# Supplementary material for: A scale-invariant log-normal droplet size distribution below the critical concentration for protein phase separation
Source: eLife. 2024 Nov 18;13:RP94214. doi: 10.7554/eLife.94214 (PMC11573347; doi:10.7554/eLife.94214)
Supplement: Supplementary file 1. — Size distributions of FUS and SNAP-FUS condensates below their critical concentrations. [file elife-94214-supp1.xlsx]

## Sheet: FUS
Size (nm)	0.125 μM			0.25 μM			0.5 μM			1 μM			2 μM			Buffer
5	0	0	0	0	0	0	0	0	0	0	0	0	0	0	0	0	0	0
15	226059	0	0	44266	0	0	90795	0	40964	0	0	0	0	0	0	0	0	0
25	1022404	185926	176869	637429	594488	485078	953347	834614	475181	45768	36957	84194	916456	423718	233628	0	0	0
35	1443696	617540	214104	2363798	2268963	2098707	4103932	2561687	2916626	816193	997847	1494445	2726831	1618465	1588671	0	0	0
45	760381	703863	1470804	7179925	7867058	5415059	11667153	9750937	8192770	3951288	3865732	2967841	7767336	5890381	4679236	0	0	0
55	1238188	1912383	763329	8764644	15724208	11740877	24750707	18097078	15222166	10175711	8951055	9366591	13228510	10981948	8297134	320575	0	86776
65	2091048	1527250	3965586	15431085	19449666	21541441	40812336	34012591	26216863	19817463	19979110	17680756	19869057	16844544	13757355	183186	0	315549
75	1520762	3997411	4337942	19689463	20846713	15067129	50209614	40788666	43257824	44112545	37533821	27454285	31024274	23422598	21306879	38164	0	0
85	1587552	1972145	2327222	18237542	17081622	16561962	48321079	51109785	40357583	50459015	41310856	40055331	42915661	33640464	30832229	0	0	323438
95	2080773	657382	1508040	10915966	11433986	15740299	43372753	38293087	40251077	55485847	47800556	45738432	48294203	42851130	36232375	53429	30923	0
105	801483	703863	1926940	6409699	9660430	9602572	31669283	29062751	28986019	49886917	39403860	36694585	61935869	52575815	48734813	0	319535	110442
115	529184	1746377	791255	3904250	6985234	3850928	20610456	19931577	17303129	37155837	35523345	32660285	56121635	53492714	45090216	305309	463841	607432
125	421292	1799499	921580	5311905	4121784	5137871	15099202	14494190	12903612	25301973	26513158	27833158	57563926	54576322	50830791	0	0	126220
135	673040	584339	381664	4550532	1951902	2464990	10051002	8073445	6062650	22525392	14701609	22409656	62288930	62557509	43107715	0	0	0
145	231197	1248361	837800	1956552	2041076	1554231	6010626	6040623	4293011	12776848	17288619	14488397	56790197	48533124	46598785	0	0	0
155	606250	996033	0	2381504	2031167	1197847	5238869	3792949	3219758	10724924	11663720	10510227	49420993	40468582	39369666	0	0	528545
165	0	604260	586460	1628984	1496128	910759	1271129	3098815	1491084	8406022	7849728	5858504	40564426	38322205	30972406	0	0	0
175	77066	0	325811	929583	1070078	197991	708201	1495695	1187952	5331950	6053604	3550184	30490927	36384214	29296959	0	0	0
185	179820	0	0	247889	544947	534576	708201	157007	90120	3112211	2047434	3206391	28981029	21824972	23689885	99225	0	0
195	0	790186	93089	0	416142	692969	1752343	958567	213012	1517966	1722210	1276943	17622990	22200067	22114565	0	0	0
205	313400	0	93089	0	0	356384	90795	0	499759	755169	1833081	2890663	13401285	11905793	16100311	0	0	0
215	154131	86323	0	115091	267520	920659	208828	446229	426024	1098428	975672	982264	10396512	10975002	10646764	0	0	0
225	0	0	0	301008	237795	108895	345021	570182	114699	1334895	561751	1227830	6956048	8939764	6808589	0	0	0
235	0	112884	0	106238	0	0	290544	123953	0	389026	229135	266615	3650798	5529178	3791450	0	0	0
245	87341	0	0	0	0	0	226987	0	0	0	88697	1627752	3876156	5133244	3884901	0	0	0
255	0	0	0	0	0	0	0	173534	0	404282	0	435003	2140900	4230238	3491071	0	0	0
265	0	0	0	0	0	0	0	0	172048	762797	251310	91210	1945590	1576788	2089302	0	0	0
275	0	0	0	0	0	0	0	247905	0	343259	0	0	1262004	1285048	1762223	0	0	0
285	0	0	0	0	0	0	0	0	0	183071	0	0	1224445	1153070	881112	0	0	0
295	0	0	0	0	0	0	0	0	0	183071	0	0	961527	472342	1688797	0	0	0
305	0	0	0	0	0	0	0	0	0	0	0	0	736169	291741	1214866	0	0	0
315	0	0	0	0	0	0	0	0	0	0	0	0	631002	222279	667509	0	0	0
325	0	0	0	0	0	0	0	0	0	0	0	0	150239	0	0	0	0	0
335	0	0	0	0	0	0	0	0	0	0	0	0	247894	0	233628	0	0	0
345	0	0	0	0	0	0	0	0	0	0	0	0	585931	1201693	120152	0	0	0
355	0	0	0	0	0	0	0	0	0	0	0	0	0	138924	0	0	0	0
365	0	0	0	0	0	0	0	0	0	0	0	0	465740	0	0	0	0	0
375	0	0	0	0	0	0	0	0	0	0	0	0	0	0	0	0	0	0
385	0	0	0	0	0	0	0	0	0	0	0	0	0	0	0	0	0	0
395	0	0	0	0	0	0	0	0	0	0	0	0	0	0	220278	0	0	0
405	0	0	0	0	0	0	0	0	0	0	0	0	0	0	0	0	0	0
415	0	0	0	0	0	0	0	0	0	0	0	0	157751	0	0	0	0	0
425	0	0	0	0	0	0	0	0	0	0	0	0	0	0	0	0	0	0
435	0	0	0	0	0	0	0	0	0	0	0	0	0	0	0	0	0	0
445	0	0	0	757981	0	0	0	0	0	0	0	0	0	0	0	0	0	0
455	0	0	0	0	0	0	0	0	0	0	0	0	0	0	0	0	0	0
465	0	0	0	0	0	0	0	0	0	0	0	0	0	0	0	0	0	0
475	0	0	0	0	0	0	0	0	0	0	0	0	0	0	0	0	0	0
485	0	0	0	0	0	0	0	0	0	0	0	0	0	0	0	0	0	0
495	0	0	0	0	0	0	0	0	0	0	0	0	0	0	0	0	0	0
505	0	0	0	0	0	0	0	0	0	0	0	0	0	0	0	0	0	0

## Sheet: SnapFUS
Size (nm)	0.125 μM			0.25 μM			0.5 μM			1 μM			1.5 μM			2 μM			2.5 μM			3 μM			Buffer
5	0	0	0	0	0	0	0	0	0	0	0	0	0	0	0	0	0	0	0	0	0	0	0	0	0	0	0
15	0	0	0	46480	147128	71560	0	0	0	0	0	0	0	80487	115580	35871	80611	179597	0	0	0	0	0	0	0	0	0
25	76320	71334	287313	399727	760163	259407	569843	200414	293331	113446	32517	168476	848831	1134137	1220809	1750484	1993285	2356317	70356	34247	0	50844	0	0	0	0	0
35	305279	332893	194962	1691866	948161	375692	2455942	1996434	1888763	1087749	780406	978458	3050038	4068260	3525177	3414879	4690082	3965508	337707	253430	352017	1177897	112946	72765	0	0	0
45	444042	535007	964549	1403691	1185201	2012637	6332479	5981593	4271181	4010659	3446793	2812256	7675450	8882856	8003886	5954516	6075121	6688203	1287507	1417836	1049150	3643854	1438174	502079	0	0	0
55	367722	618231	1087683	2872454	1978059	3229165	17207649	12895884	8807074	9682972	6906592	8462686	14336619	12219414	12872676	9218739	7049779	7981304	2779046	2383609	3223375	5550521	3305542	2161121	0	0	0
65	1068475	1640689	369402	2779494	4062378	4427802	30891904	31056495	22564997	16062656	15295955	13776165	19854023	17751077	17098554	12274912	12824442	9073256	5290740	5938474	4175893	10321427	5459038	4649684	0	0	0
75	1096228	677676	3180960	7102119	7119379	4857165	39134561	35558106	34219525	31217743	25850944	23379305	32514559	27168075	26417158	14319535	14575894	13570372	9723142	8068653	8013572	11456954	9863918	8782737	0	0	0
85	1672094	1343462	2165105	7641285	9792211	15841691	50154198	45671316	37288765	46459582	37316407	33760028	49685412	37002142	35410694	21113423	18987502	16041631	16188820	11575572	11499235	18193846	15066946	11656955	642394	774774	111752
95	3441323	3364601	2698686	10634586	5599052	9624878	47971138	43428218	32788644	55428510	43280008	37641459	57533506	48599610	43898569	29363656	23816821	18785877	20776004	15918124	16144484	25710354	20059143	18176700	0	0	686477
105	1658218	974902	1457085	4192481	6539039	6878747	34487532	32282105	29147051	55722136	46609740	45760713	68956762	52982502	48456739	33180285	30148431	21386446	31406733	22767575	24689533	31108342	30947101	25693326	0	0	122395
115	1318249	1414797	851676	3095557	3204129	6825076	24302594	23317423	24024496	51638070	42753234	41918161	71100421	55704432	55470974	37750197	40107526	30826080	39898652	29863607	28216610	36853767	39335196	31194361	0	0	0
125	513423	2389699	328357	4685167	3138739	4866110	13210723	15963763	18007640	47814264	36633552	34401533	68949569	68575060	58353240	46674797	46094708	32701076	37970909	35836328	32834249	46344734	39440612	36346123	0	0	47894
135	242835	1771468	1149250	1933561	743816	2245209	8499487	13173380	8578133	36155992	34728061	20793844	68525153	53802008	54394639	44142334	37557294	35689575	50416812	46946138	39909109	50022484	52881141	41432398	0	0	500224
145	1061537	368560	2442157	892413	1013551	2352549	6998633	4239531	6460429	24257481	23165047	23871774	59892969	58653188	52819868	45247148	39499281	39884968	52133489	42877564	38066194	52895197	53860003	46096635	0	0	0
155	1415383	0	1446824	957485	1005377	831890	3025785	4023701	1595433	19586164	20661245	14365831	50879531	49250825	44382558	50685128	41836994	34597624	54982890	45425560	38287068	52717241	51789333	57608060	0	0	0
165	1568022	404228	389924	204511	147128	1538549	2142930	1611022	2225020	15208473	13091308	8929236	42211379	43616724	33633658	46997632	44607073	37686697	49825825	48898231	40875431	51090218	55283118	56400161	0	0	0
175	152639	796566	441230	195215	956334	626154	1629269	1102278	1631205	11791738	8421880	5306999	32169272	28829037	28815434	35110122	38004317	30675219	45168286	45048840	40730483	53039256	57105307	53111182	0	0	0
185	0	380450	123134	0	1038072	322022	449454	793949	822757	4971616	6386321	3615757	21896973	21790069	22277964	32513093	33702633	30653667	40686635	38754194	30963726	48039550	54635563	49080001	0	0	0
195	430165	0	205223	353247	850075	0	1163764	362287	414956	4244225	4662925	2993692	16178151	17260837	20840443	28839945	27466290	22578972	45083859	35987016	31971462	44556704	51149308	50688107	0	0	0
205	277526	0	0	929597	0	223626	971141	346871	236095	2102093	2731420	1457967	11020421	12212097	16578446	25066360	24872089	21077539	30013693	30671842	28672161	42463607	42633208	46285824	0	0	0
215	561990	463673	143656	0	106259	107341	385246	1071445	100162	2355678	955997	1211732	10610393	11114545	10553860	22153669	25201860	20675241	25131015	30589649	28803305	39828168	42226604	37917848	0	0	0
225	180392	142669	0	0	0	161011	192623	92499	178860	1321315	890963	524868	6006561	9336511	6891432	23014563	19383228	19367773	25440580	26178602	22432481	32870950	38642463	34177726	0	0	0
235	0	0	995333	0	0	0	0	92499	0	240239	969004	615586	4042739	3885335	4912132	15567831	15066887	15689620	17054194	17192122	17193634	31769320	31105225	24063389	0	0	0
245	0	0	687498	0	0	0	361168	0	85853	607271	0	110157	2524914	4324356	4196983	9979195	12707190	9561760	18806048	12952312	19002037	21947863	26865999	20679816	0	0	0
255	0	202114	533580	0	0	0	0	0	93007	100100	299156	797022	2517720	2429249	3850245	8135447	9797874	14073244	11221716	8102901	16434380	19295476	16715952	18555078	0	0	0
265	0	0	0	0	0	0	240779	0	0	106773	318666	239755	776897	2048764	3084530	9469833	7929169	5862056	10173418	9842661	11837448	16710883	14005257	13912670	0	0	0
275	0	0	543842	0	0	0	0	0	0	0	0	0	1294828	702433	2997845	5509721	8537414	4303151	8681879	8698803	8938481	12482317	15074476	12864854	0	0	0
285	464856	0	307835	0	0	0	0	0	436419	200199	234122	0	539511	182925	1126901	3127914	3524889	5287344	4650504	7712482	5735813	7830048	11806582	9626811	0	0	0
295	0	0	143656	0	0	0	0	0	0	0	0	0	143870	270730	231159	2869646	3136492	1257181	6353109	4856261	4396766	8058849	7537238	6672552	0	0	0
305	0	0	0	0	0	178901	0	0	0	0	0	0	381255	680482	866847	1836574	1025955	2126432	5902834	3226091	3030110	6067440	4615711	8819119	0	0	0
315	0	0	0	0	0	0	0	0	0	0	0	0	230192	270730	267278	2467896	2923973	1221262	2575014	863031	2098300	4152298	4171458	6061325	0	0	0
325	0	0	0	0	0	0	0	0	0	146813	117061	0	230192	299998	317844	1190903	388397	2076145	2012170	2294566	3092231	4177721	2567631	2619540	0	0	0
335	0	0	0	0	343300	0	0	0	0	0	0	0	0	0	0	2001578	534962	2054593	1526716	1404137	704035	2957453	1633947	1695425	0	0	0
345	0	0	0	0	0	0	0	0	0	0	0	0	0	343900	166146	767630	432367	1530169	633200	1356191	876592	3143883	2462215	2313927	0	0	0
355	0	0	0	0	0	0	0	0	0	0	0	0	0	168291	0	143482	813436	912354	281422	226032	683328	2067675	1084278	1156964	0	0	0
365	0	0	0	0	0	0	0	0	0	0	0	0	0	585361	0	660019	490993	1142239	795018	1047966	469357	1669393	1008981	603950	0	0	0
375	353846	0	0	0	0	0	0	0	0	0	0	0	0	0	0	322835	131909	560344	598022	664397	683328	872830	436723	807692	0	0	0
385	0	0	0	0	0	0	0	0	0	0	0	0	0	0	0	337183	0	653734	379920	157537	179460	296593	624966	516632	0	0	0
395	0	0	0	0	0	0	0	0	0	0	0	0	0	0	0	229572	0	510056	0	1219202	655719	262696	888506	611226	0	0	0
405	0	0	0	0	0	0	0	0	0	0	0	0	0	0	0	0	0	373562	0	0	386529	254222	353896	1586277	0	0	0
415	0	0	0	0	0	0	0	0	0	0	0	0	0	0	404529	0	0	193965	0	232881	0	610134	0	785862	0	0	0
425	0	0	0	0	0	0	0	0	0	0	0	0	0	0	0	0	0	0	0	0	0	457600	225891	0	0	0	0
435	0	0	0	0	0	0	0	0	0	0	0	0	0	0	0	0	498321	545976	0	232881	987029	177956	534609	0	0	0	0
445	0	0	0	0	0	0	0	0	0	0	0	0	0	0	0	0	0	0	0	184935	0	0	527080	0	0	0	0
455	0	0	0	0	0	0	0	0	0	0	0	0	0	0	0	0	0	0	189960	0	0	0	0	0	0	0	0
465	0	0	0	0	0	0	0	0	0	0	0	0	0	0	0	0	0	0	0	952074	372724	220326	0	0	0	0	0
475	0	0	0	0	0	0	0	0	0	0	0	233275	0	0	0	0	0	0	189960	226032	241581	0	0	0	0	0	0
485	0	0	0	0	0	0	0	0	0	0	0	0	0	0	0	0	0	172413	0	0	0	0	0	269231	0	0	0
495	0	0	0	0	0	0	0	0	0	0	0	0	0	0	0	0	0	0	182925	0	0	0	0	0	0	0	0
505	0	0	0	0	0	0	0	0	0	0	0	0	0	0	0	0	0	0	0	0	0	0	0	0	0	0	0
515	0	0	0	0	0	0	0	0	0	0	0	0	0	0	0	0	0	0	527667	0	0	0	203302	0	0	0	0
525	0	0	0	0	0	0	0	0	0	0	0	0	0	0	0	0	0	0	0	0	0	0	0	0	0	0	0
535	0	0	0	0	0	0	0	0	0	0	0	0	0	0	195041	0	0	0	0	0	0	0	0	0	0	0	0
545	0	0	0	0	0	0	0	0	0	0	0	0	0	0	0	0	0	0	0	0	0	0	0	436590	0	0	0
555	0	0	0	0	0	0	0	0	0	0	0	0	0	0	0	0	0	0	0	0	0	0	0	0	0	0	0
565	0	0	0	0	0	0	0	0	0	0	0	0	0	0	0	0	0	0	0	0	0	0	0	0	0	0	0
575	0	0	0	0	0	0	0	0	0	0	0	0	0	0	0	0	0	0	0	0	0	0	0	0	0	0	0
585	0	0	0	0	0	0	0	0	0	0	0	0	0	0	0	0	0	0	0	0	0	0	0	0	0	0	0
595	0	0	0	0	0	0	0	0	0	0	0	0	0	0	0	0	0	0	0	0	0	0	0	0	0	0	0
605	0	0	0	0	0	0	0	0	0	0	0	0	0	0	0	0	0	0	0	0	0	338963	0	0	0	0	0
615	0	0	0	0	0	0	0	0	0	0	0	0	0	0	0	0	0	0	0	0	0	0	0	0	0	0	0
625	0	0	0	0	0	0	0	0	0	0	0	0	0	0	0	0	0	0	0	0	0	0	0	0	0	0	0
635	0	0	0	0	0	0	0	0	0	0	0	0	0	0	0	0	0	0	0	0	0	0	0	0	0	0	0
