# Supplementary material for: A scale-invariant log-normal droplet size distribution below the critical concentration for protein phase separation
Source: eLife. 2024 Nov 18;13:RP94214. doi: 10.7554/eLife.94214 (PMC11573347; doi:10.7554/eLife.94214)
Supplement: Supplementary file 2. — Size distributions of α-synuclein condensates below their critical concentration. [file elife-94214-supp2.xlsx]

## Sheet: Sheet1
20 µM alpha-synuclein droplet size (µm^2)						40 µM alpha-synuclein droplet size (µm^2)						60 µM alpha-synuclein droplet size (µm^2)						80 µM alpha-synuclein droplet size (µm^2)						100 µM alpha-synuclein droplet size (µm^2)							50 µM alpha-synuclein droplet size (µm^2)						75 µM alpha-synuclein droplet size (µm^2)
Replicate 1	Replicate 2	Replicate 3	Replicate 4	Replicate 5		Replicate 1	Replicate 2	Replicate 3	Replicate 4	Replicate 5		Replicate 1	Replicate 2	Replicate 3	Replicate 4	Replicate 5		Replicate 1	Replicate 2	Replicate 3	Replicate 4	Replicate 5		Replicate 1	Replicate 2	Replicate 3	Replicate 4	Replicate 5			Replicate 1	Replicate 2	Replicate 3	Replicate 4	Replicate 5		Replicate 1	Replicate 2	Replicate 3	Replicate 4	Replicate 5
7.829	6.457	0.081	0.081	0.081		0.242	2.421	2.825	1.695	1.856		1.695	2.341	0.161	4.6	4.923		2.986	6.134	0.484	1.13	0.404		0.807	0.161	0.404	0.807	0.242			565	1.049	242	1.291	404		323	161	1.291	323	968
4.116	4.762	0.081	0.161	0.646		0.726	0.161	2.905	1.291	0.565		1.291	1.211	0.323	2.421	9.281		0.565	4.035	0.242	0.888	0.081		1.13	44.954	1.049	0.242	3.067			2.341	242	1.937	2.179	242		323	81	2.663	565	4.358
5.004	5.085	0.323	0.323	0.888		0.161	2.26	2.341	0.807	0.484		0.807	0.081	0.081	9.12	0.565		0.968	11.46	0.484	0.161	0.242		0.081	0.726	0.404	0.565	1.049			1.453	81	1.291	2.421	404		646	646	161	646	5.972
0.081	2.663	0.081	0.081	0.081		0.161	1.856	2.583	1.049	0.081		1.049	1.211	0.161	0.565	3.067		0.081	2.986	1.049	0.484	1.291		0.161	0.807	0.323	0.161	0.323			484	323	1.211	2.018	2.26		161	161	1.291	2.663	1.13
5.327	1.453	0.484	0.081	0.484		0.161	0.646	2.502	0.807	1.453		0.807	1.291	0.726	5.407	0.646		1.13	3.47	0.404	1.211	3.551		0.404	0.161	3.148	0.484	0.565			1.211	242	2.179	81	2.421		323	161	81	1.211	5.972
3.067	2.341	0.404	0.404	0.081		0.242	1.695	3.713	0.323	5.972		0.323	0.323	0.968	11.138	1.856		0.081	1.049	0.323	0.968	0.726		1.049	0.726	0.242	22.275	0.161			242	81	1.13	968	1.614		81	1.049	81	1.695	5.004
0.081	2.421	0.081	0.242	1.049		1.291	1.049	2.179	2.905	0.565		2.905	4.439	0.081	2.825	21.226		12.429	9.766	0.323	0.323	0.081		0.968	0.726	0.565	1.856	1.614			646	81	726	565	161		242	565	1.211	4.278	2.825
0.081	3.874	0.484	0.565	0.888		1.049	1.856	2.744	0.323	2.502		0.323	3.067	1.13	0.565	5.73		3.713	16.142	0.081	0.081	2.341		0.404	0.565	4.52	0.807	0.161			484	81	323	2.341	81		242	242	1.453	888	161
5.327	2.098	0.404	0.404	0.968		0.404	2.421	3.47	2.26	1.291		2.26	5.488	1.211	1.695	10.008		7.022	2.341	0.807	0.323	0.484		1.211	0.081	0.081	0.161	1.049			242	726	242	726	1.049		565	242	565	161	3.793
4.197	1.614	0.161	0.404	0.242		0.888	1.533	1.776	2.098	9.443		2.098	2.421	0.888	20.177	0.081		15.415	6.376	0.968	1.776	0.888		0.323	0.968	1.372	0.646	1.211			484	565	242	404	1.13		484	323	161	242	1.211
0.726	5.246	0.242	0.323	0.323		1.211	2.179	4.681	1.614	1.372		1.614	0.484	0.646	5.165	9.846		1.372	19.047	0.888	0.404	1.937		0.081	0.242	0.807	0.807	0.161			242	888	1.937	726	2.986		81	161	646	484	726
2.26	4.278	0.323	0.484	1.049		0.807	1.776	2.825	1.13	0.646		1.13	8.313	1.049	0.081	3.067		2.663	3.309	1.049	0.323	0.081		1.211	0.081	0.323	0.081	5.892			1.291	807	161	1.372	1.372		323	242	161	81	1.291
4.197	5.811	0.242	0.323	0.484		1.695	1.856	3.228	1.937	1.049		1.937	10.492	1.372	9.524	1.13		1.211	17.433	0.726	0.242	1.695		1.856	0.646	2.663	1.856	0.081			484	323	1.453	1.453	726		161	807	1.776	1.937	646
3.39	2.502	0.323	0.323	0.484		0.161	2.341	3.309	0.081	0.404		0.081	0.404	1.533	0.726	3.551		13.801	12.913	2.502	2.583	2.986		1.13	0.081	2.986	0.323	0.646			404	81	1.856	565	323		1.13	484	2.018	242	4.923
1.211	2.341	0.242	0.404	0.565		0.081	1.614	3.228	3.228	1.13		3.228	0.404	1.937	9.685	2.098		2.825	8.555	1.695	0.646	5.327		0.968	0.161	0.161	0.646	0.081			968	323	4.278	807	646		323	161	1.049	2.905	1.695
5.246	3.874	0.161	0.484	0.242		0.888	2.26	2.018	2.825	0.565		2.825	2.502	0.565	2.744	1.049		10.573	5.65	1.049	1.13	0.323		0.323	0.081	1.533	0.807	0.081			565	81	161	323	81		404	1.049	726	4.439	646
4.116	5.811	0.081	0.807	0.484		0.242	3.713	2.098	3.874	0.081		3.874	9.12	1.13	1.049	0.323		1.291	12.671	0.565	0.081	1.291		0.404	0.081	3.39	1.614	0.968			81	888	161	323	323		404	81	1.13	323	5.327
4.439	2.583	0.726	0.565	0.726		0.242	1.533	1.211	3.713	1.856		3.713	0.161	0.081	3.309	1.372		10.169	0.888	1.13	0.323	0.242		0.323	0.323	3.148	3.793	0.323			1.049	484	1.614	242	4.116		726	81	484	161	484
2.663	3.793	0.404	0.161	0.323		2.179	1.453	3.955	2.341	1.453		2.341	0.242	0.646	1.776	1.453		1.211	1.453	0.646	0.081	1.533		0.161	0.968	1.211	0.161	0.565			888	81	81	1.211	161		81	242	484	323	807
2.341	1.049	0.404	0.323	1.695		1.13	1.776	6.376	1.049	3.47		1.049	0.484	0.646	0.242	0.565		12.51	8.474	0.081	1.937	0.484		0.726	0.081	3.874	0.161	0.807			646	1.695	726	4.681	404		323	807	1.291	3.067	4.681
4.278	2.26	0.081	0.323	0.646		1.372	1.776	3.148	2.26	1.776		2.26	1.614	1.453	0.968	0.242		9.766	7.344	0.726	0.081	2.098		0.807	0.646	1.049	0.565	0.323			161	81	404	81	161		484	1.049	1.049	484	1.614
3.39	1.453	0.081	0.726	1.049		0.242	2.663	5.327	1.372	0.081		1.372	10.896	1.856	1.13	2.098		5.73	7.102	1.291	0.081	0.081		1.372	0.807	1.211	0.323	0.323			1.937	242	81	484	726		1.13	161	646	3.309	565
2.179	2.421	0.484	0.646	0.726		0.323	1.856	4.116	2.018	1.211		2.018	0.646	0.565	0.565	1.856		6.295	19.047	0.565	0.888	2.663		0.726	0.484	0.323	0.081	0.081			2.905	323	1.211	81	1.453		646	1.372	1.211	1.776	4.197
3.955	0.081	0.484	0.404	0.484		0.484	1.13	3.632	1.937	0.807		1.937	0.323	2.26	0.323	2.583		5.085	11.218	1.049	1.453	0.242		0.081	0.484	0.242	0.081	0.081			242	807	726	565	807		646	1.13	81	1.13	1.856
2.583	2.663	0.161	0.323	1.453		0.242	2.744	2.341	3.551	0.404		3.551	0.726	2.502	1.372	0.968		4.762	5.085	0.242	0.726	0.888		2.098	0.081	0.323	0.646	0.161			161	807	646	81	404		81	726	2.341	323	484
3.148	1.856	0.646	0.081	0.161		1.776	1.937	1.533	3.955	2.421		3.955	4.52	1.695	1.614	0.323		25.342	1.937	0.726	0.161	3.632		0.404	0.323	0.726	57.625	10.331			81	323	565	242	404		81	81	161	13.559	2.744
2.905	3.47	0.323	0.726	1.13		1.856	1.614	0.565	3.148	0.565		3.148	0.968	0.484	2.341	3.148		11.299	7.829	2.502	0.565	0.807		1.372	0.242	3.955	0.726	0.081			1.856	242	323	3.309	81		81	81	968	6.053	3.228
4.197	2.986	0.565	0.565	0.807		1.614	0.807	1.695	2.26	1.695		2.26	0.726	0.726	0.888	1.453		1.695	12.187	0.242	0.968	5.327		0.242	0.323	0.484	0.081	0.161			646	81	968	161	161		565	242	1.049	4.197	161
4.439	1.372	0.323	0.565	0.807		1.211	2.098	1.049	1.291	3.309		1.291	8.797	0.161	0.404	0.968		6.86	10.492	0.646	1.453	0.484		1.937	0.323	0.081	1.372	0.242			242	81	2.018	404	3.228		161	242	404	3.228	8.151
2.179	3.793	0.404	0.646	0.161		1.049	1.614	2.502	2.26	0.565		2.26	2.986	0.484	1.533	2.26		9.039	4.035	1.453	1.291	0.323		0.323	0.807	5.407	0.646	0.323			242	404	323	242	404		1.211	242	5.972	1.776	1.049
4.681	4.278	0.323	0.161	0.888		0.323	2.26	3.39	1.856	0.081		1.856	8.394	1.776	3.228	1.049		8.474	9.604	0.646	0.726	1.211		6.134	1.372	3.793	1.937	0.161			646	242	888	807	2.179		242	161	3.47	242	2.825
3.713	4.923	0.323	0.807	0.888		0.404	0.323	1.695	2.663	1.695		2.663	2.26	1.13	1.372	1.937		5.73	3.551	1.695	0.726	3.632		0.323	0.242	0.807	7.587	3.228			81	404	161	242	1.695		726	565	323	1.937	2.26
2.341	4.197	0.565	0.807	0.726		1.211	2.905	0.646	2.421	1.372		2.421	0.807	1.13	0.968	8.071		1.695	1.856	1.856	2.26	1.372		0.242	0.323	0.161	0.888	0.484			1.13	81	81	161	242		646	161	2.098	1.453	6.457
3.874	1.13	0.404	0.323	1.211		0.323	2.341	3.47	3.228	0.968		3.228	1.049	0.323	2.26	1.372		15.819	3.309	2.098	0.565	2.098		0.484	0.323	3.39	0.484	0.646			565	404	1.695	726	404		807	1.049	565	646	323
0.565	1.856	0.404	0.565	0.161		1.937	1.614	4.116	3.713	0.726		3.713	1.291	1.13	1.856	2.744		15.577	21.388	0.888	0.081	1.211		1.049	0.484	2.179	1.776	1.13			161	484	1.453	81	323		161	323	161	807	81
4.439	3.228	0.646	0.807	1.372		1.533	2.341	3.713	2.018	1.453		2.018	0.081	1.776	7.99	0.565		8.959	8.071	0.242	0.081	0.726		2.421	0.323	0.484	7.99	1.211			888	1.533	807	888	323		1.533	1.211	3.874	2.744	81
3.713	2.663	0.242	0.726	1.049		1.533	1.614	1.856	2.018	12.429		2.018	6.214	0.646	0.888	1.937		8.797	0.968	0.807	0.484	0.081		23.486	0.161	0.161	3.309	0.081			323	161	1.291	968	3.148		726	323	323	1.13	81
2.825	0.081	0.081	0.323	1.211		0.646	4.762	2.26	2.905	0.242		2.905	0.242	0.968	1.13	2.502		12.429	0.081	1.614	0.081	0.081		0.565	1.13	0.323	0.646	0.484			161	565	2.986	323	81		1.211	323	1.372	2.502	323
3.067	1.372	0.646	0.726	0.565		0.161	0.323	4.842	3.713	2.502		3.713	0.888	0.968	0.484	1.291		19.047	8.797	1.049	1.695	0.968		0.807	0.646	1.695	0.081	2.018			323	242	1.533	565	1.533		81	404	323	1.695	1.614
3.793	1.291	0.565	0.484	0.484		0.323	1.776	4.116	0.807	0.404		0.807	0.888	1.291	1.695	3.228		0.242	6.214	0.404	0.323	0.161		1.049	0.484	0.726	0.726	0.323			888	484	323	1.856	404		323	2.098	565	484	3.793
2.663	3.551	0.484	0.484	0.323		2.421	2.905	2.341	3.955	4.52		3.955	0.484	1.372	10.815	11.218		0.242	4.923	0.081	0.161	0.646		0.081	0.565	2.421	0.081	0.484			646	161	161	161	2.098		1.695	81	968	2.905	1.695
4.116	1.291	0.323	0.161	1.453		0.323	0.726	3.39	1.372	0.726		1.372	0.242	2.341	10.25	11.38		2.502	16.545	1.614	0.646	0.888		1.533	0.242	0.484	92.814	0.161			3.632	484	323	2.018	807		807	646	807	1.372	2.986
0.565	3.47	0.161	0.323	2.502		3.067	1.856	3.713	2.26	0.242		2.26	1.291	0.726	2.018	2.421		1.533	13.962	0.484	0.404	4.035		0.484	0.081	0.646	2.018	0.161			1.614	1.049	888	3.551	81		242	1.049	81	4.278	8
4.842	0.081	0.726	0.565	0.726		2.502	3.551	2.744	3.067	2.825		3.067	1.372	0.807	1.049	2.825		2.421	20.258	0.807	1.937	5.004		1.049	0.323	0.646	1.291	0.565			1.049	888	968	4.762	565		404	1.372	404	1.049	1.372
5.407	1.049	0.565	0.161	0.565		1.211	2.421	2.098	3.148	2.744		3.148	0.242	2.26	2.825	0.646		10.573	18.724	0.081	1.13	0.161		3.551	0.081	1.453	2.26	0.323			323	323	2.744	1.533	1.776		888	81	2.341	484	1.291
0.242	2.986	0.565	0.807	0.565		1.937	2.098	0.484	7.183	3.309		7.183	1.291	2.098	0.081	1.372		11.138	15.012	0.968	0.968	0.242		0.161	0.484	2.744	2.018	0.161			726	81	968	484	888		807	323	1.856	323	5.811
3.47	6.053	0.484	0.888	1.937		0.081	0.888	4.923	1.291	11.945		1.291	1.695	1.211	0.646	8.878		2.179	2.26	1.372	0.404	1.695		1.614	0.242	1.614	0.242	0.161			242	1.211	1.211	1.614	81		404	1.453	3.309	81	968
3.955	0.081	0.323	1.049	1.453		1.533	1.13	6.214	1.533	0.404		1.533	0.323	1.695	2.583	0.323		3.551	3.39	0.081	0.404	1.533		1.614	0.484	0.726	0.161	0.646			807	242	161	242	4.842		1.049	888	404	888	1.776
5.246	6.86	0.323	0.323	1.049		0.807	0.968	2.905	2.583	1.049		2.583	0.242	1.695	1.211	1.856		1.453	5.004	1.856	1.695	3.632		0.888	0.242	1.211	49.958	1.049			1.937	81	323	807	1.13		1.372	323	81	242	161
6.214	2.018	0.323	0.323	0.968		1.776	0.807	1.291	1.291	1.291		1.291	2.905	1.453	8.474	4.923		4.358	8.394	1.049	2.905	0.081		0.081	0.081	0.161	0.807	0.888			565	161	81	565	646		807	323	565	1.614	1.533
2.583	3.713	0.484	0.968	0.968		0.968	2.744	3.148	0.404	0.323		0.404	13.397	5.811	1.776	0.807		0.081	9.846	2.421	1.291	3.148		0.565	0.968	0.646	15.334	0.323			565	726	323	1.049	161		2.502	968	484	81	3.713
2.905	0.081	0.565	0.888	0.807		3.551	2.744	3.47	1.776	4.52		1.776	1.049	1.13	0.242	6.779		9.524	2.179	1.453	0.161	0.646		0.323	0.484	0.161	0.161	0.565			888	565	323	81	81		323	968	81	1.372	3.632
1.372	2.179	0.242	1.049	0.484		1.291	0.565	4.278	3.067	0.242		3.067	1.453	2.663	4.6	10.411		0.484	9.846	1.13	1.049	4.197		0.323	0.404	0.968	1.695	0.484			161	81	404	81	242		161	726	2.341	968	323
3.148	3.39	0.242	0.565	1.614		0.323	1.695	4.923	0.726	4.358		0.726	0.646	1.695	0.726	2.663		1.372	2.744	0.242	0.807	0.888		2.179	0.242	3.874	0.081	0.888			1.372	726	1.291	81	807		81	2.663	323	404	25
1.695	4.278	0.161	0.081	1.291		0.323	2.825	4.197	5.811	0.404		5.811	5.004	1.776	4.278	12.268		17.11	13.478	0.565	1.856	5.004		0.646	0.242	0.565	1.13	0.726			484	404	1.211	1.453	888		1.291	161	484	1.291	81
0.081	3.067	0.161	0.242	0.968		0.726	1.937	2.905	2.663	1.614		2.663	1.937	1.614	6.537	0.565		2.502	1.13	2.744	0.807	0.081		0.646	0.646	0.081	3.309	0.323			646	565	807	484	242		242	81	1.13	1.614	2.905
3.067	3.551	0.646	0.807	0.565		1.453	5.165	4.681	3.067	2.26		3.067	0.807	1.13	10.088	1.453		6.053	8.716	0.404	0.807	0.323		4.358	0.888	5.972	0.404	0.726			1.614	968	81	888	161		404	242	565	3.955	2.018
4.278	0.081	0.565	0.888	1.13		0.323	1.533	5.488	2.583	2.986		2.583	8.151	1.533	2.583	12.994		4.6	9.443	0.888	5.65	0.081		0.888	0.323	0.565	0.161	0.242			404	1.614	81	242	323		1.049	323	2.583	6.537	81
2.583	1.937	0.565	0.565	0.404		2.098	2.018	1.372	2.502	0.323		2.502	0.242	0.968	0.484	2.421		15.899	5.085	1.776	2.018	2.098		0.646	0.807	0.161	3.309	1.695			404	484	1.533	323	404		81	1.614	2.986	484	4.358
1.291	4.116	0.484	0.807	0.726		0.323	1.695	2.098	4.842	1.453		4.842	0.646	2.341	1.372	1.13		0.081	18.24	1.695	1.049	0.081		0.968	0.646	0.565	1.533	1.695			1.614	1.695	565	161	1.049		242	1.776	1.13	1.614	1.937
3.148	4.035	0.484	0.404	0.726		2.421	2.663	5.085	3.39	0.242		3.39	5.085	1.372	11.218	1.533		14.527	4.681	2.26	0.807	1.533		2.421	0.404	0.888	1.453	0.323			1.533	242	484	1.211	323		81	1.291	242	2.502	6.537
1.856	5.569	0.484	0.565	1.937		0.242	4.762	1.372	0.081	0.323		0.081	1.291	1.211	2.26	0.565		1.856	3.148	1.695	3.874	0.081		3.632	0.323	0.242	0.161	0.807			1.453	242	161	161	81		726	404	807	2.663	2.421
3.148	2.502	0.081	1.049	1.856		2.905	3.713	2.905	2.825	0.242		2.825	1.049	1.211	0.807	4.842		4.116	1.937	6.457	0.646	0.161		2.583	1.453	0.242	4.116	3.067			404	646	323	161	2.421		2.018	1.049	646	2.583	1.291
4.035	2.502	0.242	0.807	1.291		0.807	3.793	3.47	0.161	0.081		0.161	2.502	0.646	12.106	2.018		5.246	9.604	1.695	2.341	0.646		2.583	1.614	1.614	0.242	0.161			242	81	242	242	1.13		404	1.049	1.211	81	968
1.372	3.632	0.404	0.807	0.888		1.937	2.583	4.439	3.39	1.211		3.39	1.372	0.565	1.453	2.018		2.825	4.035	0.807	0.323	1.211		0.807	0.646	0.484	34.866	0.484			404	404	807	81	1.13		161	646	3.39	484	1.937
4.52	0.081	0.484	0.888	1.049		0.646	2.502	1.372	6.537	7.829		6.537	0.968	0.161	4.278	0.484		12.59	0.323	0.404	0.646	0.968		0.565	0.323	1.937	0.323	0.484			484	404	323	404	242		565	161	3.793	2.421	1.372
0.888	3.551	0.484	0.404	0.807		1.856	3.39	3.955	1.776	4.52		1.776	0.565	0.968	0.323	1.614		0.968	0.323	1.614	0.646	3.39		3.874	0.565	1.211	1.695	1.372			726	565	565	888	161		565	726	2.905	1.211	1.856
0.888	3.632	0.484	0.888	0.968		2.583	0.565	3.955	3.148	0.807		3.148	2.179	2.018	2.018	2.018		0.807	0.161	0.323	0.968	0.807		1.291	0.484	1.291	33.817	1.13			81	1.049	646	404	161		81	161	646	1.291	646
0.646	5.085	0.484	0.646	1.695		1.695	5.811	2.018	1.13	2.502		1.13	1.533	2.018	0.404	0.888		8.797	8.313	0.726	0.726	1.049		0.081	0.484	0.968	56.011	0.484			81	323	81	2.098	968		81	161	81	81	1.049
2.583	0.081	0.565	0.323	0.404		1.049	4.278	1.695	0.968	9.201		0.968	0.888	2.825	1.695	8.878		15.899	16.061	1.372	0.565	1.049		0.726	0.242	2.421	3.47	0.323			81	161	161	2.583	323		646	1.291	1.695	484	81
4.035	1.211	0.565	1.13	0.888		2.179	1.453	2.825	0.081	8.232		0.081	7.748	1.533	1.533	0.646		1.937	0.807	2.583	1.937	6.214		1.211	0.081	1.453	13.962	0.565			323	81	1.614	1.049	4.439		81	161	646	1.453	2.26
4.278	3.148	0.484	1.937	0.484		2.502	0.726	3.309	0.565	0.242		0.565	9.524	0.646	0.888	2.26		4.6	2.018	0.968	2.663	1.13		0.807	0.242	0.807	1.614	0.323			1.049	646	888	81	1.049		484	1.291	404	3.955	807
2.502	3.874	0.484	0.161	1.776		2.905	1.291	2.825	1.291	0.565		1.291	0.323	0.807	8.716	1.776		17.191	16.545	5.569	0.726	0.807		1.211	0.081	3.228	0.565	0.646			1.614	2.583	161	81	1.372		646	404	565	323	1.13
1.776	6.295	0.323	1.049	1.695		2.341	0.807	4.52	2.502	0.484		2.502	4.278	0.968	0.565	0.807		3.713	3.793	2.663	0.807	0.968		2.018	0.242	0.161	2.26	0.565			323	1.13	726	1.856	323		888	404	565	1.291	1.614
2.905	4.6	0.242	0.807	0.565		3.309	2.905	5.892	5.65	2.502		5.65	0.807	3.228	1.695	1.13		2.905	11.218	0.242	3.874	0.081		1.13	0.242	0.161	1.695	0.323			1.291	242	646	646	323		888	1.937	81	2.663	726
4.116	3.551	0.242	0.404	2.018		1.614	1.937	1.533	5.327	3.47		5.327	0.323	0.484	1.533	1.776		9.443	7.344	1.13	0.726	0.323		2.583	0.242	0.807	2.018	1.372			1.453	404	726	968	3.067		242	888	484	242	242
4.197	4.116	0.646	0.404	1.211		0.242	1.13	6.941	0.242	0.404		0.242	0.807	0.807	1.856	8.474		1.614	10.411	1.049	0.807	0.484		2.825	0.242	0.081	0.888	0.161			242	242	242	161	1.614		404	404	646	807	807
4.278	1.937	0.484	0.726	0.807		1.372	2.341	5.972	2.663	1.291		2.663	3.955	1.049	1.695	14.527		8.555	22.437	0.888	1.453	1.937		3.47	0.565	2.341	3.632	1.453			968	404	323	323	807		1.13	404	81	1.372	3.551
1.453	3.067	0.565	0.646	0.888		2.502	2.744	4.6	2.179	9.927		2.179	5.73	2.341	0.565	4.6		0.807	7.102	1.372	0.242	0.565		0.242	0.565	1.533	0.565	0.081			323	81	323	3.793	2.421		242	888	2.583	81	1.211
3.228	2.179	0.404	0.968	0.404		3.47	2.018	2.663	4.6	0.484		4.6	8.878	1.776	8.151	5.892		14.285	2.583	0.646	2.905	0.081		0.242	0.081	0.081	29.216	0.888			565	242	565	404	1.291		726	2.179	81	2.018	3.148
4.762	0.081	0.404	0.323	0.404		2.341	2.663	4.197	2.098	0.404		2.098	9.12	0.726	1.049	11.299		0.081	0.565	0.404	5.327	2.26		0.242	1.372	0.242	0.081	1.856			1.13	81	1.291	161	2.018		726	484	81	1.211	1.856
4.197	0.081	0.323	0.726	0.484		1.776	0.646	1.776	3.309	10.653		3.309	9.927	0.646	4.116	1.856		0.081	14.124	3.632	0.404	0.484		0.726	0.323	1.856	0.968	0.242			1.856	1.453	161	81	404		807	323	242	4.439	81
1.453	0.807	0.323	1.291	2.663		1.856	4.439	4.035	3.39	2.825		3.39	0.565	0.726	13.397	0.646		0.081	0.565	1.937	0.807	0.242		1.856	0.404	0.323	1.776	0.242			323	404	726	404	565		1.856	1.049	81	484	7.264
0.323	3.551	0.242	0.404	0.968		1.372	1.937	6.053	2.986	0.726		2.986	1.614	2.583	10.492	1.776		5.327	1.614	1.291	3.148	2.018		0.081	1.13	2.583	0.968	0.888			2.179	1.049	161	242	81		646	888	484	5.892	81
1.776	0.081	0.565	0.565	0.565		3.228	1.453	4.6	1.937	10.169		1.937	0.807	1.453	1.614	0.404		1.049	5.892	1.291	10.815	0.404		1.453	0.968	1.291	1.211	0.323			161	323	726	4.681	323		3.067	81	3.228	1.856	968
2.179	1.453	0.565	0.565	0.161		0.646	2.905	2.583	4.681	0.242		4.681	1.372	7.909	0.565	8.474		4.762	13.075	4.6	1.614	0.081		0.161	0.323	1.211	0.242	0.161			646	484	161	565	81		2.098	1.13	1.776	5.085	1.695
2.421	1.695	0.323	1.453	0.565		1.937	3.228	2.26	2.744	0.404		2.744	0.646	0.565	5.246	2.663		17.836	8.797	1.291	1.049	1.13		1.614	1.13	0.888	0.565	2.421			1.453	1.13	404	646	81		323	1.614	161	4.116	2.26
1.937	1.533	0.565	0.968	0.323		2.018	2.663	3.632	0.888	3.793		0.888	10.573	2.341	8.151	3.39		1.776	8.959	0.888	1.291	3.148		1.695	2.26	0.081	1.211	0.404			1.049	807	161	81	161		1.291	1.372	888	8.555	3.632
3.47	1.372	0.404	2.26	1.453		1.937	3.47	1.372	1.776	15.173		1.776	1.211	2.744	1.614	0.646		2.825	5.407	1.049	9.362	0.081		3.228	0.081	4.681	0.968	0.081			2.26	323	484	323	484		1.13	242	242	3.632	6.134
3.47	2.663	0.081	0.726	0.807		1.533	2.018	5.246	4.681	0.323		4.681	1.695	1.695	0.404	4.439		3.632	3.793	1.211	6.214	0.242		9.524	25.261	0.081	34.946	0.807			565	726	726	404	807		1.695	404	1.453	726	1.453
3.713	1.856	0.081	0.726	1.856		1.453	1.695	3.228	2.825	0.807		2.825	0.726	1.13	3.228	2.502		2.018	4.035	2.018	1.049	0.242		2.502	1.049	0.726	64.728	0.242			726	565	81	242	646		807	323	726	646	4.116
2.825	3.551	1.211	1.614	1.937		2.744	0.081	3.551	3.148	0.646		3.148	4.52	3.228	2.341	6.457		9.039	17.029	0.081	0.726	2.341		0.323	0.968	3.148	0.888	2.098			1.13	323	726	81	242		323	404	1.049	2.098	323
1.13	2.26	0.726	0.807	1.291		2.502	2.179	1.291	3.713	0.565		3.713	1.695	0.726	0.484	2.825		0.565	6.941	3.47	0.807	0.323		1.453	0.242	5.246	4.842	1.211			2.018	81	646	1.13	968		1.533	3.47	242	5.327	1.211
2.986	1.776	0.646	0.968	0.484		2.179	2.825	2.341	3.551	0.888		3.551	3.793	1.13	4.358	4.923		9.281	2.502	1.291	9.443	0.484		10.734	0.081	1.533	41.08	0.565			807	968	1.372	1.533	242		807	565	888	646	2.986
3.793	0.081	0.484	0.323	2.179		3.228	2.986	4.358	2.341	10.331		2.341	0.726	1.211	2.179	3.793		0.484	0.242	1.049	1.211	2.421		54.236	0.484	2.26	1.049	0.404			1.291	1.049	1.211	484	81		1.937	161	726	81	4.035
4.035	3.067	0.484	0.565	1.776		2.098	2.905	2.421	2.26	8.151		2.26	3.47	1.776	6.053	0.646		0.646	14.285	0.565	5.65	9.524		0.404	0.484	2.583	0.646	1.453			1.453	1.776	484	484	81		1.856	323	726	2.26	3.632
3.793	4.439	0.323	0.968	1.291		0.565	1.614	4.923	3.39	12.106		3.39	1.372	1.856	4.842	5.892		3.551	3.713	3.067	0.161	6.053		0.081	0.484	0.242	13.317	0.968			161	1.372	1.13	2.744	1.695		1.291	1.291	888	161	161
0.726	3.874	0.484	0.484	1.211		3.874	0.807	4.116	0.161	0.484		0.161	3.228	2.018	2.341	5.892		18.482	0.484	2.744	2.502	2.179		0.565	1.049	0.646	0.242	0.888			484	1.614	646	81	807		3.713	726	1.13	323	81
3.713	4.358	0.242	0.968	1.776		0.404	2.341	3.551	3.067	0.161		3.067	1.211	0.968	3.39	2.825		20.419	0.323	1.13	2.663	0.081		0.807	1.211	0.081	0.968	0.081			1.049	888	242	2.663	2.744		807	2.26	404	1.049	1.13
3.713	2.098	0.484	0.646	1.856		3.228	2.098	3.874	2.098	1.776		2.098	0.484	1.372	0.404	3.713		0.242	6.618	0.323	4.358	0.161		3.793	0.081	0.484	7.425	0.242			968	323	726	242	565		161	3.39	161	161	2.098
3.955	2.018	0.484	0.081	1.533		2.502	2.825	2.744	0.565	0.807		0.565	0.323	0.646	5.65	0.807		4.52	10.008	0.565	1.856	2.744		8.636	1.937	2.583	1.695	0.161			404	1.291	242	3.47	161		888	404	1.049	2.26	2.341
2.018	2.583	0.484	0.484	1.211		2.098	0.484	2.502	1.533	0.565		1.533	1.13	0.968	2.502	3.47		17.836	15.496	2.986	1.856	2.583		0.646	1.291	1.13	0.242	0.161			1.453	242	565	1.533	404		565	161	2.341	161	161
2.502	7.022	0.323	0.242	0.484		1.453	1.13	1.049	2.986	2.744		2.986	1.291	2.018	5.246	2.744		4.116	17.756	1.049	0.968	0.807		1.13	0.323	5.004	1.13	1.372			1.937	1.291	565	81	2.744		404	1.049	81	81	4.278
3.39	1.776	0.404	1.13	0.242		1.776	1.291	0.404	0.807	0.404		0.807	1.533	1.695	0.565	2.341		6.376	16.787	0.646	0.081	0.081		0.161	1.695	2.098	1.13	0.968			161	323	2.098	81	968		2.421	81	968	81	323
1.453	0.161	0.484	0.726	1.533		4.116	1.533	3.228	1.049	4.52		1.049	1.13	0.323	2.663	0.646		12.51	7.183	1.614	4.116	0.081		2.421	1.372	0.242	5.972	0.565			161	323	242	968	565		1.856	968	1.291	565	2.018
4.278	1.695	0.404	0.323	1.13		3.228	2.905	5.488	7.264	0.646		7.264	3.228	1.291	3.309	2.825		13.72	10.573	0.484	0.081	0.726		2.098	0.161	1.776	8.151	0.807			81	484	807	161	807		81	1.291	1.13	161	5.327
2.583	2.018	0.081	0.242	0.323		1.049	3.47	3.309	3.228	7.344		3.228	7.102	2.341	2.179	3.632		0.807	0.726	2.179	0.323	0.565		0.726	1.614	0.404	0.081	1.13			323	161	1.13	646	726		2.26	968	2.502	1.13	404
2.018	3.228	0.565	0.404	1.372		2.825	2.502	2.341	2.905	1.049		2.905	0.484	0.726	2.098	1.13		10.815	12.752	3.148	0.161	0.323		2.986	49.797	0.565	1.211	0.161			81	726	888	404	242		2.905	565	565	1.291	161
3.39	2.663	0.646	0.968	0.646		1.372	5.165	2.502	1.776	9.039		1.776	1.049	1.776	0.404	7.909		15.899	0.565	4.842	3.228	1.291		2.905	0.323	5.165	0.081	0.323			3.309	565	1.211	161	323		1.049	1.614	404	1.049	1.211
3.309	2.583	0.565	1.13	0.646		2.421	1.533	4.52	0.323	5.407		0.323	9.039	2.179	2.341	0.646		10.411	0.242	0.726	3.793	0.565		6.86	1.533	3.39	0.726	0.242			1.856	565	2.905	565	81		1.695	1.291	968	3.067	2.018
2.421	1.856	0.484	1.291	0.161		2.905	1.453	3.793	0.646	0.081		0.646	4.116	3.47	1.049	2.421		13.801	0.807	1.453	2.421	1.211		0.242	0.888	4.358	12.671	0.726			968	646	726	1.533	81		81	726	323	2.825	4.358
2.905	4.762	0.323	0.242	0.242		1.856	1.695	5.004	2.502	0.242		2.502	11.622	2.341	7.829	2.26		14.769	0.161	3.874	5.327	1.291		1.049	0.081	0.888	0.081	0.565			807	1.13	5.569	81	484		726	1.695	81	2.179	888
1.049	5.811	0.404	0.161	0.161		3.309	1.776	3.309	3.793	0.807		3.793	1.776	1.291	3.148	0.726		7.022	0.726	5.004	2.905	2.663		1.372	1.856	0.323	9.201	1.13			646	1.291	323	161	726		81	2.986	807	5.407	242
1.856	2.421	0.968	0.404	1.614		4.681	0.161	2.663	1.937	0.323		1.937	0.807	1.049	2.098	1.533		0.242	5.407	0.807	5.085	0.888		6.134	0.323	6.618	7.909	0.484			807	161	161	323	242		646	404	1.211	242	726
2.502	3.874	0.404	0.565	1.211		2.825	3.39	3.874	3.309	0.968		3.309	7.264	0.323	0.323	5.085		5.085	17.191	1.776	1.776	0.323		0.081	0.484	5.73	1.13	1.049			81	323	968	323	726		565	565	404	242	1.049
3.39	2.905	0.888	1.372	1.453		2.421	2.421	2.744	2.583	0.888		2.583	6.618	1.533	1.776	2.341		3.067	3.309	2.341	3.874	2.583		1.453	0.484	1.937	1.776	0.565			807	161	1.049	1.695	161		6.376	726	2.098	1.13	3.228
4.923	2.502	0.404	0.404	0.807		1.776	2.341	4.116	3.955	0.081		3.955	4.035	2.502	0.404	5.73		9.281	8.716	0.888	4.762	1.776		42.936	0.161	1.291	2.26	1.856			2.179	646	242	161	1.211		2.018	1.372	1.049	484	2.018
2.825	1.614	0.404	0.161	0.484		1.856	1.211	6.134	3.551	0.404		3.551	2.663	3.955	1.453	10.573		2.018	3.955	0.161	2.26	3.067		0.323	1.453	0.726	10.653	0.565			1.453	81	323	646	1.211		81	2.018	242	3.955	646
4.681	1.856	0.323	0.888	0.323		1.856	3.955	3.148	2.098	1.291		2.098	1.695	0.565	5.004	2.663		18.563	2.986	0.888	0.161	0.565		5.165	2.825	0.726	9.846	0.807			2.098	161	4.439	646	1.695		565	565	1.13	2.098	1.211
1.372	2.502	0.404	0.565	1.13		1.614	2.179	2.663	2.098	0.646		2.098	4.197	2.744	5.488	3.713		12.833	0.565	0.484	5.246	2.018		1.453	0.242	0.646	0.484	0.323			807	807	726	81	404		726	1.049	726	2.341	968
2.583	5.246	0.323	0.565	0.242		0.726	2.098	3.067	1.614	10.573		1.614	1.372	0.807	2.098	2.26		0.484	6.779	1.776	5.488	0.081		0.888	1.291	0.484	0.726	2.905			888	2.421	968	1.049	1.453		484	646	1.937	1.13	1.533
3.551	2.341	0.484	0.726	0.726		1.049	1.937	8.071	0.888	12.025		0.888	2.341	0.968	10.169	0.888		0.565	16.464	0.807	2.018	0.646		8.151	1.856	0.242	0.323	0.081			323	81	323	242	646		242	2.179	323	323	4.035
3.874	2.018	0.323	1.453	1.372		1.453	2.583	2.663	4.681	0.565		4.681	5.085	1.937	2.421	1.533		11.703	0.323	3.47	0.807	5.811		1.453	1.533	4.439	0.807	1.453			81	1.049	404	323	968		1.049	2.018	807	1.13	5.488
3.713	2.098	0.807	0.646	1.291		1.695	2.341	2.905	1.614	0.807		1.614	3.148	4.52	3.551	2.986		0.484	4.116	2.502	3.148	2.018		7.264	1.614	1.533	1.211	0.968			726	968	81	81	1.211		968	565	242	484	7.99
2.905	3.067	0.726	0.888	0.807		2.663	2.179	3.309	2.179	1.211		2.179	4.358	2.26	2.179	3.713		0.888	11.622	0.807	2.744	6.134		1.453	2.825	8.071	94.993	2.905			565	1.13	484	161	1.372		2.744	565	161	2.825	1.695
3.39	3.47	0.323	1.372	0.404		2.744	2.905	2.179	3.309	4.358		3.309	4.842	1.614	0.646	1.856		2.341	1.13	3.713	0.404	0.081		0.807	0.081	5.246	0.968	2.502			1.937	2.421	1.372	323	2.018		81	404	1.533	3.39	1.291
0.565	6.618	0.807	0.968	1.372		3.309	1.291	3.228	3.148	7.667		3.148	1.614	0.807	1.372	0.726		11.703	4.278	5.004	10.653	0.081		1.695	0.646	1.453	1.937	1.776			404	161	888	323	565		726	242	888	1.856	5.085
2.341	1.776	0.484	0.323	1.614		1.533	1.856	5.811	3.47	0.404		3.47	1.856	1.695	2.502	3.228		17.514	10.169	2.583	3.47	8.878		5.085	0.081	1.533	0.081	1.372			3.874	242	565	404	1.453		242	323	646	323	242
1.13	3.39	0.484	1.13	0.726		2.018	6.457	6.537	3.47	2.098		3.47	2.098	2.825	1.533	1.211		7.587	9.766	2.098	5.165	1.372		0.242	1.049	0.968	0.888	0.888			726	484	323	81	2.098		2.905	404	484	323	2.341
4.035	3.067	0.081	1.291	0.323		2.341	0.968	3.148	2.179	0.242		2.179	1.291	2.179	2.744	1.856		12.752	3.713	2.905	3.067	0.726		10.25	1.211	0.484	7.99	3.47			565	807	2.663	1.291	646		161	323	242	888	161
4.197	4.842	0.888	1.453	0.404		1.13	4.358	0.888	2.421	0.646		2.421	1.049	1.695	3.228	3.309		3.874	4.923	4.197	4.278	0.242		0.323	0.323	0.081	53.832	0.484			888	726	1.211	968	4.278		1.614	1.372	1.211	4.197	5.811
4.52	4.116	0.565	1.291	0.081		6.699	2.825	1.614	1.453	7.183		1.453	1.776	2.098	1.614	0.888		5.004	13.236	0.807	8.716	8.716		5.892	0.161	0.161	28.813	0.404			646	565	1.211	242	81		242	2.341	1.13	2.26	2.502
0.161	3.793	0.323	0.968	1.13		2.26	1.856	3.067	0.161	0.888		0.161	1.291	1.372	0.323	0.807		0.565	0.565	5.165	1.614	3.632		8.394	0.565	5.73	6.537	0.323			1.211	726	888	2.905	81		1.695	888	1.291	2.502	1.372
3.47	4.762	0.323	0.807	0.484		1.049	2.421	3.067	3.309	0.888		3.309	0.242	1.13	0.726	0.565		10.492	3.148	3.309	4.681	1.291		4.116	1.211	1.614	0.807	2.179			4.116	1.049	484	646	1.614		2.179	161	646	242	484
5.165	4.197	0.726	1.211	0.565		0.968	2.502	3.47	4.923	0.565		4.923	0.726	0.968	2.825	2.583		3.955	7.344	3.874	7.022	0.323		2.905	0.404	1.937	1.372	1.211			81	1.13	323	3.148	404		1.291	242	1.695	1.372	4.035
4.197	4.358	0.807	2.26	0.646		1.776	2.098	2.905	4.197	19.451		4.197	6.699	0.807	0.646	0.646		0.888	15.819	6.779	1.695	0.081		1.533	0.484	0.081	0.646	0.323			404	1.937	1.049	646	404		2.018	2.179	484	4.52	404
4.197	4.762	0.484	1.13	0.323		2.986	2.744	2.018	7.425	0.888		7.425	2.502	0.565	0.565	6.618		0.968	7.587	1.695	7.102	1.291		0.081	0.081	3.228	0.726	0.081			161	81	323	1.049	807		1.695	565	565	242	7.506
0.968	2.986	0.484	1.13	2.744		3.148	2.098	3.39	4.358	1.372		4.358	1.614	1.776	2.341	2.098		3.067	1.049	5.246	3.067	0.484		0.807	0.968	2.26	0.323	1.049			968	81	1.049	646	242		2.421	646	1.049	1.049	968
3.955	0.404	0.565	1.049	1.614		2.26	1.937	3.39	2.583	1.614		2.583	4.923	1.211	1.937	4.842		1.049	3.793	0.081	3.713	7.425		4.278	0.323	4.358	1.614	0.726			2.583	81	1.049	323	161		726	242	646	161	2.905
5.004	2.744	0.484	0.807	1.13		0.565	0.807	2.905	3.632	5.327		3.632	1.049	1.211	0.161	4.842		8.394	0.968	1.856	1.049	2.018		6.053	0.323	4.762	3.228	0.081			2.825	888	484	81	404		404	323	646	2.986	7.022
2.744	3.713	0.484	1.453	1.049		3.148	2.825	3.067	0.968	4.197		0.968	1.13	1.695	4.439	0.888		1.372	3.47	3.955	4.762	2.098		6.376	0.888	2.583	1.695	0.968			404	1.13	1.13	323	1.937		161	161	2.341	5.972	8.232
1.776	4.035	0.161	0.565	2.583		4.358	0.404	3.39	2.663	0.484		2.663	4.278	2.341	0.565	3.067		17.514	1.533	0.888	3.955	5.085		11.945	0.565	1.533	0.565	0.968			1.291	968	888	484	646		807	1.13	565	2.341	6.376
0.484	4.278	0.242	0.726	0.565		2.098	0.807	3.955	0.081	6.376		0.081	1.453	2.098	2.986	6.214		9.443	9.604	3.47	4.6	1.211		0.081	5.972	2.986	0.404	0.323			81	323	242	323	1.211		404	2.986	1.372	161	726
1.211	0.968	0.323	0.968	1.695		1.533	3.632	2.905	3.067	11.218		3.067	4.197	6.699	5.892	0.404		16.868	0.726	1.695	5.246	0.565		8.071	0.404	2.744	4.116	1.372			242	726	242	484	323		565	1.049	807	6.134	404
4.116	2.663	0.726	0.081	1.049		1.856	2.744	4.358	2.098	7.909		2.098	1.695	1.937	5.73	8.313		14.205	2.986	0.646	4.035	1.211		0.404	0.081	1.211	0.161	0.242			1.776	565	888	726	1.13		1.13	6.053	323	7.99	807
2.663	2.502	1.13	1.614	1.13		5.73	2.341	3.309	5.65	0.484		5.65	2.502	0.565	4.116	2.421		10.169	2.583	2.825	2.179	0.968		0.161	1.211	2.663	0.081	0.081			4.197	807	404	888	161		1.211	646	1.856	404	1.856
0.968	2.018	0.565	1.13	0.484		1.453	0.968	3.632	0.081	4.52		0.081	1.614	3.551	0.565	1.13		0.242	7.829	2.986	4.035	0.807		0.404	0.888	0.404	8.071	0.161			1.776	726	1.049	404	81		4.762	565	1.937	484	968
1.291	5.085	0.484	1.614	1.453		1.13	1.776	4.439	0.161	7.264		0.161	8.797	0.807	0.888	0.807		0.646	2.179	4.035	5.165	2.421		0.404	0.888	2.179	6.699	0.888			726	1.13	565	888	81		4.358	1.211	404	1.776	242
1.856	5.085	0.484	1.13	1.533		2.098	2.179	1.049	2.905	7.506		2.905	0.726	2.179	0.323	2.825		1.291	4.358	2.421	7.748	0.161		4.358	0.161	11.46	3.632	0.404			726	1.372	2.502	888	323		3.067	161	404	1.291	2.502
2.179	3.793	0.404	0.404	0.888		3.713	3.309	5.085	2.905	0.161		2.905	1.937	4.762	3.874	0.968		2.502	3.309	1.695	5.972	0.646		0.242	0.888	1.695	0.081	0.081			1.13	1.695	2.018	1.291	323		1.937	646	1.453	5.73	6.699
2.179	2.018	0.404	0.646	0.565		2.018	2.179	0.968	1.776	8.474		1.776	1.856	1.453	7.909	3.551		28.49	2.502	2.421	0.404	5.004		0.081	2.502	1.937	1.695	2.018			1.291	807	1.049	1.372	323		968	565	2.098	161	3.874
2.502	6.376	0.242	0.404	0.726		1.937	2.421	1.453	1.13	0.726		1.13	1.13	0.726	0.726	0.968		3.148	2.663	3.551	2.663	1.049		3.309	0.081	1.937	76.188	1.856			81	2.341	888	726	726		1.533	1.937	484	1.614	6.295
1.049	1.614	0.646	0.242	0.323		0.968	2.905	2.26	3.39	0.161		3.39	0.323	1.372	0.404	1.937		5.407	3.632	0.968	6.134	1.695		6.941	0.081	8.878	0.161	1.211			726	161	1.049	1.533	968		3.228	2.825	242	2.018	81
0.807	2.744	0.404	0.646	0.484		2.098	6.941	3.713	2.583	0.161		2.583	1.453	1.291	2.341	10.653		1.211	3.713	1.937	4.52	2.663		0.242	1.211	4.035	0.484	9.846			323	161	81	81	81		565	565	726	565	6.537
1.049	4.358	0.161	0.646	0.323		2.583	1.937	2.905	1.856	8.232		1.856	1.372	1.776	0.565	0.726		1.049	1.533	3.874	3.148	1.453		0.081	0.242	0.565	0.081	1.13			1.614	323	1.211	161	404		1.695	323	81	1.372	3.632
1.695	2.502	0.323	0.323	1.13		1.291	1.856	5.65	1.776	5.085		1.776	5.327	1.049	3.228	3.148		1.695	4.762	6.214	3.309	0.888		0.726	30.346	3.39	0.565	0.404			1.291	888	404	807	807		565	404	565	1.049	1.291
1.13	2.098	0.484	0.726	0.726		2.098	2.098	3.39	6.779	11.46		6.779	10.169	0.565	1.049	2.825		1.372	2.341	2.825	4.035	1.453		0.081	0.807	14.689	2.018	0.726			1.211	81	2.018	1.856	2.26		1.453	726	1.937	3.874	1.614
2.986	1.695	0.726	0.404	0.484		2.502	2.502	4.681	2.502	4.116		2.502	1.776	1.533	9.766	11.783		0.323	0.404	1.049	4.681	1.291		6.537	3.874	1.856	0.646	0.404			404	1.049	807	323	1.13		1.372	1.776	968	8.394	7.748
0.565	3.067	0.565	0.404	2.583		2.583	3.713	3.228	3.228	6.537		3.228	3.632	2.663	2.502	3.067		2.986	1.856	21.952	6.779	4.197		1.372	3.067	1.937	6.053	2.825			2.018	1.13	1.049	1.13	404		1.533	1.776	646	3.228	7.99
0.968	3.148	0.565	1.049	1.13		4.439	0.646	2.663	2.341	0.646		2.341	0.323	0.968	1.533	2.502		0.484	2.018	0.323	0.484	6.053		0.484	0.161	3.39	1.776	0.646			1.291	2.098	1.937	1.13	484		2.26	161	646	5.569	161
2.179	3.955	0.404	1.13	0.726		1.13	1.937	2.905	2.098	0.161		2.098	2.26	4.035	0.565	0.968		0.726	4.278	2.179	4.681	1.049		0.646	0.565	2.502	2.341	1.937			646	81	1.533	1.533	323		1.937	2.26	1.13	4.842	1.291
4.035	4.278	0.646	0.646	0.565		1.695	1.937	4.035	0.888	0.161		0.888	5.972	1.291	2.825	0.726		2.421	2.744	6.618	3.632	2.502		4.681	2.26	5.811	1.533	0.565			1.776	323	1.13	2.179	968		2.663	1.049	1.291	2.905	5.811
2.825	2.825	0.565	0.161	0.565		1.856	1.291	1.776	1.695	1.13		1.695	1.13	3.228	0.323	2.663		0.323	0.968	8.555	0.968	1.614		34.543	0.323	1.856	0.968	0.565			7.022	484	726	726	565		3.955	2.583	807	323	484
2.502	2.502	0.726	0.242	2.583		1.695	3.309	1.291	3.148	7.99		3.148	4.358	1.533	2.663	5.085		0.807	3.067	3.713	4.035	0.081		0.242	83.613	6.376	3.309	1.13			3.39	323	646	1.776	3.793		1.211	3.067	565	242	2.341
2.986	4.116	0.323	1.372	1.695		1.614	0.323	2.663	2.179	3.148		2.179	4.358	1.695	11.057	1.13		0.242	2.744	2.905	4.358	7.748		0.081	0.081	3.874	0.161	0.968			646	968	1.211	2.421	968		1.453	242	726	2.179	1.13
1.453	3.955	0.161	0.404	1.614		2.26	3.713	4.762	2.018	0.565		2.018	0.242	1.453	2.018	0.807		3.793	2.986	3.793	8.071	4.197		0.484	0.161	8.716	1.049	0.807			323	646	726	888	404		3.228	81	565	4.923	2.502
2.098	4.035	0.484	1.695	1.453		1.937	3.47	2.663	2.825	2.421		2.825	0.323	5.085	0.404	3.228		0.888	5.327	2.744	3.309	0.484		5.246	0.081	0.242	0.242	0.081			1.614	1.937	726	161	242		161	968	3.148	2.098	2.583
0.968	2.502	0.888	1.453	1.695		1.695	1.856	3.632	2.421	11.218		2.421	2.825	1.13	0.565	12.268		0.484	0.726	14.769	3.632	3.551		0.646	0.081	2.018	4.278	0.404			161	404	404	1.856	2.502		2.583	807	726	646	268
1.372	3.39	0.484	1.695	0.484		1.856	4.197	1.856	1.614	4.278		1.614	3.309	1.937	2.26	3.39		0.484	2.179	7.022	0.242	0.968		1.614	0.323	18.401	0.646	0.323			1.049	81	1.211	646	3.39		726	807	1.453	1.856	1.856
2.26	2.583	0.646	1.453	0.484		1.533	4.197	2.825	2.26	0.242		2.26	1.13	0.565	4.6	1.291		1.211	4.439	0.242	0.242	5.569		7.425	2.098	2.341	2.179	0.323			242	2.26	2.341	1.372	242		484	323	1.937	1.049	6.779
1.614	3.874	0.565	1.372	0.323		0.323	5.972	4.035	0.807	3.309		0.807	0.565	2.179	0.565	4.116		0.968	2.179	6.699	5.65	6.376		7.425	0.161	0.323	0.404	18.966			1.533	807	81	646	1.13		807	565	565	3.309	1.049
1.776	1.695	0.323	0.807	0.565		3.955	1.776	4.358	2.663	0.565		2.663	1.937	2.018	0.484	1.937		0.081	2.583	6.86	0.323	1.049		4.6	0.161	0.404	0.646	0.404			3.874	1.372	1.291	81	565		1.049	323	242	2.502	2.018
4.197	4.842	0.242	1.533	2.583		1.695	3.874	4.197	2.098	7.183		2.098	0.888	0.726	2.663	1.211		1.695	0.807	2.502	6.376	1.049		0.484	0.242	0.726	0.565	1.211			1.291	404	1.695	807	1.937		1.13	484	1.372	3.793	1.533
2.098	3.228	0.161	1.049	0.323		5.972	3.39	3.551	0.081	1.453		0.081	1.533	0.726	2.825	1.372		1.695	6.134	4.197	0.565	2.502		7.102	1.13	1.291	0.323	0.081			3.713	1.856	1.776	484	404		404	726	3.793	1.937	1.856
2.421	3.067	0.081	1.372	0.323		1.049	2.018	1.533	3.067	0.888		3.067	6.295	0.646	1.049	1.533		0.968	3.067	1.776	4.6	2.744		3.228	3.955	0.726	0.646	2.583			2.502	3.309	2.986	323	404		968	968	323	484	4.116
0.968	1.614	1.453	0.323	0.888		2.26	2.098	5.165	7.183	5.407		7.183	1.453	0.726	1.776	3.955		5.085	4.116	8.797	3.228	3.551		0.242	0.161	4.197	1.453	0.968			2.341	565	1.372	3.39	726		404	484	242	1.291	6.779
0.565	1.695	1.049	0.404	0.646		1.614	3.39	2.663	1.533	9.201		1.533	7.829	0.968	3.551	1.13		5.811	2.744	2.341	1.533	0.242		0.404	1.695	14.85	2.341	0.081			565	565	968	404	726		1.856	4.842	807	3.39	807
1.533	3.309	0.726	0.565	0.646		2.744	4.52	3.551	2.663	0.404		2.663	1.614	0.807	0.968	1.049		0.081	2.098	1.695	5.165	1.695		0.565	0.161	0.081	1.695	0.404			565	484	2.179	2.018	1.776		1.13	1.695	2.905	4.035	25.1
1.695	5.085	0.565	0.161	1.776		2.583	2.179	2.421	0.323	0.888		0.323	8.959	0.565	0.807	4.6		1.13	2.744	2.986	6.618	1.453		0.404	34.301	6.779	0.565	1.049			1.13	404	2.663	726	888		484	2.098	2.018	1.614	1.533
1.453	2.421	0.404	1.13	0.726		2.825	0.726	6.618	2.098	2.825		2.098	1.13	1.937	4.035	2.018		0.968	2.744	2.341	0.323	4.278		0.404	0.161	4.52	1.13	0.242			1.695	1.291	161	1.533	484		1.937	2.179	1.211	323	323
4.842	2.26	0.646	1.13	0.646		1.372	1.695	3.874	4.52	1.291		4.52	0.807	1.937	1.049	3.47		0.968	2.986	0.404	3.874	3.228		0.161	0.565	2.421	4.439	1.453			1.453	807	2.098	1.291	161		1.049	1.049	404	3.793	6.941
1.937	0.807	0.565	0.323	0.404		4.681	0.807	5.65	3.551	5.246		3.551	1.211	2.341	1.695	1.372		0.646	6.779	2.825	7.102	4.842		19.693	0.565	2.421	0.726	0.565			3.148	2.098	1.372	565	1.291		1.453	484	1.614	565	404
4.52	4.6	0.323	1.856	0.161		1.856	4.197	2.663	5.73	1.776		5.73	1.372	1.13	1.291	0.404		0.565	2.421	7.264	4.681	4.197		0.323	0.726	0.323	0.242	1.372			3.47	2.341	726	242	1.13		968	1.533	242	1.776	484
2.018	3.632	0.565	1.291	0.161		1.453	2.098	1.856	1.695	0.726		1.695	1.856	1.291	3.39	1.13		1.291	6.376	1.211	7.587	0.404		0.646	2.341	6.618	0.726	0.161			4.52	484	484	161	1.533		1.776	807	1.372	3.39	5.65
5.327	3.148	0.404	0.888	1.533		3.067	5.004	3.148	2.179	3.309		2.179	3.309	0.968	0.726	1.049		0.968	1.937	1.937	6.86	3.148		4.762	1.695	2.26	0.081	2.421			161	1.695	1.291	242	1.049		3.955	2.26	1.937	81	1.291
2.179	3.228	0.807	0.484	1.291		4.52	1.695	2.986	2.341	1.13		2.341	1.937	1.291	2.986	4.762		0.565	2.905	2.905	8.151	1.453		0.888	0.242	0.807	3.793	0.484			1.13	404	1.695	565	646		1.372	807	2.018	968	4.439
1.533	6.618	0.484	0.081	0.888		3.47	2.905	2.905	9.604	0.404		9.604	8.555	0.726	0.323	1.614		2.663	1.049	4.842	0.726	1.291		0.323	7.022	5.488	3.39	0.646			1.533	1.211	1.695	404	565		1.049	1.291	1.695	3.632	2.905
0.081	2.421	0.484	1.211	0.565		4.197	1.695	1.291	3.47	0.161		3.47	1.13	1.13	1.614	6.053		1.614	0.323	4.116	3.148	3.47		6.537	4.842	1.937	1.049	1.533			1.776	161	1.049	565	888		3.228	484	726	404	2.341
1.211	2.825	0.565	0.081	0.161		4.035	2.502	2.905	2.26	5.569		2.26	0.565	0.726	0.807	0.404		0.242	1.937	2.663	5.569	0.726		6.376	0.484	2.26	3.067	2.583			323	646	484	968	404		1.291	968	1.211	1.049	2.098
0.888	5.407	0.242	0.161	0.323		2.018	1.776	3.148	1.372	0.323		1.372	6.537	1.13	0.726	6.86		4.681	3.713	4.762	6.86	1.291		0.807	0.323	0.081	0.565	0.404			242	1.695	4.116	1.291	1.211		726	807	646	8.232	4.278
2.744	3.793	1.049	1.453	0.484		2.663	2.421	3.551	0.081	1.695		0.081	0.646	0.968	0.726	2.663		0.404	1.614	3.067	2.583	5.246		4.278	1.776	1.856	2.905	2.421			404	2.744	1.211	81	646		1.049	807	4.52	1.695	9.524
2.179	5.407	0.081	1.776	1.695		4.278	2.26	3.47	3.228	0.323		3.228	0.968	0.807	4.6	3.39		0.081	3.632	1.211	3.713	3.632		10.734	3.067	11.541	0.888	1.695			888	646	1.291	484	968		1.695	4.439	1.776	3.713	6.537
4.52	2.583	1.211	1.453	1.533		1.937	2.583	1.372	2.421	0.404		2.421	0.484	1.13	1.453	5.407		0.242	2.825	1.856	2.825	2.421		4.116	46.649	0.646	3.551	1.372			968	565	2.421	1.049	1.291		3.47	646	1.211	323	994
1.211	4.923	0.484	0.968	1.614		3.874	1.937	2.905	2.018	3.551		2.018	2.098	1.856	0.484	0.323		0.242	3.793	1.937	7.344	1.372		0.161	0.888	0.484	0.323	0.081			2.098	807	1.372	2.421	1.695		1.614	1.372	2.098	1.614	4.681
0.726	5.004	0.646	0.404	1.13		3.47	2.26	4.681	2.744	5.65		2.744	1.937	1.776	5.327	2.341		0.404	6.053	1.291	6.295	4.035		0.484	3.793	4.52	3.228	0.726			404	1.291	1.453	1.372	2.905		1.614	565	1.776	2.663	2.421
2.583	5.246	0.646	1.13	1.453		2.905	3.874	2.663	2.825	1.533		2.825	2.583	1.291	1.453	1.533		0.646	1.049	20.258	3.39	2.502		0.161	0.242	0.968	0.323	1.13			968	2.179	2.179	2.421	646		968	807	1.937	565	9.362
2.583	3.955	0.807	1.049	1.937		2.341	2.502	1.776	2.583	4.52		2.583	1.695	1.453	2.018	4.923		0.807	2.179	5.65	3.632	1.372		2.986	28.086	1.291	0.646	0.081			1.13	2.825	1.13	726	646		807	2.098	3.39	1.533	8.071
2.179	3.632	0.646	1.13	0.646		4.439	0.807	1.776	1.211	0.081		1.211	1.13	0.242	6.053	2.098		0.565	3.067	9.362	7.264	4.6		2.018	0.161	2.179	1.291	0.242			2.502	1.211	3.47	1.211	81		1.291	161	968	1.856	2.663
3.713	1.695	0.646	0.404	0.726		4.923	2.502	1.614	3.148	3.067		3.148	0.968	1.776	2.098	2.583		0.161	1.533	0.888	6.295	4.439		0.726	0.807	0.484	0.323	1.453			1.453	807	2.421	888	484		81	2.179	1.211	17.271	242
2.905	1.533	0.565	0.484	2.26		1.211	5.246	1.776	1.776	2.825		1.776	3.955	1.776	2.179	3.39		0.242	1.614	2.341	4.923	5.488		5.65	2.421	7.748	1.049	2.098			3.067	404	1.049	4.278	565		2.986	1.453	1.211	81	3.39
2.744	1.453	0.565	0.242	1.211			2.018	4.842	0.081	1.372		0.081	0.807	0.888	2.744	3.067		0.646	3.955	2.986	7.909	5.65		11.945	3.713	2.26	0.726	0.726			1.614	1.453	1.372	1.049	1.453		1.049	968	1.776	646	5.246
2.825	3.955	0.404	1.776	1.291			4.439	3.39	1.614	1.372		1.614	0.161	0.888	4.6	1.211		0.081	9.443	0.968	5.811	4.6		23.082	0.081	4.6	0.646	0.565			968	807	1.695	968	1.13		565	1.453	484	1.049	2.341
2.179	1.291	0.404	2.179	0.484			2.179	4.923	2.018	0.726		2.018	6.376	0.807	0.161	2.502		0.081	1.211	5.972	0.565	3.067		0.968	0.242	6.457	2.421	0.646			888	1.13	726	484	807		565	2.26	807	2.744	1.453
0.081	0.888	1.049	2.26	0.484			0.807	2.179	0.323	1.776		0.323	0.968	0.242	2.018	2.179		0.646	23.889	0.323	4.116	1.049		0.646	4.439	3.47	0.242	1.049			968	1.211	1.614	565	404		1.049	1.937	1.211	2.986	2.825
3.228	2.341	0.726	0.888	0.323			4.439	2.905	1.453	7.425		1.453	1.291	0.888	1.291	2.26		1.291	2.502	2.26	5.972	2.825		0.081	1.533	0.565	0.484	2.421			1.533	242	968	323	1.291		1.13	2.421	1.049	2.502	6.295
3.874	2.098	0.807	0.807	2.098			2.825	3.47	2.502	0.484		2.502	3.713	2.341	5.004	3.39		1.937	7.748	2.986	8.071	0.404		2.179	0.161	1.533	0.323	0.484			1.291	2.421	726	3.713	81		2.744	323	1.533	5.165	3.632
0.081	3.148	0.484	1.372	1.372			2.179	1.453	3.228	7.829		3.228	0.888	0.646	2.905	0.404		0.081	3.793	2.663	2.018	1.453		12.429	4.6	3.309	6.134	0.484			161	807	1.13	565	323		5.327	323	1.937	2.905	807
1.937	2.098	0.646	1.13	1.211			2.663	1.049	4.681	0.323		4.681	1.13	0.484	0.968	4.035		0.807	7.344	5.407	4.278	2.744		12.51	18.079	7.909	0.323	0.081			1.049	1.049	968	1.372	968		1.13	81	404	646	2.744
2.179	3.148	0.565	0.242	1.049			1.695	2.421	4.439	0.484		4.439	1.856	1.049	2.421	4.035		2.663	1.937	3.713	7.102	3.47		0.646	0.161	3.713	4.842	10.25			323	1.049	726	323	1.049		1.291	1.372	646	404	1.453
2.341	3.551	0.484	0.807	0.888			3.874	2.986	2.663	8.394		2.663	3.148	0.968	1.937	0.484		2.098	1.453	8.394	2.098	8.636		1.291	0.242	2.825	72.556	2.098			726	807	1.13	646	1.776		646	404	2.098	1.13	8.797
2.502	2.583	0.404	0.404	0.161			2.986	2.986	3.067	1.533		3.067	3.793	1.937	2.583	5.246		0.242	18.24	3.39	6.86	0.968		0.323	0.323	17.271	4.762	2.744			161	404	2.502	1.614	565		1.533	2.341	4.762	565	1.856
3.632	2.098	0.565	0.565	0.807			4.681	3.632	2.098	3.309		2.098	1.453	1.776	1.937	3.955		0.484	5.327	1.049	6.214	4.358		76.672	3.39	1.372	2.825	1.13			1.049	807	2.663	1.291	1.291		2.905	968	1.453	11.783	8.555
1.372	5.327	0.323	0.323	1.211			1.695	2.179	3.228	3.228		3.228	0.726	0.404	2.744	4.6		2.179	5.972	2.179	5.65	5.246		1.13	31.799	8.151	1.13	18.966			1.13	81	1.372	2.502	565		3.309	323	888	968	3.551
0.646	3.874	0.726	0.484	0.646			1.291	3.874	5.488	1.937		5.488	1.049	2.018	4.842	3.39		0.565	0.646	17.352	4.842	2.26		0.807	11.622	4.681	0.646	2.744			404	161	1.13	484	1.211		323	565	1.856	1.211	5.811
2.744	2.341	0.161	0.081	0.565			1.211	2.744	4.358	1.211		4.358	2.018	11.864	0.161	1.049		1.13	5.73	0.726	5.085	4.197		0.726	2.341	6.941	0.161	0.323			3.874	1.13	1.291	565	807		1.291	323	242	1.937	3.39
4.278	1.453	0.323	1.937	0.484			1.856	3.067	4.197	2.098		4.197	1.372	2.663	0.484	2.502		0.242	0.565	4.6	5.892	4.762		0.484	0.726	4.762	0.081	2.421			3.874	3.551	2.098	888	646		1.533	2.179	1.372	1.372	5.246
2.502	4.197	0.323	1.776	2.744			0.726	3.148	3.874	5.407		3.874	3.793	0.323	3.551	4.278		4.439	1.049	7.183	5.65	2.341		4.923	3.551	2.905	2.341	2.421			323	1.856	2.502	888	1.856		484	565	323	3.713	3.39
2.018	2.179	0.646	0.242	1.856			4.197	4.52	5.65	1.937		5.65	1.372	3.067	3.47	7.022		0.888	0.323	3.793	6.295	8.636		0.726	14.366	10.331	0.565	0.081			1.372	161	2.663	161	646		2.018	726	323	3.148	1.372
2.583	5.165	0.484	0.888	1.453			0.484	4.197	1.776	0.726		1.776	1.13	1.856	4.439	1.856		1.776	2.179	2.179	3.632	6.618		1.211	0.968	5.972	0.807	3.148			8.959	1.291	1.291	2.179	1.856		1.211	1.372	2.663	3.793	5.004
2.341	1.695	0.807	1.372	1.211			0.565	2.502	1.695	0.081		1.695	0.807	5.004	3.228	0.404		1.049	0.323	3.551	5.569	4.52		2.098	5.327	1.533	0.888	1.291			4.358	1.291	1.049	1.049	888		1.533	2.502	2.502	4.035	4.278
2.179	1.291	0.646	1.372	0.807			1.13	4.52	2.018	0.404		2.018	1.614	0.484	3.713	2.421		0.888	1.695	1.614	5.327	4.52		1.291	50.523	3.551	6.295	0.323			1.453	1.695	4.842	242	1.13		807	2.26	1.372	6.053	242
1.211	5.972	0.323	0.888	0.484			1.453	5.407	2.663	1.291		2.663	0.968	0.726	6.699	2.179		1.533	0.242	12.268	7.102	4.6		0.726	0.968	1.211	22.275	0.323			888	1.614	2.421	646	404		1.291	1.049	484	726	7.748
3.39	1.291	0.242	2.421	1.614			1.695	2.825	4.358	2.018		4.358	4.6	2.986	2.986	1.372		0.646	0.484	6.295	5.085	3.148		1.291	5.246	0.726	0.646	0.161			2.26	1.453	2.341	2.098	81		2.341	5.488	1.13	17.514	2.341
2.341	1.372	0.726	1.533	1.776			2.663	4.6	2.098	0.323		2.098	2.26	1.211	1.937	0.323		2.341	4.6	6.941	4.116	4.035		3.148	0.161	8.313	0.565	1.13			9.281	1.049	3.39	1.291	1.211		888	2.26	1.695	646	3.228
2.341	4.439	0.242	0.323	0.888			1.291	3.228	1.372	0.081		1.372	1.856	1.453	0.968	2.905		11.783	1.776	15.657	3.309	4.762		0.807	0.484	0.404	0.646	1.453			2.744	323	1.695	1.695	1.372		81	646	1.211	2.905	5.569
2.098	3.874	0.807	0.968	0.807			1.614	2.986	2.905	0.323		2.905	2.905	1.856	3.713	6.053		5.569	2.421	7.748	4.52	3.632		3.228	1.372	1.453	5.246	2.905			3.067	81	1.856	726	3.228		1.614	404	1.533	5.085	4.842
2.341	1.695	0.484	1.049	0.484			0.565	3.551	3.47	3.067		3.47	1.937	2.26	0.323	2.018		2.825	0.646	9.524	2.905	8.636		1.13	0.081	0.726	30.185	0.161			3.551	323	1.211	968	1.13		81	3.148	1.13	5.892	565
1.614	2.905	0.888	1.211	0.404			1.533	2.825	3.309	1.211		3.309	4.6	4.923	2.179	6.537		1.13	1.776	1.533	9.281	2.502		2.098	1.372	3.39	0.323	0.968			1.291	888	646	807	1.453		1.776	484	2.26	5.65	1.453
2.421	1.937	0.323	1.453	1.776			0.646	2.583	4.035	2.179		4.035	2.341	2.825	2.018	0.807		4.116	3.309	14.043	0.323	4.439		1.614	0.888	7.506	0.807	0.888			1.614	888	2.744	1.211	2.018		3.309	1.614	323	6.134	4.116
3.793	2.26	0.968	1.13	0.323			3.47	2.502	1.856	0.081		1.856	0.726	10.653	0.726	1.937		0.161	2.341	8.636	2.421	5.65		2.663	2.744	2.098	0.807	0.646			1.049	1.453	807	968	1.614		484	1.937	4.923	1.533	6.376
2.825	2.26	0.161	0.968	0.646			0.161	1.776	0.968	1.695		0.968	1.937	0.161	5.73	3.39		1.776	2.744	13.478	0.646	6.457		1.13	1.776	9.201	2.905	7.183			1.695	1.211	1.776	1.13	1.291		1.453	2.341	1.614	161	2.018
1.049	3.067	0.565	0.484	0.646			0.968	4.035	3.148	0.968		3.148	4.6	0.565	0.161	8.151		1.776	1.614	6.053	0.888	5.004		1.291	0.081	0.081	2.26	1.372			3.47	2.502	1.856	1.614	726		726	807	726	2.986	2.502
1.049	2.744	0.888	0.242	1.937			2.341	2.905	2.341	0.646		2.341	1.372	0.968	1.937	1.13		6.457	3.793	1.453	5.165	2.986		3.067	0.323	1.937	0.565	0.161			323	1.614	807	1.856	1.614		1.13	2.341	726	323	9.12
1.776	3.228	0.404	0.242	2.179			4.197	4.116	1.049	0.726		1.049	2.421	1.614	1.776	4.52		1.049	5.73	4.762	0.968	1.211		16.626	0.323	1.291	5.569	4.762			81	2.905	646	3.228	1.453		1.695	1.937	3.148	2.018	7.748
3.228	2.341	0.807	1.614	1.13				3.228	2.421	6.618		2.421	2.421	1.614	2.26	5.246		3.47	4.52	8.151	11.622	4.681		0.807	0.807	5.407	5.246	0.081			161	968	2.583	565	888		1.533	726	807	968	7.344
2.663	4.278	0.161	2.583	0.646				2.663	2.502	5.085		2.502	1.372	1.453	5.246	3.713		1.211	1.776	0.565	6.053	4.035		0.404	13.559	10.976	1.453	2.26			1.856	484	2.744	726	1.372		1.453	2.26	726	2.825	492
3.47	2.421	0.888	1.291	0.807				1.695	2.663	0.565		2.663	0.888	8.394	2.905	5.972		3.874	2.421	7.909	4.278	3.874		0.646	0.565	1.937	1.372	0.242			1.695	807	1.937	404	323		5.65	1.049	1.372	807	4.358
2.502	4.197	0.968	0.646	0.726				2.986	5.407	1.695		5.407	3.793	1.856	0.646	4.681		2.502	1.13	1.049	2.663	2.986		10.815	0.565	3.39	13.317	0.565			1.533	242	2.018	565	484		1.776	2.421	807	4.52	5.246
1.049	1.937	0.646	0.726	3.551				2.905	1.291	2.26		1.291	1.453	1.291	1.776	0.484		6.618	0.968	0.404	5.73	4.278		2.663	0.242	4.842	28.167	0.323			3.632	1.291	2.502	807	1.13		1.533	1.695	3.793	10.008	4.842
1.533	2.825	0.565	0.807	1.937				2.905	1.937	4.197		1.937	4.842	1.049	4.762	2.825		2.421	0.726	1.695	3.874	3.551		46.488	21.388	9.766	0.565	0.161			1.776	1.049	1.453	1.695	2.098		3.309	2.098	2.179	4.035	9.362
1.695	2.341	0.807	0.888	1.614				2.421	4.358	1.937		4.358	0.888	8.151	5.569	4.762		0.565	0.081	5.892	6.376	4.52		0.646	10.088	3.228	0.807	0.807			81	81	1.533	1.291	4.116		5.569	726	2.341	968	3.148
3.148	1.856	1.695	0.565	1.695				5.085	1.291	1.049		1.291	1.776	2.421	4.116	0.807		0.888	2.583	2.179	2.905	3.713		2.179	0.404	2.341	0.565	0.646			1.533	565	1.13	1.211	2.663		968	323	2.421	1.211	1.695
2.905	2.744	0.968	0.242	0.404				3.39	3.148	3.47		3.148	2.341	1.13	2.905	2.744		1.614	2.825	17.514	6.618	7.829		0.404	2.341	6.618	0.565	0.646			2.341	4.762	1.453	646	1.614		1.695	2.663	1.211	2.018	5.488
0.646	3.39	0.968	0.161	2.502				4.681	3.39	1.372		3.39	0.161	0.807	5.65	0.807		1.695	2.421	11.38	6.134	6.457		0.888	0.807	8.555	4.278	4.116			2.502	726	1.776	1.695	1.453		4.439	807	1.614	3.148	1.856
2.583	1.776	0.807	1.695	1.695				4.923	2.179	2.341		2.179	3.47	3.47	4.358	2.098		0.888	0.323	13.72	4.116	7.748		0.484	50.039	5.246	5.407	0.726			1.614	807	1.776	1.13	1.937		1.533	1.211	2.26	565	5.892
3.551	2.583	0.968	1.372	1.776				2.26		1.13			1.533	0.726	0.404	3.39		0.888	4.035	1.533	5.811	6.295		29.055	0.242	16.787	5.73	1.211			1.453	968	2.179	1.211	2.825		1.13	404	2.26	3.067	7.829
0.484	2.179	0.404	1.13	0.888				2.583		0.565			3.551	0.646	4.358	0.888		5.569	2.341	12.429	3.793	3.228		2.018	0.161	0.323	1.856	0.968			484	4.52	2.421	1.856	1.533		2.341	2.179	4.52	4.278	646
0.726	2.825	0.565	1.211	0.888				4.6		4.762			3.874	0.807	0.323	1.13		3.632	6.295	0.484	4.6	5.165		1.695	0.968	10.008	15.98	0.323			1.211	81	81	807	1.614		5.488	1.856	1.937	2.583	968
1.211	2.018	0.646	1.049	1.937				2.986		1.533			0.484	2.663	0.807	7.022		0.646	1.372	4.035	4.278	6.053		3.551	0.807	0.242	1.614	0.565			968	565	726	1.372	81		3.47	726	484	161	3.067
2.744	2.744	0.484	0.646	1.695				2.986		4.923			2.663	0.565	0.565	3.39		4.116	3.228	5.65	6.134	6.214		1.695	18.24	5.569	1.13	0.161			1.291	807	81	646	888		4.762	323	3.067	161	7.748
3.47	2.421	0.565	0.081	1.695				3.713		2.179			3.632	2.341	7.102	5.246		1.049	0.726	11.783	3.067	5.811		0.646	0.161	6.457	0.081	2.583			81	807	1.13	1.453	1.13		1.211	1.211	1.049	2.663	0.51
0.404	0.888	0.484	1.533	0.888				4.116		1.776			0.565	1.291	2.098	2.502		2.26	0.565	6.699	3.148	1.049		4.6	0.726	6.941	0.646	1.211			4.116	726	2.341	807	1.13		1.856	1.372	726	10.896	7.102
1.614	0.646	0.484	2.018	0.888				3.793		4.197			2.986	0.565	0.646	5.811		0.968	4.358	11.622	6.457	6.214		0.968	0.323	7.99	2.825	0.968			1.211	3.309	4.6	2.098	1.291		1.372	2.825	1.049	242	4.197
0.565	1.211	0.726	0.242	0.726				2.098		2.098			0.242	1.211	1.533	4.6		0.161	2.179	5.407	3.793	3.955		4.197	1.695	1.937	0.968	0.807			2.502	2.663	4.52	726	1.211		3.39	1.856	1.049	323	6.214
3.148	2.341	0.323	1.856	0.726				2.421		3.551			1.211	1.291	2.583	1.291		2.502	1.049	2.905	3.551	5.407		1.856	65.857	1.13	64.485	0.404			1.695	646	2.905	323	8.797		3.551	5.085	1.13	2.421	7.183
2.986	3.148	0.726	1.937	0.888				3.713		0.646			3.067	2.502	2.502	6.214		0.161	1.211	10.411	4.6	6.376		2.986	0.081	10.976	1.614	3.067			4.278	3.955	6.134	1.211	323		2.825	565	1.453	323	2.421
1.695	2.825	0.726	1.937	1.937				3.067		2.179			0.081	0.404	3.713	1.614		1.533	1.13	7.264	4.116	6.457		4.116	1.049	7.667	4.842	2.018			1.13	1.291	1.291	1.291	1.372		2.502	1.614	2.502	3.955	1.776
3.551	4.923	0.646	1.937	1.937				2.583		2.663			4.116	0.888	0.404	4.035		1.291	4.358	10.815	0.161	4.52		0.888	0.081	4.197	5.569	0.888			2.663	1.453	484	484	968		2.825	2.905	5.246	81	4.116
2.744	5.811	0.323	1.614	1.291				3.551		0.323			1.13	0.726	0.807	3.228		0.646	4.6	3.793	4.116	5.65		0.646	0.081	14.447	0.081	1.291			1.856	1.291	2.825	1.291	1.291		7.829	1.695	1.291	323	0.25
2.663	1.776	0.807	1.13	1.695				3.793		0.807			2.502	1.453	1.937	5.892		4.358	3.39	5.569	3.632	7.344		8.555	1.614	11.541	19.451	1.13			161	968	1.453	1.453	2.744		1.13	1.291	646	4.842	6.053
4.278	2.341	0.807	0.646	0.888				2.098		2.744			0.404	4.923	2.905	1.453		0.404	7.506	5.488	4.116	4.923		0.565	0.646	12.106	6.779	2.421			1.937	3.228	6.053	1.856	2.825		1.211	81	726	2.986	8.474
2.744	2.26	0.484	0.565	1.291				2.179		3.47			0.565	0.807	5.004	5.569		0.161	0.081	8.394	4.358	3.309		2.744	0.888	2.098	4.52	3.47			2.905	3.067	1.049	3.551	3.39		1.211	7.587	1.937	4.842	3.067
0.161	4.035	1.291	0.323	0.968				3.309		0.484			1.291	1.937	6.618	1.211		0.565	0.242	7.667	2.986	5.972		1.291	0.161	2.179	0.726	2.905			2.26	1.614	968	1.291	888		2.663	888	2.663	4.52	4.278
0.646	2.986	0.807	0.323	0.323				2.26		0.565			2.341	3.793	2.26	3.228		2.663	5.972	14.689	3.713	5.165		9.846	0.323	14.205	2.502	2.663			3.632	2.825	3.067	1.533	1.291		1.211	1.937	2.26	484	3.551
2.583	4.358	0.323	0.081	0.807				5.004		3.309			4.439	0.726	2.098	5.972		2.825	3.713	10.653	4.52	3.39		36.561	0.646	1.049	3.067	0.323			161	807	2.179	807	1.049		4.278	1.211	1.856	1.533	2.502
1.614	3.228	1.937	1.211	0.888				2.583		0.565			1.211	1.291	2.825	1.049		3.39	1.695	0.646	10.896	5.327		0.404	1.049	11.783	0.081	1.937			5.488	81	1.13	2.018	1.13		3.148	2.098	968	242	5.004
3.067	2.421	0.242	0.968	0.807				5.407		2.421			4.762	2.502	3.874	1.695		1.372	6.457	10.25	4.358	7.587		2.825	6.053	10.008	8.555	3.148			6.537	2.018	2.663	1.049	1.453		3.793	3.148	968	2.905	3.309
4.197	2.905	1.049	1.453	0.646				2.744		1.211			0.161	1.372	1.049	5.73		5.165	3.309	9.281	4.842	8.232		2.583	0.081	5.085	2.825	1.453			3.955	888	2.018	1.856	1.049		1.291	1.372	565	1.776	647
0.807	2.905	0.807	1.13	1.856				5.65		1.533			1.211	1.937	6.537	4.197		2.018	2.018	6.457	1.453	6.779		1.776	0.081	8.474	2.26	0.081			2.26	888	2.018	1.695	1.533		968	2.018	1.372	3.067	1.13
1.937	3.47	0.404	0.646	0.404				3.309		1.614			1.291	0.484	4.842	3.874		2.825	5.246	1.533	0.646	6.053		0.161	0.081	20.661	8.151	0.081			3.713	484	5.085	1.856	2.179		2.098	1.291	1.533	9.443	9.362
2.502	2.018	0.807	0.323	1.453				5.085		0.726			1.856	6.457	3.47	5.407		0.726	3.39	16.626	2.098	0.807		1.049	1.049	15.657	8.474	0.565			3.47	1.776	1.695	1.614	1.695		2.421	81	2.744	646	7.909
2.905	2.825	0.726	0.161	0.484				3.551		2.341			0.484	7.829	1.049	7.667		0.968	3.309	5.811	3.955	4.278		0.807	2.663	20.58	0.161	0.968			3.47	1.614	2.502	968	2.341		2.583	2.663	1.937	565	675
2.744	2.986	0.484	1.695	0.081				3.551		0.968			11.864	4.762	0.565	2.179		3.955	3.228	10.492	8.959	6.295		1.776	0.404	8.232	0.161	0.161			2.663	242	1.776	2.905	1.211		3.148	3.47	888	3.228	8.959
3.713	3.793	1.13	1.533	3.228				1.13		1.776			1.291	0.323	5.085	14.205		4.762	3.955	2.663	4.197	7.264		2.098	1.211	13.075	1.533	0.081			161	1.776	4.439	1.533	3.793		4.762	2.018	888	5.892	3.551
1.856	3.067	1.776	1.211	0.888				4.6		1.372			2.341	1.776	0.484	3.228		2.098	0.888	0.081	0.888	1.372		5.892	0.081	5.327	0.404	2.663			2.663	2.663	3.228	646	1.776		6.618	2.502	1.937	242	2.986
1.856	4.6	0.404	0.888	0.807				6.214		3.148			2.341	2.502	2.905	1.13		0.807	0.968	8.636	7.99	1.453		4.842	0.161	27.037	0.565	0.646			1.856	1.211	2.018	646	1.372		2.825	2.663	807	161	8.313
2.421	0.081	1.13	1.614	0.968				2.905		0.807			4.278	3.47	1.211	3.874		2.986	0.323	16.142	3.309	5.407		1.13	0.484	11.783	0.081	1.937			1.211	1.614	2.179	1.13	565		2.663	1.776	2.663	2.986	4.278
1.049	3.148	0.807	0.565	3.309				2.905		3.39			5.004	1.211	4.52	5.892		1.776	3.47	1.695	8.959	3.955		0.323	0.323	6.618	1.856	0.646			1.695	484	2.26	2.502	968		888	2.26	1.291	15.092	9.039
1.453	2.663	1.049	0.484	2.502				3.309		1.372			0.968	6.134	4.842	5.811		0.807	3.39	9.604	3.39	6.053		4.358	0.081	9.604	70.7	1.211			2.26	4.358	1.776	4.358	2.098		3.228	2.098	1.695	9.846	2.179
4.197	3.47	0.726	2.341	0.968				1.776		2.502			1.533	4.762	2.825	4.439		0.081	2.179	14.608	2.583	6.779		0.242	0.081	10.008	0.484	1.856			4.358	1.049	2.744	1.776	1.13		9.766	2.421	726	1.776	4.52
3.067	2.26	0.565	1.856	2.825				2.583		3.228			2.663	0.968	1.049	1.695		10.492	4.439	5.488	6.376	6.376		0.323	0.484	5.246	4.197	0.565			2.098	1.614	1.937	2.018	888		242	1.372	1.776	2.825	7.99
2.583	2.663	0.484	1.695	1.776				1.776		3.632			3.309	2.018	5.165	5.327		1.695	2.583	1.372	3.47	5.488		2.502	1.533	9.524	0.565	2.502			2.986	646	4.035	2.986	807		2.583	807	2.825	726	3.713
1.776	4.197	0.484	1.453	0.968				1.776		0.888			2.986	2.018	0.404	3.067		1.372	1.937	6.053	3.793	6.86		1.695	0.888	17.917	5.972	2.825			4.923	1.856	81	1.533	2.502		3.47	5.327	2.905	2.825	565
2.583	2.098	0.484	1.695	1.13				2.986		0.323			3.39	1.533	1.453	5.972		9.524	0.404	7.748	6.537	7.829		15.577	0.807	9.362	1.856	3.955			1.211	968	1.695	1.937	646		5.085	2.583	2.098	888	1.211
1.695	2.341	1.614	0.968	0.646				1.614		2.583			2.825	0.726	2.179	5.73		0.484	3.228	6.779	3.309	6.053		0.404	1.291	20.338	0.323	0.081			1.856	1.453	1.13	1.776	1.291		1.049	1.453	2.341	807	331
1.453	2.502	1.211	0.565	2.26				3.793		1.291			0.565	0.888	3.309	3.713		0.242	1.614	2.341	3.067	4.035		3.551	0.565	5.246	2.341	1.533			2.179	2.583	323	161	1.614		2.26	81	2.018	2.421	3.309
4.762	2.583	0.888	0.161	1.937				3.47		1.049			1.695	9.281	5.004	7.506		2.502	0.968	5.004	2.583	5.327		1.291	0.404	5.73	0.968	1.776			3.874	2.26	3.148	1.13	565		4.035	565	323	3.955	1.776
0.565	2.663	0.565	2.26	1.856				4.116		2.421			3.713	1.614	4.439	8.394		2.583	7.506	0.565	3.713	5.811		7.183	0.807	12.348	63.84	3.148			4.6	2.986	2.744	1.211	1.291		1.695	3.551	4.842	8.394	4.842
1.291	2.502	0.968	0.807	1.211				5.004		0.323			2.905	1.695	2.502	4.439		1.13	4.116	10.411	4.762	7.183		9.524	0.323	2.098	0.484	2.744			1.211	2.905	7.264	1.937	1.937		2.098	1.776	2.663	2.018	3.793
1.13	4.439	0.888	0.807	1.13				0.484		2.26			3.713	2.018	3.551	1.211		3.874	3.309	16.222	4.52	4.52		5.811	0.968	9.201	0.565	0.404			3.228	1.13	807	3.713	3.228		2.825	5.65	1.211	2.341	1.372
1.937	0.807	0.968	1.291	0.888				4.52		2.583			1.856	3.793	0.565	8.313		1.372	1.614	1.776	0.081	4.116		0.242	11.46	0.888	19.773	0.242			1.453	404	81	81	2.179		1.13	3.148	1.049	1.614	2.986
2.502	2.421	0.161	1.13	0.565				2.905		2.421			3.228	0.565	2.905	2.018		1.453	2.825	9.524	1.372	4.842		1.695	23.325	4.035	5.407	2.018			2.098	1.211	1.453	565	1.533		7.264	2.26	1.856	81	484
2.986	2.825	1.049	2.018	0.646				3.793		1.049			2.098	3.47	5.004	3.067		2.663	6.618	3.39	1.291	9.201		12.106	40.273	3.309	9.524	3.309			2.179	1.372	4.762	1.614	1.856		1.049	968	807	1.695	1.937
2.018	3.793	0.646	2.583	0.565				4.035		2.26			2.744	0.888	4.6	4.762		1.211	4.681	12.106	1.049	5.327		4.52	1.372	0.081	1.533	2.986			3.39	1.614	2.583	1.049	1.856		1.372	1.937	1.291	1.372	646
2.098	1.211	0.807	0.565	1.211				5.407		1.695			2.018	1.13	3.148	0.081		0.081	1.372	2.502	3.47	2.744		2.098	0.242	14.205	0.888	2.502			2.421	2.583	4.439	1.453	888		646	565	1.453	1.453	242
0.565	4.116	0.968	0.404	1.049				3.309		2.663			1.453	1.614	3.793	1.049		1.695	0.968	6.618	3.309	2.825		0.807	4.681	0.081	15.334	0.404			9.927	2.583	6.699	1.453	404		2.26	968	3.148	3.309	9.362
3.309	2.26	1.049	0.807	0.807				3.228		1.533			3.228	0.484	1.13	1.776		0.484	4.116	5.165	7.909	4.116		1.533	0.484	10.088	1.13	2.744			2.583	1.13	2.179	7.748	6.618		4.035	2.341	1.453	3.632	7.829
2.341	2.421	0.242	0.484	0.968				3.228		2.26			3.228	1.372	4.358	1.695		0.888	3.067	6.053	3.067	5.488		5.165	1.291	9.281	4.278	1.291			4.035	968	565	2.905	1.533		1.937	2.663	6.214	2.905	4.035
4.197	2.986	0.968	0.484	0.968				5.246		1.776			2.986	0.807	5.004	9.685		1.13	3.713	7.748	3.148	11.864		1.211	0.646	0.161	2.825	2.179			7.506	1.049	1.291	3.874	1.856		3.793	1.776	1.937	6.053	8.797
4.197	4.681	0.807	1.049	2.825				3.148		1.13			2.421	0.807	2.583	2.098		3.551	2.26	11.541	4.6	3.874		1.372	0.726	0.404	0.484	0.484			3.228	726	4.6	3.874	1.13		1.13	3.067	1.856	323	1.372
4.278	3.551	0.646	1.776	2.502				3.551		0.404			3.551	0.807	5.085	5.407		0.484	1.13	9.12	4.842	6.053		0.565	1.776	6.779	0.807	0.081			2.583	726	3.874	1.291	1.211		2.583	2.825	2.502	2.663	1.049
0.888	0.646	0.081	0.726	1.453				1.937		0.807			1.453	0.968	2.905	5.246		8.797	5.972	9.524	8.394	3.551		21.307	18.079	11.218	1.211	1.856			4.278	1.695	1.453	1.13	161		1.695	8.232	1.453	2.26	7.102
4.278	2.421	0.484	0.404	1.614				4.923		3.228			2.098	0.968	6.618	7.829		0.565	4.358	9.443	2.502	6.214		0.404	47.618	10.088	0.404	0.565			3.39	1.372	1.776	1.372	1.13		2.744	3.309	4.52	2.018	4.6
3.228	2.26	1.291	0.081	0.726				1.776		1.211			3.067	4.278	0.807	2.018		0.404	4.035	8.636	1.937	5.811		10.896	1.049	0.888	22.356	0.565			5.65	2.341	1.211	1.695	1.211		9.362	3.632	3.955	1.049	5.246
1.533	2.502	1.776	1.291	0.807				2.26		1.856			3.551	0.484	7.667	5.972		1.13	0.242	10.088	1.453	2.986		0.565	0.646	4.681	1.614	1.776			1.695	242	2.825	1.13	1.291		2.744	4.842	2.341	4.52	9.604
2.744	2.179	0.646	2.341	1.049				2.26		2.905			1.291	3.793	3.632	3.228		1.533	0.565	6.376	6.457	6.457		0.161	0.081	10.25	0.323	0.081			968	1.211	2.098	2.098	404		2.421	1.211	4.035	6.618	10.331
1.776	2.905	0.646	1.13	0.888				3.228		0.081			3.228	3.067	12.59	4.358		1.533	2.502	9.443	2.825	6.537		0.888	1.856	9.524	10.734	1.291			3.955	1.453	2.825	1.695	807		1.211	1.453	726	7.587	1.049
0.323	2.663	1.13	1.291	0.484				3.632		1.291			5.65	3.067	5.407	1.291		1.776	2.018	6.941	1.13	3.955		1.533	1.049	1.533	0.646	2.986			1.211	3.148	4.762	2.26	2.502		3.47	1.695	726	1.776	4.681
1.776	3.148	0.968	0.242	4.842				1.13		1.776			1.372	6.537	5.488	1.695		1.049	5.165	9.685	5.65	4.681		0.161	0.323	0.888	1.856	1.13			1.533	1.049	242	2.502	2.018		4.52	81	484	81	5.165
2.825	4.278	1.049	0.484	0.565				1.291		1.453			1.695	0.726	1.533	3.874		0.888	2.098	9.604	3.551	4.762		0.565	0.646	9.362	5.327	4.116			2.421	1.695	4.197	1.533	484		2.583	2.26	1.13	3.067	6.699
1.211	2.905	0.242	0.807	0.726				3.793		1.937			5.569	6.295	2.583	5.972		3.309	2.744	10.896	15.173	2.905		10.331	0.807	9.846	0.807	0.242			4.842	2.26	2.905	1.291	2.018		726	8.394	2.018	4.762	815
3.551	2.421	0.646	0.161	0.646				1.695		0.242			2.421	3.955	7.022	6.941		1.211	1.776	10.573	3.551	3.713		2.341	0.161	0.081	2.26	2.744			5.73	2.663	2.421	1.453	3.713		1.372	1.937	1.776	242	7.99
2.098	3.713	0.726	1.614	0.081				3.632		2.663			4.762	1.372	4.116	1.13		1.695	0.726	6.86	2.986	6.134		6.779	0.323	18.886	0.888	0.968			3.39	5.73	1.211	81	1.291		2.26	1.695	1.776	3.067	5.407
5.407	2.583	0.968	0.888	3.793				2.825		1.533			3.47	6.295	1.614	5.65		0.807	3.874	3.874	1.13	3.955		0.081	55.688	12.025	1.453	8.313			3.309	888	1.695	1.937	1.937		2.663	2.341	3.067	3.228	88
0.565	3.228	0.565	1.695	3.309				5.407		0.323			2.986	0.323	0.646	1.049		0.161	2.905	3.955	5.407	3.793		0.242	2.825	12.025	2.583	2.421			1.856	726	5.327	4.842	807		807	1.856	2.26	4.116	647
2.663	3.39	0.726	1.776	2.744				2.986		1.13			1.695	4.52	4.762	6.053		2.341	2.018	6.457	0.968	4.681		0.323	1.049	7.344	2.421	1.049			1.937	3.793	3.632	1.049	2.26		3.309	5.811	3.228	7.183	218
2.986	3.067	1.13	0.807	2.744				1.049		2.502			0.565	2.341	1.372	5.892		1.049	2.583	12.429	1.776	3.309		1.614	0.565	8.716	1.533	4.52			2.26	3.551	2.905	807	3.148		1.13	3.874	2.421	949	7.667
2.744	1.533	1.372	0.323	0.807				4.035		1.695			2.825	0.484	1.776	6.376		1.533	3.955	0.323	13.075	6.214		2.018	1.211	5.65	4.116	3.551			81	3.228	3.148	888	1.049		5.73	2.098	3.228	646	222
3.39	2.825	0.888	0.726	0.968				2.502		1.211			2.098	1.13	8.716	4.923		1.856	1.453	10.008	3.228	3.067		1.049	0.161	3.551	11.783	6.457			4.358	2.421	6.295	2.663	1.695		3.067	2.744	3.713	12.671	3.551
3.47	1.614	0.404	0.242	1.13				5.488		1.614			3.228	4.358	4.842	3.955		1.776	2.26	10.976	2.018	6.295		1.453	0.323	16.061	1.049	3.39			4.035	6.86	1.13	646	3.228		3.793	2.583	2.905	2.018	968
2.502	2.341	1.049	0.161	0.968				3.39		1.453			3.228	1.856	4.762	4.842		0.161	2.583	10.008	1.533	5.488		3.148	0.242	0.646	24.212	5.65			2.905	6.779	2.26	2.018	3.228		646	4.035	3.874	11.057	173
1.533	0.726	0.323	0.081	1.13				3.309		1.453			0.888	0.646	4.358	1.695		1.13	2.502	1.856	0.968	4.116		2.663	9.846	27.763	1.049	2.502			5.488	1.856	2.502	1.453	3.632		3.713	2.825	2.341	1.453	8.636
2.583	1.533	0.646	2.744	0.888				3.309		2.018			2.905	5.892	6.618	0.323		0.484	8.878	5.569	2.502	4.116		2.825	8.151	2.341	2.905	3.632			5.65	2.986	2.421	1.776	1.211		2.986	2.663	5.246	161	4.278
3.228	2.502	0.888	2.179	1.372				4.923		0.726			6.134	1.614	3.309	4.358		1.372	2.663	12.268	1.13	3.228		1.291	1.372	1.13	1.049	1.614			6.779	3.067	4.439	1.695	726		565	1.937	2.179	2.098	6.376
1.695	1.372	1.695	1.856	1.13				7.344		1.776			4.681	2.825	3.39	9.039		0.081	4.278	8.716	18.563	2.502		2.098	1.13	3.955	0.968	2.502			5.73	1.291	5.892	2.098	1.937		3.713	4.035	3.148	4.762	4.681
1.211	0.807	0.726	1.695	0.323				5.165		1.614			2.986	4.197	4.842	1.291		0.242	1.856	11.864	2.341	11.057		0.888	0.161	7.183	1.695	0.404			3.47	1.049	2.502	565	2.179		3.47	1.856	3.067	1.372	2.583
1.291	3.228	0.646	1.291	2.905				1.695		1.856			2.26	0.968	5.165	1.291		0.323	1.776	9.927	3.228	5.892		2.905	1.211	2.905	32.606	2.018			242	3.874	3.228	3.47	2.825		1.291	3.067	2.26	5.73	4.842
3.874	3.39	1.211	1.533	2.421				2.502		2.179			2.018	1.856	1.453	2.986		0.888	2.905	1.453	2.26	4.197		2.421	1.291	0.404	26.553	1.695			2.502	3.309	2.986	2.341	2.26		2.825	2.098	1.533	323	9.281
2.663	1.614	0.968	0.646	1.695				3.632		2.341			2.825	0.807	2.421	4.6		0.888	4.681	9.685	10.169	4.842		63.598	0.565	0.161	1.856	4.035			2.341	3.874	484	1.695	1.049		8.716	4.762	1.453	404	331
0.484	1.695	0.968	0.968	1.049				3.955		0.726			0.726	1.533	0.968	4.358		0.726	2.905	6.214	2.583	0.161		0.161	0.323	7.587	0.646	1.776			2.663	2.018	1.856	2.098	1.291		1.211	2.905	2.905	1.856	1.049
1.372	2.986	1.695	0.404	0.726				2.26		1.453			3.47	3.874	1.453	2.744		0.081	2.986	0.726	2.905	0.888		24.697	0.323	9.524	0.888	2.018			4.6	1.695	11.703	1.13	1.533		6.053	5.165	1.614	3.309	6.779
3.39	2.905	1.453	0.807	0.323				3.632		1.614			3.551	0.646	3.148	4.035		0.484	2.098	0.807	5.73	3.632		0.807	1.211	18.401	2.986	4.278			1.049	968	2.098	6.86	2.421		1.211	1.291	1.453	3.47	807
1.776	2.825	1.13	1.776	0.404				1.856		1.211			2.341	6.457	5.327	5.811		0.242	3.067	8.232	0.323	8.394		0.726	0.646	0.081	2.421	0.726			3.713	646	2.179	1.695	5.892		3.632	3.228	3.309	5.246	1.533
2.986	2.986	0.242	2.502	4.6				3.713		1.533			1.453	2.905	5.65	2.986		0.242	1.776	0.565	2.502	11.218		2.26	1.372	0.242	1.049	0.888			2.502	2.583	7.748	1.533	1.049		2.502	8.151	404	1.937	896
2.179	2.663	1.13	1.695	2.179				3.39		0.807			3.551	0.404	5.085	5.488		0.242	4.116	0.242	2.502	4.035		0.565	22.679	0.404	2.583	4.923			4.6	1.937	1.049	242	3.148		1.776	2.583	2.098	1.372	2.26
0.726	2.986	0.726	1.291	1.937				2.663		1.211			4.116	1.049	0.646	5.085		0.081	4.278	5.811	2.905	9.281		1.211	1.291	4.035	1.291	0.081			3.228	1.533	5.488	1.372	2.179		646	1.211	2.018	7.587	541
2.905	4.197	0.807	0.323	1.614				2.825		1.533			1.453	9.362	0.484	2.905		0.968	2.986	2.098	2.663	3.067		1.211	0.807	7.102	66.1	3.39			2.341	4.116	3.47	1.291	726		2.26	2.018	6.618	3.39	1.291
2.663	2.825	0.646	0.404	0.726				2.986		2.018			2.905	3.874	4.842	7.425		0.565	3.874	2.098	0.404	2.986		0.161	0.807	0.161	0.565	1.614			1.13	1.776	3.309	1.372	646		7.667	4.278	1.614	6.618	2.502
0.323	3.632	0.565	1.856	0.888				2.905		0.323			3.148	4.52	4.197	5.972		0.646	3.955	2.098	3.309	2.421		7.022	0.565	0.081	0.484	0.565			13.72	2.502	2.26	1.049	807		7.022	2.583	4.278	12.752	646
1.372	2.986	1.13	1.937	2.098				1.776		0.807			3.067	4.52	4.116	1.695		1.13	8.959	15.657	2.825	6.376		22.921	0.323	0.646	3.148	0.323			728	161	4.358	2.663	1.049		1.695	4.6	2.018	10.734	7.425
3.148	3.309	0.081	2.341	1.291				3.309		2.502			2.26	1.13	4.842	4.681		1.049	2.905	2.583	5.327	3.713		2.179	1.453	19.047	0.726	0.323			3.067	1.937	4.52	2.26	1.695		0	11.299	1.937	1.049	5.085
2.502	3.067	0.807	1.13	0.404				3.067		2.421			2.502	0.081	5.165	3.148		0.565	5.65	6.699	2.421	3.228		1.856	1.211	14.366	6.053	6.537			7.829	1.937	5.085	726	1.372		484	5.569	1.13	2.179	6.457
2.018	2.421	0.404	0.565	0.888				4.681		2.179			2.341	2.663	2.905	4.439		0.565	2.341	6.053	1.211	2.663		3.874	7.102	15.012	1.372	0.081			3.148	2.098	3.228	2.744	2.018		8.394	2.018	2.098	3.632	9.281
2.179	1.453	0.807	1.856	1.13				4.358		0.646			1.372	0.646	3.632	1.937		0.161	3.632	2.26	0.646	6.457		0.646	12.671	3.713	3.309	1.453			4.439	2.26	888	565	888		2.583	3.874	3.955	5.407	4.923
0.081	3.228	1.453	2.26	0.646				2.26		1.695			2.744	3.148	3.793	9.201			1.372	14.447	2.986	2.341		1.211	5.569	17.917	0.726	0.484			5.327	2.502	4.681	2.421	1.453		3.39	2.825	1.533	646	917
2.502	3.309	0.726	2.502	0.968				3.067		2.179			2.179	5.004	1.211	7.264			4.278	11.46	2.098	3.228		0.161	1.13	10.573	1.049	2.583			8.071	1.614	1.776	3.955	3.148		4.035	1.937	3.551	81	531
3.067	3.39	1.049	0.807	0.807				2.905		1.695			1.211	0.404	0.807	5.811			4.762	2.905	3.148	3.713		0.081	10.976	0.404	2.098	0.888			1.937	3.148	1.13	1.453	3.148		5.569	1.695	5.407	2.825	2.744
2.179	3.067	0.888	1.211	2.098				3.148		1.695			5.004	1.049	0.565	1.372			1.695	4.681	3.793	4.116		1.856	0.888	3.228	6.537	2.098			10.331	1.695	1.856	2.098	2.26		323	3.228	5.569	2.179	11.138
1.695	3.874	0.968	1.291	0.968				4.035		0.161			2.663	3.067	2.583	0.807			2.179	6.295	2.421	2.986		2.341	0.807	12.348	0.161	1.937			5.73	1.856	2.26	968	2.421		2.744	3.955	2.986	4.842	9.039
1.614	1.13	2.502	0.726	3.228				2.986		0.242			2.502	3.874	7.344	1.695			2.583	8.555	18.886	4.278		6.779	3.309	32.364	2.502	2.421			4.762	2.26	1.614	2.341	3.632		5.246	3.067	6.941	888	968
3.47	1.614	0.968	0.888	2.583				4.035		0.968			1.856	1.695	3.874	7.344			2.179	5.73	3.47	8.959		0.323	1.533	0.726	0.807	3.793			173	726	3.39	3.39	2.825		7.667	5.488	2.663	1.049	161
5.73	3.067	1.776	0.404	0.646				1.533		1.856			3.148	0.726	3.39	5.085			2.098	9.524	2.26	1.533		1.291	17.998	11.783	1.937	1.372			3.632	484	4.762	1.13	2.663		2.583	2.26	2.663	81	565
1.614	0.081	1.13	1.13	1.049				4.035		1.13			1.695	0.323	2.26	2.26			4.035	6.779	1.453	0.404		2.744	1.049	12.833	0.565	0.081			2.744	6.376	3.955	1.776	726		1.695	484	1.372	4.116	5.407
0.242	1.372	0.323	0.323	0.484				3.228		0.807			3.309	2.179	3.793	2.905			2.502	3.39	0.484	3.309		64.243	73.444	3.713	2.26	5.892			10.815	3.47	3.228	3.39	2.502		9.604	3.228	1.856	1.453	12.51
2.018	1.211	1.049	2.583	1.937				1.372		2.502			2.744	1.291	3.309	4.035			1.937	2.502	1.291	0.484		2.905	2.986	0.081	2.018	3.47			10.573	3.955	5.407	4.035	1.453		4.842	5.246	2.018	2.341	13.155
1.13	1.533	0.807	0.323	2.583				2.825		2.018			2.986	4.681	4.681	5.246			5.488	8.071	9.12	2.905		37.448	1.533	12.671	1.695	0.807			5.327	5.085	3.713	1.211	2.098		2.341	3.551	484	5.246	3.551
0.565	1.614	0.888	0.646	1.614				4.358		1.937			0.565	0.646	2.018	3.39			3.47	13.962	2.018	7.667		0.726	1.533	10.896	11.138	2.26			5.085	1.211	6.134	888	2.26		6.376	3.47	7.183	2.018	1.13
1.291	4.52	0.404	0.484	0.807				3.39		0.968			1.291	2.744	4.681	5.892			1.695	8.636	18.079	3.39		1.695	3.148	1.937	2.26	1.13			5.73	1.856	968	2.179	161		4.035	4.278	2.26	3.39	2.341
2.744	3.551	0.242	0.404	1.049				2.583		0.807			2.905	3.955	4.197	2.825			1.453	0.161	0.404	4.6		3.067	0.404	14.608	0.323	2.663			2.905	646	1.211	2.098	2.583		2.744	1.291	2.986	14.043	9.362
2.583	2.421	0.404	0.565	0.726				5.811		1.856			4.278	3.39	2.26	5.085			5.407	7.506	3.39	4.6		3.551	1.13	1.049	2.583	1.695			3.632	2.018	5.004	2.986	1.533		3.551	4.035	4.035	323	11.945
3.713	1.049	1.13	0.404	0.565				3.148		1.291			1.614	3.309	4.439	3.309			3.309	0.081	1.453	15.415		1.695	1.856	0.242	0.242	7.183			3.955	2.179	4.439	2.502	2.098		1.776	2.744	3.228	1.13	5.892
0.646	0.888	1.13	0.161	2.179				3.309		1.453			0.968	6.941	4.923	0.404			2.421	6.618	2.421	8.797		1.533	2.018	12.994	13.801	0.161			10.411	3.793	3.551	807	1.937		10.815	7.022	3.551	3.309	726
1.13	2.421	0.888	2.663	1.291				3.067		1.776			1.856	5.569	6.134	4.358			0.565	7.506	1.856	2.502		1.291	17.514	6.457	7.909	0.807			5.892	2.744	2.583	3.39	2.098		2.905	3.47	5.972	2.098	5.327
0.968	1.614	1.049	2.018	0.888				4.52		1.13			1.695	2.341	0.968	8.394			7.022	1.453	0.565	0.646		7.829	6.537	0.242	4.52	1.291			726	3.47	3.713	1.13	1.372		3.632	3.39	1.856	11.541	6.295
1.13	4.035	0.646	1.614	1.13				4.116		1.856			3.955	1.453	4.116	1.291			0.081	4.439	2.583	2.825		2.744	0.323	22.517	1.13	0.807			3.47	2.421	2.098	2.583	2.26		9.281	3.39	4.6	3.148	2.26
2.905	5.73	0.726	0.968	1.049				2.905		1.614			1.937	0.726	0.968	4.116			2.26	8.716	0.968	1.291		0.888	1.372	1.13	1.937	23.889			1.049	1.291	6.779	2.421	2.502		3.228	3.632	1.856	4.681	4.035
2.825	1.049	0.404	1.13	1.13				4.358		0.565			1.614	3.793	6.214	7.425			3.39	5.327	1.211	21.226		1.372	0.323	0.323	9.443	0.081			2.098	2.663	323	1.13	2.341		3.551	807	1.372	10.492	3.309
1.614	0.242	0.404	1.533	1.291				3.228		0.161			0.726	1.372	2.341	4.278			2.583	6.295	1.372	5.407		8.313	0.807	6.134	0.726	0.565			2.744	4.278	4.197	3.228	3.067		1.453	1.776	2.018	20.096	14.527
2.905	2.663	0.726	1.13	1.211				4.197		0.323			2.905	1.695	3.47	0.404			2.098	6.699	1.453	2.744		1.856	1.856	6.295	7.264	2.179			7.829	2.018	3.632	2.421	4.842		2.825	1.291	2.179	5.004	911
2.825	2.179	2.018	0.565	0.484				2.744		1.291			1.614	2.018	0.726	5.407			2.26	3.632	3.632	3.551		13.801	1.453	22.84	1.856	1.856			2.663	1.937	968	5.65	2.744		3.551	5.246	2.744	2.744	3.632
1.856	2.825	1.049	2.018	0.161				7.102		0.968			1.856	4.6	5.811	4.681			2.744	4.439	1.049	2.583		0.565	1.856	8.394	2.098	1.291			8.232	968	1.533	807	1.372		5.327	4.278	5.165	81	9.039
2.421	4.6	1.695	2.098	2.986				4.278		1.533			2.179	1.453	0.565	4.52			1.856	5.892	1.856	5.488		2.905	19.208	1.937	0.242	2.179			7.99	242	1.614	888	1.13		6.537	7.425	646	404	756
2.26	3.793	0.404	1.453	2.26				2.098		1.695			3.713	2.502	3.955	6.053			4.358	4.842	2.583	14.043		0.726	0.161	1.453	7.022	6.295			3.955	4.116	4.197	1.13	2.341		4.762	3.39	1.695	2.018	1.776
2.421	2.905	0.726	2.26	1.372				3.874		1.291			5.004	3.632	4.923	0.888			2.341	5.407	8.151	0.565		1.614	1.614	1.614	0.484	9.685			2.825	2.018	7.506	2.179	1.856		3.228	3.551	2.018	9.12	4.762
1.695	4.358	1.049	0.968	2.421				3.713		0.888			2.179	3.551	3.39	3.955			3.067	9.12	3.47	1.453		1.291	2.26	16.464	0.726	13.801			81	2.018	1.211	1.614	2.26		3.793	5.407	1.533	10.088	6.618
3.228	1.049	0.888	0.081	0.807				3.713		0.726			0.807	1.776	3.148	5.65			1.372	13.882	3.47	2.825		1.533	7.748	0.323	0.242	2.744			10.25	3.067	161	2.018	726		3.793	2.744	1.695	484	8.313
3.632	1.856	0.484	1.614	1.372				2.502		0.161			1.856	0.565	0.968	7.506			1.049	7.344	0.565	1.937		1.049	5.65	10.25	0.726	2.583			1.776	1.211	2.825	1.13	3.47		5.327	4.116	3.874	1.291	285
1.937	1.695	0.726	1.211	1.13				4.358		0.968			1.372	5.65	2.098	2.663			1.291	3.148	0.646	2.098		0.081	2.583	18.079	0.081	5.972			4.035	1.291	4.52	4.278	1.372		6.214	3.39	2.26	807	7.909
5.246	3.551	0.565	3.228	0.807				5.246		1.13			2.502	3.47	1.937	2.26			3.067	8.474	2.905	1.13		0.726	21.145	0.484	2.26	1.13			323	1.049	4.52	3.309	2.421		3.309	161	1.856	2.502	968
1.776	0.323	0.726	2.098	2.26				1.533		1.856			3.067	1.372	4.358	4.762			7.909	3.309	0.646	3.067		0.161	0.242	11.783	1.453	1.776			5.327	4.52	1.695	3.47	3.47		7.99	5.972	1.695	1.372	807
1.372	1.049	0.807	1.13	1.533				3.47		1.776			2.744	4.116	0.161	1.856			3.955	6.537	0.726	2.825		0.807	1.776	2.018	3.067	2.26			81	3.309	1.614	2.421	2.179		10.815	2.341	2.744	1.453	222
1.372	1.291	0.646	2.018	0.888				4.197		2.018			0.807	1.211	4.035	3.793			2.421	6.053	2.663	3.148		1.776	0.323	21.065	0.242	6.295			3.309	6.457	1.372	2.583	4.035		4.842	2.502	5.165	2.26	12.671
0.646	1.937	1.614	1.453	0.726				1.372		0.161			0.161	1.13	7.425	1.614			5.488	2.421	0.646	2.905		1.049	6.134	1.372	28.893	2.583			4.278	1.614	5.569	3.955	2.018		4.439	2.986	2.825	3.228	9.443
0.807	2.583	0.484	1.291	1.695				2.341		0.323			2.502	2.26	2.098	3.309			3.955	0.161	1.049	0.484		55.608	0.081	8.555	1.049	2.583			1.776	1.614	807	2.825	6.457		2.26	1.776	5.65	7.667	13.155
0.968	4.035	0.968	1.372	1.856				2.098		1.291			3.632	0.807	3.874	2.986			4.035	2.018	1.211	11.138		0.646	0.807	6.457	0.081	4.278			4.358	2.26	323	2.825	3.39		1.211	3.148	2.744	6.86	12.671
2.825	1.533	0.968	0.242	1.453				4.116		0.081			0.565	5.892	2.421	8.797			2.26	11.46	1.13	2.663		5.811	1.776	0.081	1.776	0.081			81	4.278	4.197	807	2.663		4.358	565	5.569	5.811	1.291
2.26	2.26	0.968	0.081	1.211				2.179		0.807			2.179	7.829	2.341	3.148			4.278	0.968	1.13	1.695		5.407	7.829	0.161	0.081	0.081			5.569	3.632	4.197	726	2.744		9.443	1.695	1.937	5.892	3.39
0.968	3.067	0.726	3.551	0.968				0.968		1.13			2.583	1.453	3.228	4.923			0.968	0.726	0.807	7.667		4.197	0.404	5.327	0.968	4.762			3.39	2.341	6.457	2.421	2.502		7.264	4.358	3.228	12.025	646
0.807	0.968	0.968	2.341	0.807				4.116		0.726			2.018	2.26	4.681	6.134			2.905	5.165	2.341	0.807		1.453	2.825	0.323	26.311	0.646			404	1.13	5.407	1.614	2.986		4.358	6.214	4.681	1.049	4.923
2.583	0.807	0.888	0.807	3.47				3.148		1.211			1.856	6.053	0.646	4.681			1.937	5.892	1.776	2.179		1.049	0.565	10.088	6.134	4.116			242	1.776	10.411	2.26	3.228		4.116	2.421	3.47	4.762	1.937
3.793	1.291	1.13	0.565	2.26				4.52		1.695			2.26	0.323	5.327	3.793			0.323	21.307	1.533	2.663		0.565	0.081	3.955	0.323	1.695			3.632	1.291	4.358	2.341	1.856		3.39	2.663	3.955	3.955	9.12
3.551	0.565	1.453	0.081	1.614				3.793		1.13			3.148	4.681	5.972	3.551			2.986	3.955	0.807	2.663		1.533	0.565	7.587	2.663	2.744			8.878	2.341	4.278	2.341	3.874		8.151	1.372	1.937	1.211	7.506
3.309	1.372	0.807	0.081	0.968				2.744		0.323			3.067	4.116	3.955	1.776			2.341	9.927	1.372	2.502		1.614	66.584	1.13	1.533	0.807			565	2.905	404	242	2.098		1.291	2.421	2.341	484	6.699
2.341	1.372	1.533	1.695	1.13				2.663		0.726			1.614	10.411	4.681	8.313			1.695	5.004	0.888	1.453		6.457	1.533	1.776	0.242	3.228			807	1.614	5.085	2.825	2.018		3.955	2.825	242	2.502	3.713
2.26	2.583	1.856	1.211	0.968				2.905		0.484			4.035	1.937	3.713	4.681			4.197	8.232	0.484	5.65		22.679	1.614	7.909	0.968	0.161			5.972	888	242	1.776	2.26		3.955	6.779	2.179	1.856	7.022
1.13	1.695	0.968	2.098	2.986				3.228		1.695			2.986	2.825	0.081	5.569			4.923	15.092	0.888	2.905		0.242	31.557	1.372	0.484	0.081			565	1.372	2.583	2.502	4.923		6.295	2.583	3.39	11.945	4.842
1.695	2.502	1.211	2.905	2.583				2.905		0.968			2.098	3.874	4.439	0.161			2.341	2.905	0.726	2.583		0.565	1.211	0.323	1.453	10.976			2.098	1.776	6.699	2.179	1.856		6.537	3.148	2.583	323	404
1.533	0.807	0.404	2.744	0.968				3.874		0.161			0.726	1.049	3.228	4.842			4.6	0.081	1.372	1.856		1.049	3.551		1.13	4.358			3.955	1.211	1.937	1.533	2.986		6.86	6.295	3.39	161	161
1.776	0.565	1.211	1.533	1.13				4.842		0.968			3.067	3.47	3.874	4.52			1.533	2.825	0.807	0.888		1.049	1.372		0.565	0.404			9.524	3.39	726	4.923	2.825		1.937	5.488	1.937	484	3.793
2.583	0.081	1.614	1.695	0.484				3.309		1.291			1.937	6.699	3.713	3.228			0.242	3.793	0.565	3.793		1.291	6.779		2.421	0.565			9.281	2.179	646	7.183	161		3.551	8.555	2.26	646	128
3.874	1.856	1.776	0.646	0.081				2.583		0.484			3.551	2.018	3.47	4.116			3.874	3.148	0.565	2.663		1.937	0.081		1.049	11.945			4.035	3.228	2.583	3.067	2.744		3.713	20.661	565	807	10.653
1.049	3.632	2.502	1.049	2.26				2.26		0.161			1.13	4.439	6.053	1.937			4.923	3.713	0.484	2.341		0.404	0.404		44.793	2.018			7.587	2.744	2.825	5.165	2.744		4.6	6.699	6.134	5.004	608
1.856	4.358	0.323	0.968	1.776				2.905		0.484			0.323	9.604	5.004	2.26			0.888	4.923	0.484	3.47		13.801	2.341		1.776	0.726			8.797	565	8.797	2.986	3.632		968	2.825	5.972	17.271	1.211
2.583	2.341	1.937	0.404	0.968				4.035		0.646			1.372	2.986	0.323	1.856			0.242	4.116	0.484	2.744		1.937	7.506		6.134	2.421			404	3.228	4.762	1.453	2.986		161	3.47	4.6	1.453	9.766
6.86	2.744	0.968	2.421	1.049				3.39		0.726			1.533	5.488	4.762	2.825			3.309	8.071	0.484	2.179		4.035	6.618		0.888	1.211			2.583	2.421	5.246	1.614	2.986		2.098	2.905	4.197	2.179	565
2.179	3.47	1.13	2.179	0.726				4.681		0.242			4.197	7.748	6.053	4.035			0.888	0.242	1.533	2.098		4.116	4.358		0.161	1.211			81	1.776	4.358	1.13	2.986		5.407	1.291	3.309	3.793	1.453
2.663	4.116	1.049	2.744	0.726				2.421		0.726			2.018	2.825	3.713	2.663			3.067	4.762	0.242	1.695		0.323	0.484		0.565	3.39			242	4.278	2.744	1.856	2.986		4.6	1.937	3.793	2.018	888
1.856	3.309	0.888	2.421	2.825				2.26		0.081			1.211	1.453	2.018	6.86			1.695	4.842		1.13		0.484	1.614		0.161	2.905			4.923	2.502	6.134	2.421	3.874		6.699	3.874	1.937	9.281	1.453
0.646	1.614	1.291	2.502	1.453				3.793		0.161			1.856	2.179	1.614	6.941			2.502	5.73		9.524		1.533	0.323		0.646	1.614			1.291	2.26	1.533	3.632	2.744		2.825	2.502	5.327	3.793	594
2.26	4.439	0.968	2.179	1.13				4.52		0.242			0.968	4.762	0.807	5.165			3.551	4.842		0.888		2.098	0.565		0.081	2.179			3.309	404	4.278	6.86	968		3.148	2.502	4.358	2.098	10.653
3.309	3.47	0.161	2.179	1.13				3.955		0.565			1.049	2.341	3.309	5.085			2.502	2.421		1.614		0.161	5.407		1.13	1.776			1.937	4.6	4.197	3.713	1.291		1.453	4.116	1.776	1.856	1.695
0.242	2.825	1.533	0.968	0.726				3.47		0.807			1.937	3.47	1.372	2.098			2.098	2.583		18.482		8.555	2.098		3.39	0.646			4.762	2.341	3.228	2.583	3.309		7.506	3.39	2.098	242	608
1.695	3.309	1.937	0.565	0.242				4.842		0.968			1.695	2.502	3.228	1.856			0.323	2.26		3.148		28.006	4.197		0.323	0.565			3.067	4.681	5.165	2.018	3.874		3.067	13.155	5.488	7.909	289
2.663	2.744	0.323	0.323	2.098				0.968		1.049			1.13	3.713	1.211	5.811			2.341	2.744		3.713		0.161	5.73		0.081	0.968			4.278	1.776	2.825	3.47	4.6		3.228	5.73	5.73	7.102	12.833
2.26	0.081	1.049	0.888	0.807				3.955		0.726			1.291	4.6	1.049	3.39			0.646	6.779		1.13		1.13	8.313		3.874	2.341			726	5.165	7.587	3.713	5.488		8.151	3.067	2.905	3.874	4.358
3.874	0.565	1.13	1.856	1.211				1.211		0.242			2.744	1.049	2.502	2.663			3.47	0.565		1.695		1.049	0.161		2.179	3.632			833	2.018	404	2.744	1.695		7.344	2.341	3.47	5.085	616
3.228	2.179	0.726	0.968	1.291				4.197		1.13			3.793	4.842	1.211	6.457			2.26	10.653		2.341		0.807	0.161		2.986	1.211			447	3.309	5.327	2.986	7.344		3.148	13.64	3.228	6.86	2.905
2.341	3.39	0.888	0.968	0.888				3.148		0.323			2.583	1.776	3.228	4.52			1.776	16.787		0.484		3.39	5.407		3.067	0.161			242	3.148	3.955	3.39	4.762		7.264	3.228	2.502	404	289
0.404	3.632	0.161	0.565	0.242				2.26		0.888			0.565	0.726	5.085	2.341			2.018	4.52		0.968		3.39	1.372		0.161	5.165			4.923	3.874	3.793	2.098	1.13		6.053	807	8.797	242	6.134
3.955	3.148	1.291	0.323	2.341				2.421		0.404			1.776	10.492	3.874	7.183			1.533	5.004		14.205		1.776	1.372		0.323	0.646			9.039	1.614	1.211	4.116	2.986		6.86	2.502	2.744	5.892	11.945
0.968	1.372	0.484	2.744	3.067				2.583		0.726			0.646	1.856	2.421	7.587			1.453	0.484		3.955		0.646	4.116		2.986	6.376			2.179	1.695	2.26	1.937	1.856		7.748	3.955	6.618	12.671	968
0.161	0.565	1.776	1.211	1.614				2.502		0.242			2.744	0.646	3.955	3.39			3.47	6.779		1.049		2.26	2.26		3.228	3.793			7.587	2.986	7.102	2.179	3.309		4.116	3.713	4.842	161	7.829
1.695	2.421	1.049	0.646	2.341				2.179		0.484			0.807	2.179	5.811	5.972			2.179	6.214		0.968		0.726	4.197		0.404	10.976			5.407	2.179	6.779	2.502	3.874		2.421	1.776	3.39	2.502	5.892
2.825	3.148	0.484	3.47	1.614				3.874		1.372			2.018	5.085	3.955	1.372			1.614	2.905		2.583		2.663	2.905		1.695	0.404			5.407	3.551	3.309	1.291	2.179		3.793	5.085	1.453	21.71	773
4.52	3.067	1.049	2.179	1.533				1.291		0.968			1.533	1.049	2.583	0.888			2.502	3.067		2.018		0.968	30.588		0.161	0.807			8.394	7.183	4.439	2.098	3.551		1.856	3.632	4.923	5.004	307
2.905	4.116	1.695	2.502	1.211				2.663		0.323			2.098	4.681	0.968	1.453			1.856	0.242		1.776		1.291	0.565		0.081	2.421			8.636	3.793	4.762	968	2.502		161	484	2.26	4.52	968
2.421	1.13	1.856	2.502	0.726				2.502		0.404			2.583	0.888	4.358	1.776			4.439	0.484		8.474		1.856	0.484		2.179	5.327			242	2.583	8.232	3.067	2.502		81	12.51	1.776	4.116	888
1.856	1.695	1.453	1.453	0.726				1.695		0.081			2.179	0.565	3.793	6.457			5.65	4.358		3.632		7.909	0.323		7.264	1.856			161	3.067	14.769	3.067	9.524		3.228	726	3.955	1.13	323
1.695	2.905	1.291	1.211	2.341				5.246		0.323			2.986	1.856	3.551	2.825			0.646	3.713		3.874		2.583	4.035		0.081	3.874			4.439	1.937	4.358	3.148	2.018		323	2.986	3.39	1.291	81
3.551	1.856	2.098	1.13	1.372				2.905		0.161			0.242	1.614	2.179	3.309			0.484	3.632		0.968		1.856	0.242		0.081	0.726			1.049	6.699	726	2.986	3.874		4.681	4.278	2.986	545	2.26
2.825	3.309	0.081	1.13	1.211				4.52		0.081			1.533	5.407	2.663	2.179			1.695	3.148		3.309		2.26	1.533		0.968	1.049			2.905	2.502	3.067	3.713	2.341		33	2.26	1.13	5.972	9.685
2.502	2.421	1.453	1.049	1.291				1.614		0.404			1.695	3.067	1.533	2.018			2.018	4.116		0.404		8.394	0.242		2.825	1.695			454	2.583	484	6.86	3.713		3.309	1.695	2.341	43	1.776
2.502	2.502	1.614	0.968	2.341				3.309		0.807			2.663	3.632	3.309	4.842			1.453	0.646		0.807		3.309	5.569		0.323	1.614			6.214	2.744	3.39	3.148	1.372		7.667	726	3.874	484	1.291
4.035	2.825	2.098	0.888	0.888				2.744		0.323			0.968	1.856	7.102	4.278			2.421	7.506		1.937		0.484	0.404		0.484	4.6			81	3.148	5.407	2.583	6.134		4.439	5.569	3.47	2.825	7.425
1.614	0.161	1.049	3.228	3.713				3.067		0.323			2.905	1.937	5.004	6.457			1.695	3.551		0.323		0.646	8.232		2.502	1.13			4.035	4.278	323	3.228	8.716		4.035	5.972	6.376	8.636	726
0.888	2.583	0.565	1.291	3.713				4.6		0.242			2.663	4.116	1.211	3.713			0.565	2.179		2.502		6.537	3.47		0.242	8.474			6.699	3.47	2.341	3.148	3.551		6.214	7.99	3.551	4.439	321
0.646	0.726	0.323	1.291	1.776				2.018		0.323			1.856	1.291	2.098	3.228			2.986	4.278		1.049		0.242	0.807		2.26	4.035			671	1.614	6.699	3.874	2.098		6.779	2.825	2.502	10.331	2.098
2.663	1.776	1.614	1.614	1.13				3.39		0.968			0.646	1.856	1.049	1.049			3.874	6.537		1.13		4.035	6.779		0.081	3.874			1.533	4.035	404	3.067	1.049		2.744	7.748	10.653	57	565
0.404	2.663	1.13	0.968	1.049				3.632		0.242			0.484	0.726	3.228	2.825			0.323	5.407		0.968		14.769	1.049		0.484	0.888			8.394	2.825	2.421	3.309	4.197		7.909	6.86	2.663	3.713	10.573
2.341	7.183	1.049	1.291	1.453				2.825		0.726			1.776	1.211	1.856	1.776			2.098	1.695		0.646		0.646	0.081		1.291	1.291			5.488	646	404	1.453	5.569		4.116	8.313	2.341	807	1.776
2.341	3.793	1.695	0.565	0.081				6.053		0.888			0.323	1.049	4.197	1.533			1.856	3.067		1.049		1.453	0.081		0.404	1.856			807	9.362	4.035	3.955	3.713		2.341	4.197	3.632	1.13	161
2.986	2.341	0.968	0.323	0.968				3.39		0.807			2.421	2.502	4.035	2.986			0.323	0.404		2.502		3.309	0.646		0.404	0.726			8.071	2.583	6.214	3.793	4.035		10.008	1.372	242	7.022	484
2.986	1.453	1.695	0.323	1.695				4.358		0.081			2.098	1.533	0.888	5.811			5.004	0.484		1.856		2.663	0.646		0.323	1.776			689	11.38	5.085	4.762	968		888	4.762	6.457	3.309	2.905
2.744	1.049	1.776	1.776	1.049				4.358		0.565			0.726	5.73	3.309	1.372			5.65	2.905		0.646		0.565	6.86		21.065	3.39			1.937	2.018	6.457	5.811	3.713		404	12.348	5.73	4.6	726
0.081	1.13	0.807	1.695	1.049				3.228		0.242			0.242	0.323	5.004	1.856			0.565	5.004		2.341		2.098	4.681		11.218	1.856			4.52	2.825	6.699	1.856	2.098		968	4.439	7.022	242	565
0.888	2.421	0.726	1.211	0.726				2.825		0.081			3.309	7.425	1.049	2.744			0.404	4.358		1.13		0.565	17.675		6.941	4.358			2.986	6.214	1.695	1.291	2.018		3.551	4.197	5.246	1.453	9.846
4.116	2.744	0.888	0.807	0.323				3.632		0.161			1.372	0.726	4.681	3.067			5.892	3.309		0.968		34.624	0.565		1.211	0.161			6.699	2.098	5.165	88	4.762		5.246	7.506	4.842	2.583	1.856
2.986	3.874	0.807	2.018	3.148				3.228		0.323			0.081	8.232	2.744	4.035			2.744	0.484		0.646		2.421	1.13		0.081	2.341			2.663	8.313	8.797	5.004	1.776		2.583	5.972	2.986	4.842	9.039
0.404	0.404	1.776	1.614	3.39				1.856		0.968			1.453	2.583	6.295	5.004			3.793	0.646		0.484		6.134	0.484		2.905	3.632			323	8.232	12.51	7.102	565		1.856	2.825	2.179	4.681	2.018
0.968	1.937	1.13	0.888	1.695				3.47		0.565			2.905	0.404	3.713	2.098			2.502	2.341		2.341		26.069	5.085		0.242	0.323			2.986	2.341	17.271	3.551	2.583		8.636	5.004	2.583	5.65	968
1.776	1.695	1.856	0.484	1.856				4.52		0.161			1.776	3.551	1.856	4.035			3.067	2.018		0.565		1.211	0.565		1.13	0.081			5.327	1.453	4.842	2.098	4.762		161	5.811	3.067	161	0.72
2.825	2.098	1.533	2.905	2.341				1.695		0.565			0.807	1.372	1.776	3.874			28.248	16.303		0.726		1.049	0.323		3.713	2.744			7.909	3.955	888	3.39	1.695		6.86	4.762	1.937	968	3.067
3.148	2.986	1.614	2.098	1.614				2.986		0.081			0.888	4.52	2.26	0.968			2.26	2.018		0.323		1.695	3.713		63.92	0.242			6.779	81	1.049	1.776	4.6		5.327	2.663	2.421	3.309	323
1.614	3.47	1.453	2.179	1.453				3.148		0.323			2.502	12.187	5.892	2.26			0.646	1.049		0.968		2.341	4.923		40.515	0.242			5.488	3.148	6.457	1.533	1.695		9.12	1.695	1.614	1.13	75
1.049	0.484	2.26	1.856	1.13				3.309		1.372			0.081	1.533	0.726	6.214			3.713	2.502		1.695		4.116	0.888		0.323	0.081			726	2.502	3.874	2.421	2.018		2.018	13.64	3.067	9.443	118
2.986	4.6	1.453	1.291	0.081				3.551		0.484			0.646	2.986	4.358	0.968			2.986	1.13		2.179		2.663	0.161		6.376	5.407			807	2.341	5.004	2.663	5.811		8.232	323	4.923	565	415
3.39	1.453	0.968	0.565	1.211				2.502		0.404			0.726	5.65	0.081	2.986			3.874	4.6		0.161		2.663	2.905		8.232	3.067			3.228	6.457	4.116	9.927	2.341		10.976	4.035	5.327	1.291	161
3.793	0.081	1.937	0.242	1.695				1.776		0.161			1.453	0.161	0.888	4.197			1.372	3.793		0.161		1.856	22.517		0.807	0.565			2.986	9.12	726	3.793	1.614		9.604	2.179	2.744	3.067	807
2.018	0.888	0.565	2.905	1.533				3.713		0.081			0.646	2.179	0.565	1.533			1.372	0.404		0.323		6.295	0.161		0.081	4.762			2.583	6.457	4.762	2.744	2.502		5.004	3.228	888	5.488	5.407
0.807	0.726	1.614	2.098	0.726				2.663		0.807			2.583	0.646	2.26	2.179			5.165	4.52		0.323		8.474	1.049		7.264	2.744			6.537	1.776	6.457	1.533	3.632		5.488	6.457	4.197	5.811	1.13
1.211	2.986	1.856	0.968	0.807				1.13		0.081			1.695	4.681	5.246	3.228			1.13	1.211		1.695		1.533	24.535		0.484	7.344			6.134	2.905	10.169	4.116	2.179		14.124	8.959	2.825	2.179	527
2.825	2.26	0.323	1.291	3.228				2.341		0.161			1.453	9.846	2.018	3.551			0.323	0.646		1.695		0.646	2.179		0.646	0.161			8.959	2.341	21.872	2.179	3.713		1.533	3.39	2.744	161	968
3.148	2.502	1.372	1.049	1.049				2.986		0.081			0.161	0.242	1.453	1.533			3.39	1.614		0.404		0.726	1.533		0.726	2.26			1.453	2.825	8.878	3.551	2.905		11.46	6.618	2.986	1.776	1.533
0.161	3.148	1.291	0.484	1.372				2.986		0.242			1.13	2.098	1.049	5.488			1.049	1.453		0.081		2.018	1.211		4.278	2.986			81	2.583	4.52	4.762	2.179		12.187	4.035	2.744	1.533	8.878
0.968	0.242	0.726	2.26	2.26				2.986		0.807			0.242	0.646	3.713	1.211			1.614	4.52		0.081		3.713	12.59		2.26	4.035			484	4.035	4.923	1.13	1.614		5.73	7.264	1.049	2.341	11.057
1.856	0.726	0.726	2.341	0.888				3.47		0.081			0.081	2.179	3.228	4.035			0.161	0.081		0.081		3.551	3.39		4.842	6.86			8.959	945	679	4.358	5.085		6.779	6.618	3.067	10.008	968
2.825	1.614	1.776	1.695	1.776				3.47		0.242			1.776	1.695	5.327	1.533			1.211	12.51				7.829	54.8		4.197	0.807			726	397	2.744	6.295	3.713		8.716	4.197	5.004	17.998	484
3.551	2.502	1.856	1.695	1.211				2.421		0.161			0.968	2.341	2.098	4.197			0.404	6.376				3.955	1.453		7.829	2.502			4.116	3.148	3.874	3.874	4.197		4.52	12.187	3.632	242	404
2.986	4.197	1.049	0.726	1.211				2.986		0.161			0.081	2.583	2.583	2.098			2.179	2.421				24.777	0.888		12.429	3.551			10.169	3.148	7.667	4.197	4.681		2.583	5.246	9.281	1.776	7.587
3.228	1.776	1.049	0.968	2.018				2.341		1.049			0.161	2.341	1.049	4.035			1.695	0.404				2.663	3.874		1.856	6.295			484	1.533	2.018	4.035	5.972		3.309	15.577	8.474	8.716	3.47
1.937	3.067	1.695	1.533	1.211				1.695		0.565			2.179	0.888	2.341	1.695			4.439	3.632				1.13	1.453		1.13	3.874			2.502	4.358	7.748	2.341	2.583		6.779	5.246	2.825	3.39	769
1.211	0.565	2.421	0.968	1.776				3.309		1.13			1.695	1.937	0.484	4.923			1.453	1.372				3.955	1.049		14.285	1.291			323	2.421	1.13	2.098	5.165		7.748	4.52	4.116	2.663	807
3.067	1.856	0.807	0.807	1.614				2.825		0.484			1.937	10.169	1.13	5.165			0.081	0.323				0.565	1.13		4.278	0.888			622	323	4.278	4.923	6.214		4.762	323	5.004	3.228	81
3.713	3.874	0.242	0.404	0.968				3.713		0.161			1.13	0.726	4.681	5.892			1.856	0.726				3.148	1.049		0.242	0.081			7.909	1.049	323	646	8.878		8.232	4.358	8.716	1.453	323
2.018	1.533	2.098	0.404	1.856				2.502		0.161			2.421	3.309	2.098	1.453			3.632	5.004				20.58	5.488		0.807	2.341			3.955	5.085	3.309	2.744	3.632		13.397	2.179	1.372	2.905	19
1.13	1.695	0.807	0.807	1.13				3.309		0.081			2.098	0.323	0.726	0.646			1.291	5.165				8.232	0.968		0.646	0.081			7.183	8.232	10.734	4.762	4.6		807	5.569	2.179	3.309	1.372
1.614	1.695	1.937	1.13	1.211				2.018		0.323			1.937	0.726	1.291	4.923			5.085	4.358				2.26	1.372		2.986	1.453			8.797	3.874	9.685	4.923	3.39		4.6	12.187	3.39	8.232	646
1.453	2.502	2.018	0.726	1.291				3.228		0.081			1.937	1.372	2.018	4.681			1.211	0.161				1.856	2.421		1.291	1.211			726	4.6	4.681	6.699	3.067		13.559	2.905	6.214	4.116	10.008
2.663	2.583	1.776	1.049	0.484				1.453					1.856	0.484	0.807	3.148			7.99	0.404				1.372	1.372		1.372	2.341			8.797	285	1.372	1.776	3.148		5.811	7.748	6.618	1.211	6.134
3.47	2.583	1.695	0.323	0.807				5.892					2.341	4.116	2.26	2.502			2.098	1.856				2.26	5.73		0.081	4.6			323	1.856	726	2.26	3.39		11.46	5.085	2.26	3.228	1.291
2.26	3.228	0.404	3.148	0.807				2.905					0.484	1.937	4.52	3.067			1.937	2.26				0.726	2.341		0.161	2.905			4.439	4.035	807	1.13	9.685		646	484	968	4.116	191
0.565	2.26	0.404	1.937	0.323				2.825					1.13	1.049	3.148	2.098			2.905	10.896				3.955	3.632		0.081	0.807			17.675	3.228	5.892	6.295	2.502		5.65	8.959	3.551	5.246	7.587
3.309	0.807	0.807	3.47	0.565				2.098					0.726	11.46	3.067	5.085			4.278	0.404				0.081	32.525		9.362	4.439			242	815	1.291	161	3.955		968	5.892	3.228	323	1.211
2.986	2.341	1.291	1.291	0.726				3.47					0.726	0.484	0.968	1.533			0.081	1.453				0.161	11.057		0.323	0.484			81	3.228	646	1.695	2.583		2.341	3.955	2.905	1.776	5.407
3.228	0.323	1.695	0.484	1.13				3.309					2.502	0.161	0.242	3.713			0.646	2.825				0.726	3.47		2.421	1.937			1.937	2.905	6.053	2.421	3.47		2.502	9.12	5.004	10.331	1.211
2.663	1.776	1.533	2.502	0.968				2.905					1.856	1.856	2.986	1.695			2.663	20.338				0.404	72.314		1.614	0.484			19.047	3.228	242	2.583	4.439		6.214	14.85	3.713	5.811	484
3.874	2.583	1.776	1.372	3.874				3.39					0.807	3.793	1.533	4.762			2.986	4.439				0.646	0.161		0.484	7.506			8.071	9.685	323	3.793	5.73		13.236	4.762	3.39	25.988	888
1.937	0.161	0.968	1.533	2.986				6.86					0.323	5.327	0.404	2.905			3.148	3.067				1.533	3.551		2.341	2.583			8.797	3.632	1.211	2.341	3.39		3.228	5.085	2.098	1.372	565
2.26	1.13	1.856	2.744	2.179				4.116					1.211	4.197	3.551	0.726			5.488	1.13				1.776	2.098		7.587	2.26			323	3.067	9.362	3.955	1.856		8.797	7.748	3.47	323	1.614
1.937	1.856	1.291	1.211	1.533				2.986					0.323	6.214	0.161	4.035			4.681	0.242				1.776	4.439		5.488	4.762			565	5.73	646	2.905	9.201		8.716	7.344	11.38	5.407	81
3.47	0.807	0.726	0.807	1.211				3.067					1.614	0.404	3.47	1.291			0.726	2.744				0.242	2.905		1.695	2.179			7.264	5.972	6.214	2.421	2.905		161	9.927	2.744	7.587	626
1.453	2.825	2.421	1.13	0.565				1.776					1.291	0.888	1.453	2.098			1.856	0.161				1.211	28.167		0.161	2.663			9.604	4.52	1.13	1.695	4.681		10.331	6.457	2.583	1.856	323
1.937	0.242	1.614	0.888	1.211				3.793					0.081	0.968	2.502	4.358			0.968	1.453				0.081	0.807		1.776	0.565			1.695	3.713	5.246	5.246	3.228		4.681	5.569	2.421	5.327	1.13
3.632	0.968	1.453	0.161	0.565				2.583					1.776	8.151	1.211	2.825			1.937	1.695				8.878	2.26		1.13	0.404			8.071	6.86	7.748	5.73	1.614		10.653	2.583	8.797	726	464
2.26	0.242	1.211	0.081	0.404				1.937					1.937	0.565	4.52	2.341			1.291	3.713				5.327	2.583		3.47	0.323			6.699	4.197	13.882	3.793	2.583		5.165	8.959	4.358	9.201	9.685
2.421	0.646	2.663	2.018	3.228				2.663					0.323	0.323	2.26	1.937			4.923	0.323				0.404	25.746		1.453	2.744			15.012	5.407	5.004	4.439	6.376		8.151	9.201	4.762	4.116	1.372
3.067	0.726	1.291	1.937	2.26				2.744					0.242	0.646	1.13	0.646			5.569	2.341				14.124	3.067		8.313	6.134			1.13	2.018	2.583	2.018	3.309		8.716	888	6.618	161	2.583
0.081	2.663	0.323	1.695	1.937				1.453					0.323	1.13	1.211	6.053			0.242	2.341				0.565	0.646		17.917	0.404			21.71	807	7.99	2.905	3.39		12.752	6.295	7.587	1.372	323
0.404	2.825	0.484	0.807	1.211				1.937					0.484	1.372	3.309	1.695			15.415	2.421				6.537	0.807		0.404	3.39			968	3.39	4.358	5.488	3.067		3.067	3.39	1.453	4.116	323
1.453	2.905	1.372	1.049	1.695				1.049					0.807	2.018	0.565	3.874			2.098	4.116				1.211	6.699		0.565	1.049			646	3.067	1.291	6.214	2.502		10.331	3.309	3.228	1.856	334
2.502	1.372	2.018	1.372	1.211				3.309					0.081	2.018	3.228	4.197			3.874	0.404				5.407	1.049		3.39	0.323			7.587	646	968	9.443	2.663		10.088	2.744	4.52	1.211	275
1.211	1.614	1.937	1.776	0.161				3.47					0.484	2.663	0.726	2.905			0.565	2.663				1.695	4.035		0.726	9.443			5.165	6.699	404	4.762	3.228		1.211	1.372	7.667	15.657	1.211
1.776	1.695	2.179	0.565	4.439				4.116					0.242	1.695	3.148	2.26			5.004	0.161				0.081	6.779		1.856	3.39			7.183	4.035	2.018	3.47	2.583		6.779	10.008	4.116	2.018	565
3.228	2.583	1.856	1.372	3.632				2.663					0.081	2.744	4.035	2.421			1.211	0.242				4.358	0.807		1.614	2.986			646	4.681	81	3.39	3.47		7.587	5.73	5.569	1.695	854
3.067	0.646	0.726	3.309	2.905				3.955					0.565	0.888	1.049	5.165			3.148	4.197				1.291	0.161		0.888	7.99			13.075	4.923	646	3.228	3.148		3.793	8.636	8.232	4.762	323
2.098	2.179	0.807	1.695	2.905				3.067					0.161	12.429	4.116	0.888			0.807	3.793				2.098	2.825		0.565	0.404			14.124	8.394	807	3.551	4.762		5.972	4.842	4.681	2.502	161
2.744	3.148	2.663	1.291	3.309				2.905					1.13	4.197	4.035	3.067			1.372	2.179				0.888	0.726		8.555	4.842			807	3.551	2.744	9.411	3.067		3.713	12.268	161	3.955	10.896
2.502	0.565	2.502	1.533	2.26				3.47					0.565	4.035	2.986	2.421			0.968	3.955				0.161	0.484		1.291	0.323			323	3.39	6.376	10.25	1.937		1.856	161	2.098	8.071	323
2.421	0.323	1.695	0.888	0.565				3.309					0.565	7.829	1.291	1.614			0.646	3.632				0.888	1.13		3.228	4.762			12.187	4.439	653	3.713	3.551		11.218	5.004	81	1.211	381
1.453	1.614	1.533	2.502	0.081				1.291					0.888	3.793	4.358	3.874			0.807	1.533				0.081	0.484		0.161	12.752			7.99	3.874	726	2.825	2.341		242	3.47	4.52	5.246	404
2.179	2.583	1.614	2.179	1.453				3.067					1.614	1.13	3.632	1.291			1.856	1.776				0.242	9.766		0.323	19.289			3.148	3.955	8.474	2.583	1.13		6.376	5.488	6.779	3.067	9.846
2.26	1.937	1.453	1.291	1.291				2.663					0.726	0.323	1.533	1.937			6.537	1.937				6.618	1.049		4.923	13.397			11.299	1.856	913	3.47	4.762		5.085	888	3.713	3.067	783
1.291	0.565	1.372	0.888	0.726				2.502					0.242	6.295	3.47	3.148			2.502	2.744				1.856	0.242		0.081	0.404			8.474	3.551	7.183	4.681	3.955		242	5.972	1.211	3.713	19
0.726	1.776	2.341	0.807	0.726				1.937					1.453	2.179	0.646	1.291			9.766	2.341				0.726	1.937		14.527	10.25			7.022	2.825	161	5.65	3.067		5.488	4.6	4.116	1.211	3.632
1.211	2.098	2.179	0.888	1.695				3.148					0.081	10.411	2.098	0.081			0.807	1.291				0.726	10.653		3.309	5.972			1.211	7.506	5.569	3.551	484		6.618	7.183	1.211	888	726
3.148	1.13	0.404	0.726	0.404				3.39					0.081	2.018	2.098	2.502			0.726	2.098				9.685	5.246		1.049	2.018			14.608	3.148	1.049	1.937	2.502		13.882	968	5.246	5.972	8.636
2.744	2.098	1.614	3.551	2.421				3.551					0.888	2.341	1.614	3.713			4.681	1.372				17.514	72.718		9.443	0.081			11.218	3.309	1.049	3.148	10.896		404	5.65	3.148	1.13	565
1.776	1.533	1.776	1.13	2.341				1.937					1.049	0.646	3.874	1.695			4.035	1.211				3.39	0.161		28.813	3.632			807	4.762	5.246	218	6.941		13.962	7.506	6.457	888	323
2.018	3.713	1.695	2.26	2.018				3.793					1.291	1.776	0.242	2.744			3.39	1.291				0.161	3.955		0.081	3.551			9.846	1.856	6.86	4.923	726		5.811	6.376	1.937	888	809
2.098	0.484	1.695	2.26	2.26				2.583					0.484	3.955	0.807	3.47			2.663	1.453				1.695	3.228		1.13	14.608			4.035	6.134	5.327	3.148	2.098		6.214	4.923	6.214	1.533	161
1.856	0.726	1.13	1.291	1.695				3.713					0.323	1.049	0.484	1.533			4.6	0.888				2.583	1.937		1.13	2.583			11.38	1.533	1.049	1.695	3.955		1.211	888	5.407	13.72	242
2.341	0.807	1.211	0.888	0.565				1.614					0.807	1.049	2.26	2.583			7.909					0.323	2.341		0.484	2.098			1.049	4.358	1.291	3.874	4.278		5.246	968	6.457	5.569	888
1.695	2.098	0.323	0.968	0.646				2.905					1.211	6.779	3.228	0.484			1.614					8.716	4.197		1.776	1.049			11.864	3.713	8.313	2.502	5.569		6.537	7.344	484	3.39	5.892
1.695	2.744	0.323	0.807	1.049				3.874					0.323	1.372	0.968	2.905			0.888					0.081	3.955		0.565	5.972			1.695	3.632	323	6.214	5.892		7.99	8.071	4.358	2.179	484
1.453	1.049	0.242	0.242	0.323				2.341					0.968	7.022	3.148	2.825			0.242					7.99	5.65		0.807	4.116			1.049	3.955	0.46	3.551	6.618		5.165	2.26	12.106	968	161
1.291	3.228	2.018	0.968	1.856				3.067					0.242	3.228	0.968	0.565			0.242					0.081	1.453		0.323	5.65			404	6.214	4.116	3.551	2.098		1.211	3.148	6.376	81	809
1.372	2.098	2.421	2.825	1.937				4.52					0.081	0.242	2.098	1.533			2.583					5.972	1.453		9.039	0.323			8.071	3.632	161	3.148	4.439		1.211	4.842	5.165	1.13	4.762
1.695	4.116	0.242	3.148	0.968				2.421					0.161	0.807	3.874	2.502			0.888					1.614	0.323		0.081	0.646			5.65	8.313	1.13	2.663	3.309		7.748	5.085	4.278	3.793	8.716
1.856	1.856	1.937	1.937	0.888				3.39					0.404	0.726	0.484	0.646			1.614					2.825	0.888		0.484	4.035			404	4.278	7.829	2.744	5.327		3.39	7.99	2.583	7.183	9.524
1.372	1.291	2.905	2.341	1.372				1.453					0.323	0.968	3.309	2.825			3.551					4.035	0.242		6.295	0.242			323	2.583	1.776	3.309	4.923		5.407	4.358	2.502	1.614	726
2.098	2.179	1.533	0.646	1.13				3.793					0.161	7.183	0.646	4.923			1.856					0.161	1.453		0.081	7.829			7.344	3.47	4.197	2.583	2.905		5.65	4.762	6.376	968	484
1.776	0.081	2.26	0.646	0.968				4.681					0.161	0.807	1.13	2.663			1.695					0.807	5.327		0.888	3.067			484	3.309	11.38	3.39	1.856		3.955	7.667	4.358	807	484
1.937	3.228	2.744	2.502	0.404				3.067					0.161	0.807	3.39	1.937			0.807					2.825	12.51		4.762	0.242			15.012	2.986	3.955	3.551	2.905		8.716	18.24	7.183	2.26	323
1.291	2.825	2.26	2.341	2.502				3.067					0.081	0.404	0.565	1.13			3.551					0.646	1.291		1.13	0.726			242	10.976	1.13	5.085	2.341		4.681	7.344	5.327	2.583	161
0.646	1.291	1.453	1.776	1.937				1.049					0.161	1.776	1.049	1.13			1.937					4.762	20.177		1.372	5.811			5.488	4.6	646	3.39	2.905		5.165	5.004	5.972	807	565
1.13	0.646	1.533	0.968	1.211				1.856					2.018	3.551	2.098	2.018			1.453					0.807	1.291		9.685	6.941			1.614	5.407	2.744	807	2.421		6.457	6.618	5.972	968	726
1.856	1.856	1.453	1.614	1.533				2.179					1.776	2.098	1.372	0.807			2.905					1.049	0.726		1.049	0.404			6.134	5.892	4.842	2.098	3.47		1.211	14.689	3.713	7.102	1.291
1.533	1.695	1.937	1.372	1.533				2.179						7.425	0.161	0.081			1.856					0.081	0.161		0.404	0.404			1.13	7.344	5.488	3.793	2.986		404	81	10.008	1.13	565
0.726	1.856	2.502	1.049	1.291				2.744						1.049	0.081	0.081			1.614					1.13	0.242		0.807	3.39			1.291	5.085	9.685	9.443	626		161	2.583	4.681	1.533	242
0.968	2.905	2.26	0.565	1.614				2.744						1.533	5.004	5.165			1.614					0.484	0.323		0.565	4.52			404	5.407	242	1.13	2.341		7.022	11.138	7.264	2.098	1.533
1.372	0.161	1.533	3.228	1.695				1.937						0.807	1.049	3.793			0.646					0.081	0.081		0.161	0.565			242	9.524	484	4.116	285		4.278	242	565	15.092	14.85
1.614	1.614	1.937	2.905	2.583				4.842						3.309	0.484	0.081			4.278					3.47	64.808		6.537	0.968			17.836	1.049	1.695	3.39	565		242	5.327	2.179	2.26	404
1.695	1.533	1.695	1.533	1.211				3.39						0.968	3.47	1.049			5.085					15.98	8.797		0.565	0.646			9.685	4.923	323	565	5.569		11.541	6.053	3.309	323	323
2.098	2.018	2.018	1.13	1.049				4.197						1.211	3.148	0.161			1.856					0.161	0.081		1.856	0.807			18.079	2.018	484	2.663	622		12.025	11.057	565	4.358	161
2.583	2.341	1.856	0.646	1.453				2.179						0.565	2.26	0.081			0.968					0.081	0.565		1.453	4.197			646	5.65	404	815	3.067		565	2.825	4.197	3.067	161
2.583	2.341	1.856	1.453	1.049				2.744						0.888	2.341	2.26			1.695					41.161	1.695		9.524	0.968			888	484	161	7.425	3.067		5.407	726	4.842	5.327	323
2.663	0.888	1.856	2.179	1.211				1.291						1.049	1.695	0.404			1.856					1.291	22.195		0.484	0.081			11.138	3.309	15.657	2.341	2.986		6.457	4.6	6.86	1.291	807
1.695	2.825	1.291	2.583	1.13				3.148						4.439	1.13	2.825			0.323					0.161	0.968		0.968	9.443			1.614	4.762	323	4.116	6.537		6.295	1.291	6.779	22.275	565
0.646	2.098	1.937	2.098	0.161				2.098						3.551	4.116	0.242			3.793					0.726	0.242		11.783	1.291			5.246	2.583	646	4.278	5.488		888	5.165	7.506	11.057	484
2.26	2.986	1.856	0.888	1.211				0.968						0.646	0.242	2.341			5.73					1.13	3.551		1.453	0.081			8.474	2.905	7.667	5.569	7.425		5.407	6.779	4.439	807	323
1.211	1.13	1.453	1.533	1.291				1.695						0.888	1.533	0.646			1.856					5.246	0.242		0.404	0.242			4.842	3.793	7.909	6.214	4.358		1.614	5.73	4.6	1.211	1.049
2.583	2.663	1.776	1.049	2.744				4.52						0.242	3.067	1.776			7.183					17.998	0.323		2.098	0.726			888	3.632	6.295	6.537	7.183		3.309	14.285	8.394	1.695	565
2.179	3.148	2.744	0.807	1.13				3.228						1.211	0.646	0.726			5.165					2.341	0.484		0.646	0.484			807	4.278	6.941	6.941	478		5.488	2.018	565	2.905	4.116
2.421	1.049	1.049	2.986	1.291				1.776						1.211	2.583	1.291			8.071					0.323	3.148		33.332	17.191			1.372	5.488	4.439	3.228	3.067		7.587	6.779	4.842	3.067	646
1.533	1.13	3.148	1.695	1.937				3.148						1.372	1.13	1.453			1.856					0.081	0.242		6.053	31.072			6.053	7.344	6.457	3.955	4.358		6.86	5.327	4.197	3.551	484
1.211	1.453	2.018	0.968	0.565				3.228							0.888	0.404			3.228					2.583	0.404		3.551	6.537			15.657	2.905	484	5.327	3.713		15.012	8.636	6.618	13.478	807
2.502	1.937	2.502	0.888	0.968				3.309							1.13	0.646			4.6					0.807	62.387		2.583	9.039			11.945	5.085	565	3.148	4.197		2.502	1.372	12.913	7.102	726
2.421	2.663	1.453	0.484	1.291				2.986							1.614	1.453			2.583					0.565	1.776		25.584	7.183			968	10.411	10.411	2.583	4.439		9.604	2.098	4.035	1.372	404
1.372	2.421	1.372	2.421	0.565				2.421							2.098	1.291			0.888					0.161	1.533		1.856	0.081			10.411	2.421	13.64	2.825	2.986		1.776	5.569	13.236	2.179	81
2.26	2.502	1.291	1.13	0.565				2.421							0.807	0.081			2.098					2.098	32.606		0.968	0.081			81	5.569	8.959	2.986	3.632		2.26	323	3.874	4.439	1.049
2.018	2.905	2.179	2.421	4.035				2.986							2.663	4.358			2.179					0.404	0.081		4.439	0.888			2.663	3.47	1.291	2.663	8.959		6.295	10.411	2.179	3.148	161
2.421	3.148	2.825	0.565	4.681				2.341							2.583	0.081			1.533					0.565	1.776		1.372	4.6			10.573	1.614	1.211	3.713	968		565	2.744	5.972	3.39	1.13
2.583	0.161	1.937	2.179	2.986				3.955							0.404	3.309			2.098					0.404	0.242		0.081	0.081			6.295	2.098	565	3.148	4.439		11.299	12.429	6.376	2.986	6.537
2.663	0.404	2.179	1.533	1.856				2.825							2.018	0.968			1.695					38.498	0.323		0.323	3.874			12.348	4.197	484	191	11.057		12.833	13.075	5.246	7.183	807
1.049	1.291	1.372	2.905	1.614				2.179							0.404	0.968			0.323					0.726	2.744		2.018	5.65			139	5.004	12.994	2.421	2.744		6.941	6.295	5.246	7.183	404
1.695	1.937	1.13	2.179	1.776				2.583							2.26	1.856			1.453					0.807	1.291		2.179	8.474			323	323	484	14.447	3.39		6.537	6.134	8.071	646	484
2.26	2.825	2.179	2.26	1.211				2.663							1.856	0.807			0.565					0.888	1.049		19.047	4.681			17.352	10.896	404	807	3.551		161	7.748	7.909	888	627
1.937	0.404	1.453	2.018	0.646				3.148							1.776	0.888			2.825					5.569	2.502		0.081	1.695			1.049	5.327	646	5.569	4.197		161	8.797	12.268	7.102	15
2.825	1.937	0.242	1.776	0.484				2.825							0.807	2.986			1.856					0.968	0.726		0.404	0.161			6.618	4.358	6.376	11.622	2.825		6.376	5.892	7.748	4.278	807
0.323	2.663	2.583	1.776	0.242				3.39							2.098	0.888			2.905					4.439	1.372		2.986	0.484			13.882	11.46	404	3.309	3.551		28.813	5.73	12.752	11.299	3.309
1.776	2.421	1.13	1.453	5.085				3.148							0.081	1.049			5.327					0.404	0.081		0.081	3.148			4.278	4.681	565	3.228	2.583		242	4.439	5.327	807	1.453
1.856	3.228	2.26	0.968	2.341				2.26							0.161	0.323			1.049					3.551	0.565		0.242	2.341			10.25	4.278	242	43	7.99		5.972	14.527	3.793	3.148	404
1.776	0.323	1.291	0.726	1.291				1.049							1.13	1.291			1.695					1.937	1.614		6.457	0.081			14.205	12.833	4.116	6.376	6.941		8.313	81	6.537	3.955	5.972
1.614	4.52	1.372	0.484	0.726				3.632							0.161	0.565			10.734					0.484	3.148		0.242	0.565			16.787	2.905	1.372	5.488	4.358		15.334	11.945	8.071	1.049	323
1.937	1.211	2.179	2.744	0.968				3.39							1.533	0.646			1.13					9.362	0.807		8.555	0.081			5.892	3.874	8.716	7.587	6.214		242	4.358	1.937	888	404
1.372	2.098	1.614	2.341	0.565				2.986							0.726	0.646			4.6					3.39	0.242		2.179	0.484			646	9.281	8.878	4.6	9.201		5.085	3.228	2.825	1.856	637
1.695	1.695	2.018	1.614	0.807				3.309							0.726	1.372			1.776					4.439	0.081		6.618	0.968			323	5.165	3.067	3.148	11.945		3.874	2.179	3.955	323	404
2.26	2.986	2.098	2.986	0.646				2.098							0.081	0.081			1.856					0.081	1.372		0.161	0.323			12.752	2.26	161	4.6	3.874		2.26	13.155	5.65	3.228	404
1.776	4.439	1.533	2.905	1.453				2.986							2.663	0.323			5.165					1.291	1.776		0.404	14.366			646	6.699	646	3.955	2.905		13.478	5.65	3.955	2.502	1.453
2.825	0.646	4.358	2.744	1.776				3.309							0.646	0.404			1.453					3.148	6.699		0.081	0.242			646	1.856	726	3.632	2.744		6.214	807	6.86	10.331	323
2.341	0.484	2.26	2.098	0.646				2.583							0.161	0.484			2.098					2.583	1.291		0.565	6.134			242	3.148	3.067	4.6	4.762		807	323	16.384	888	968
1.856	1.13	2.421	1.937	1.372				3.067							0.081	1.049			1.211					0.323	1.211		27.118	0.968			3.47	81	8.313	3.148	4.035		646	11.057	8.474	3.148	242
0.484	2.502	1.049	1.13	0.807				1.776							1.937	0.565			1.291					2.502	5.569		0.968	0.323			15	4.681	1.614	3.713	6.295		12.187	5.407	2.341	9.12	1.614
1.937	0.404	1.614	0.807	3.309				4.439							1.533	1.13			0.161					1.453	0.242		4.762	15.98			807	5.004	1.614	7.425	6.779		7.99	7.264	807	7.587	242
2.098	1.13	2.341	2.583	2.098				1.937							0.565	0.565			0.726					2.098	0.081		1.533	3.713			3.067	5.004	242	9.039	2.341		13.155	12.106	4.116	10.411	404
1.453	1.776	1.291	2.26	1.13				2.502							1.049	0.484			0.565					1.453	0.484		3.551	2.744			2.341	665	10.169	888	5.004		5.246	12.106	6.457	7.748	4.278
2.744	1.614	1.211	1.614	1.453				3.148							0.484	0.807			1.614					3.874	1.291		17.271	0.404			161	8.232	4.278	4.439	11.057		7.667	4.923	5.569	1.453	8.151
1.937	1.614	1.13	0.968	3.067				2.179							0.161	0.404			0.888					2.098	2.744		0.081	0.081			2.744	5.165	484	384	8.716		9.927	8.474	7.909	1.533	81
1.049	0.161	2.341	0.807	1.614				3.39							0.726	0.081			0.161					0.081	6.053		0.404	10.653			888	323	565	2.986	4.278		12.348	7.022	8.151	2.098	242
2.018	1.856	1.937	2.986	1.533				2.825							0.565	0.484			2.26					1.211	2.26		1.211	0.565			807	161	4.358	3.713	5.085		4.52	11.541	1.211	3.148	1.291
1.856	0.242	1.453	2.744	2.018				2.098							0.807	0.323			1.049					2.744	29.862		3.874	2.663			161	3.955	323	3.632	4.762		323	9.524	5.165	6.537	242
1.856	1.13	2.341	6.295	1.049				4.035							0.968	0.081			0.646					0.404	1.614		1.372	6.214			484	8.394	323	4.197	8.555		1.614	1.453	2.583	4.197	4.439
0.081	1.533	1.614	2.905	0.081				2.341							0.323	0.323			1.13					0.565	0.565		2.663	0.323			323	3.713	968	2.825	161		4.762	404	6.779	6.053	323
0.404	2.421	2.421	2.179	0.323				2.825							0.807				0.242					33.817	0.081		12.59	2.502			2.341	2.179	807	2.825	16.868		5.327	34.543	7.425	5.972	242
0.807	2.341	3.148	3.551	1.776				3.309							0.726				5.407					0.726	5.488		13.72	0.161			323	10.653	10.411	6.941	4.439		81	4.762	4.762	646	323
1.453	2.905	2.825	1.291	1.776				3.309							3.228				0.081					0.484	0.323		21.468	0.081			935	5.488	1.372	4.842	5.165		6.699	17.433	5.65	1.13	565
2.341	3.148	2.502	1.453	1.776				0.726							0.565				1.291					0.565	2.098		1.13	0.484			565	6.376	1.614	2.502	1.776		242	726	10.573	7.183	323
2.018	3.551	2.663	1.614	1.695				2.744							0.404				0.726					4.358	0.888		9.201	2.986			2.421	4.842	565	6.214	1.211		1.049	7.102	3.955	2.421	161
0.646	0.807	1.695	1.776	1.695				2.179							0.081				1.291					6.86	7.587		1.533	2.098			13.075	2.26	646	9.443	3.874		10.411	10.653	5.085	1.937	242
0.726	0.565	1.614	1.533	1.372				2.502							0.242				1.372					4.278	4.116		1.049	0.726			242	2.098	81	16.706	4.035		8.151	24.132	7.99	4.035	12
1.695	1.776	2.421	2.825	0.646				2.421							2.341				0.323					2.179	2.341		16.868	3.309			19.693	4.439	565	4.035	7.748		7.183	14.366	8.313	1.13	161
1.937	1.614	2.421	3.713	1.211				4.197							0.565				0.323					1.856	0.323		4.923	0.646			1.13	4.6	12.833	7.909	2.421		25.826	3.551	4.358	1.13	81
1.372	0.726	2.26	2.098	1.776				3.148							1.372				2.179					2.179	1.614		0.242	0.161			1.211	10.976	10.653	3.067	5.407		12.106	7.344	4.278	2.502	161
1.049	1.211	2.905	2.502	0.404				3.309							0.484				3.309					0.807	5.407		0.242	1.13			1.372	5.488	11.299	4.923	1.856		323	6.295	5.407	15.334	1.049
2.018	1.049	2.744	3.148	1.453				2.825							2.179				1.856					1.533	1.614		17.675	0.968			161	4.278	81	4.116	155		13.801	6.699	9.524	2.179	1.13
2.341	2.098	2.583	2.502	0.484				3.551							0.242				0.726					2.502	0.968		0.968	17.191			242	3.874	484	6.457	5.085		888	4.842	6.86	2.744	1.776
0.404	0.484	1.533	0.726	3.47				1.614							0.565				2.986					0.726	2.26		0.242	10.331			11.703	75	1.049	7.102	8.959		323	7.506	6.214	404	161
1.695	2.421	2.663	1.856	2.018				2.825							0.807				1.614					1.614	0.081		15.173	2.905			62	3.551	6.618	3.309	5.569		15.334	12.59	7.506	4.197	242
1.614	3.39	1.211	0.968	2.744				2.341							0.323				0.888					4.197	5.165		5.004	0.807			10.815	2.421	484	5.004	10.25		1.13	726	8.394	6.779	242
1.533	2.744	2.179	1.453	0.565				2.825							0.968				0.807					4.278	1.856		7.102	4.197			33	5.165	8.313	299	7.102		8.071	81	13.559	468	323
2.098	0.242	3.309	1.453	2.179				3.874							0.484				0.646					1.049	7.425		2.341	0.646			7.829	4.035	4.762	9.039	5.246		161	10.653	6.537	3.309	6.699
0.646	1.291	1.614	1.372	1.453				5.004							0.323				0.484					1.856	0.161		0.242	0.646			81	9.604	5.004	4.681	3.39		242	888	4.52	646	1.211
0.484	1.776	2.341	0.646	2.341				2.179							0.081				1.291					0.888	0.242		16.061	0.081			81	242	323	5.327	2.098		7.909	13.64	2.502	7.344	2.179
1.856	1.211	2.341	0.726	1.695				2.583							0.807				0.565					0.646	0.323		48.747	0.161			565	783	968	9.039	4.035		323	7.022	5.246	12.59	1.937
2.421	1.453	1.453	1.211	0.565				3.228							0.726				0.081					0.888	0.161		1.211	7.667			10.492	5.165	3.793	161	9.201		484	6.699	5.488	1.291	323
1.937	1.856	2.179	0.404	0.242				2.744							0.807				0.161					4.52	6.86		0.646	0.484			1.049	484	478	191	4.358		13.64	646	4.681	6.134	2.663
1.937	2.26	2.502	2.502	4.197				3.39							0.081				0.161					3.551	0.323		0.081	1.291			7.425	8.555	404	5.327	5.085		646	13.72	5.004	12.348	323
1.695	2.421	2.26	2.018	3.309				2.341							0.242				0.968					0.968	5.972		0.081	0.646			726	5.65	4.358	1.776	12.59		6.457	161	3.713	1.695	81
2.341	0.888	1.695	2.26	1.453				2.825							0.726				4.358					2.179	13.397		0.968	0.323			1.291	3.551	81	1.453	2.986		81	242	4.439	5.004	2.098
2.26	0.968	1.614	1.13	3.228				2.421							0.565				1.614					1.453	0.404		4.035	0.404			1.13	8.071	404	3.874	8.474		565	646	6.699	6.618	242
1.291	2.018	2.421	0.726	1.937				0.888											10.25					14.769	0.565		4.439	78.206			17.029	4.842	323	4.278	6.699		323	9.604	3.148	1.291	81
0.161	2.098	2.341	1.211	1.372				2.018											1.776					1.937	0.404		0.081	13.478			1.211	8.797	646	7.99	4.762		323	5.972	7.425	161	242
1.856	1.291	1.856	1.776	1.533				4.923											4.116					2.341	1.533		1.049	3.067			242	2.341	1.372	4.52	1.695		10.815	242	1.695	1.049	161
0.888	1.211	2.744	1.049	0.968				3.551											0.484					0.081	4.116		0.484	0.565			1.049	5.488	11.38	5.407	8.232		7.829	242	3.551	7.748	242
0.726	0.807	0.968	1.453	2.583				2.018											7.587					2.744	0.888		1.049	2.583			323	5.327	807	5.65	404		726	10.331	4.439	8.313	807
1.533	2.018	1.614	0.968	0.565				3.228											3.47					0.646	39.385		0.323	9.362			81	8.959	161	6.457	7.264		726	404	7.587	807	242
2.26	0.726	2.098	1.614	1.776				3.47											2.986					3.148	10.088		6.699	0.646			195	3.148	242	2.663	12.51		6.134	484	10.896	3.309	5.246
2.098	1.695	2.502	2.341	7.344				1.776											0.404					1.695	0.484		2.744	22.679			81	3.551	81	559	5.569		8.394	6.053	13.882	968	242
0.404	1.533	1.856	2.018	2.018				2.825											0.807					0.888	1.291		1.291	1.372			565	1.211	161	5.407	5.327		3.47	7.748	4.681	15.334	161
0.968	3.148	2.341	2.179	3.39				2.663											2.663					1.453	9.362		0.161	2.744			1.453	726	9.443	9.039	1.695		3.713	3.39	16.222	3.148	323
1.937	2.986	3.228	0.968	1.856				4.923											0.161					4.116	2.179		0.807	0.888			2.018	2.825	484	10.653	10.411		11.703	3.228	4.439	6.618	404
2.663	1.695	2.421	1.533	1.776				3.148											1.372					2.502	4.278		33.655	20.58			646	4.197	242	7.102	10.815		6.699	5.892	9.362	3.47	807
0.323	2.018	1.211	3.632	2.098				1.856											1.13					1.856	0.081		10.734	38.255			9.604	6.376	323	5.407	7.748		404	11.218	1.211	4.842	81
1.533	2.663	4.197	2.825	1.211				2.341											0.081					6.537	1.13		0.161	0.242			1.049	8.797	484	1.453	10.411		6.295	6.376	2.825	4.762	1.695
1.614	0.081	3.713	1.614	1.211				2.905											0.081					0.484	2.663		0.888	2.421			608	397	242	2.179	8.959		6.134	242	6.537	9.281	242
2.26	2.583	2.341	2.663	1.695				2.341											0.081					2.341	6.941		0.646	2.744			1.291	5.73	8.232	9.362	7.264		323	242	6.376	3.47	323
1.13	0.081	1.937	1.291	4.842				2.905											1.211					1.533	2.26		2.825	0.081			132	12	323	5.488	11.945		7.102	4.035	20.903	6.779	161
1.211	1.533	3.713	0.646	1.695				2.583											1.614					9.524	36.722		0.323	19.693			565	1.695	323	75	3.955		807	5.569	23.163	1.13	81
1.453	2.018	2.502	0.484	1.937				1.211											1.372					5.972	2.744		26.23	0.726			323	4.923	2.018	3.067	5.004		14.205	12.106	8.959	5.569	404
0.807	1.695	1.453	1.049	2.018				2.098											7.344					0.726	9.927		1.211	0.726			2.018	47	242	8.716	6.941		646	6.86	9.524	2.986	1.453
1.776	2.502	2.583	1.13	1.937				2.986											0.565					0.161	0.565		0.404	7.183			1.049	3.39	2.421	6.86	2.583		81	242	8.959	2.098	242
1.13	2.744	2.421	0.646	1.372				2.421											0.968					5.246	1.614		10.008	0.161			1.937	4.52	161	4.842	11.057		7.183	15.657	4.358	14.285	161
1.372	2.179	2.179	2.502	2.583				2.26											0.484					0.968	0.646		10.896	2.421			807	7.829	646	1.776	10.573		323	10.411	4.923	1.776	242
2.179	0.888	2.098	2.825	1.291				1.614											0.323					3.551	15.496		0.646	0.565			208	5.246	2.825	2.098	3.148		10.492	6.457	3.47	726	7.99
1.614	1.211	2.986	2.663	0.888				2.341											0.807					0.726	0.242		13.075	12.994			13.801	5.73	1.049	8.636	5.73		12.348	18.643	5.085	5.004	242
2.744	0.081	2.179	2.179	0.484				3.39											5.407					1.695	3.47		0.161	2.179			6.941	886	1.695	404	5.569		404	81	4.116	3.793	2.018
2.018	1.695	1.856	2.583	4.923				2.098											3.551					0.726	5.004		0.323	2.341			1.776	9.362	161	5.73	3.47		404	807	13.075	6.618	2.583
1.776	2.179	2.421	3.148	2.018				4.358											4.842					4.52	2.179		4.197	0.161			484	17.594	242	5.246	3.874		10.976	13.64	1.533	3.067	323
1.614	1.776	2.583	2.663	2.986				2.986											0.161					11.057	7.506		1.291	8.959			161	11.945	242	1.614	11.541		888	484	6.779	2.502	275
1.211	2.744	2.663	1.453	1.856				1.695											1.211					1.211	28.248		0.565	1.049			404	8.232	323	7.102	7.99		8.959	6.779	6.86	6.457	888
1.695	2.744	1.533	2.986	0.968				2.825											1.453					4.358	2.341		0.161	0.081			1.776	8.636	726	10.734	6.376		726	323	5.569	20.338	323
1.049	2.018	2.744	1.453	0.565				2.421											4.116					5.165	0.807		30.588	1.13			968	11.541	565	11.218	5.65		16.384	1.211	5.569	1.695	81
0.565	1.856	2.502	1.695	0.646				0.726											0.565					4.923	1.614		0.807	0.242			18.724	10.008	807	7.748	9.766		8.636	9.927	1.211	968	1.211
0.646	0.565	2.663	2.018	2.421				2.502											1.372					0.081	0.565		1.049	1.049			161	2.098	5.407	10.492	6.214		161	13.075	15.577	6.134	968
1.533	3.228	1.291	1.372	1.695				2.179											1.937					5.892	0.081		2.502	23.002			1.291	81	4.52	7.264	931		8.716	6.86	16.384	1.856	81
1.453	3.148	2.26	1.453	0.484				4.197											0.081					0.323	23.082		0.323	0.807			404		323	4.197	5.73		807	646	242	4.6	646
1.937	0.081	2.098	2.825	1.211				2.744											1.13					0.888	1.049		0.484	7.022			323		404	5.085	5.246		1.695	8.636	5.569	3.793	14.447
0.484	0.565	2.341	1.372	0.968				1.856											3.228					0.323	3.551		1.856	10.088			1.614		323	6.699	6.053		8.394	81	817	16.464	404
1.049	0.726	1.614	1.13	1.937				2.986											0.484					0.646	2.986		0.081	3.309			646		2.26	2.744	5.327		12.429	646	5.407	15.012	4.52
1.13	1.533	2.986	4.035	0.323				3.309											0.161					3.228	0.968		0.242	0.161			484		888	5.972	6.941		10.815	10.25	4.035	807	12.833
1.049	0.323	2.905	3.713	1.372				3.39											1.13					0.081	3.067		52.702	3.228			81		1.776	9.12	9.766		6.457	81	14.043	1.211	1.533
1.533	1.856	2.26	2.341	1.533				2.583											5.892					0.081	0.484		1.695	0.081			1.211		81	10.896	3.874		323	8.313	8.959	2.905	1.211
1.13	2.502	2.583	0.323	2.341				2.502											0.726					8.555	1.453		31.96	0.807			565		81	3.148	7.506		161	646	4.52	4.681	242
1.13	2.26	1.937	0.565	1.049				2.098											1.211					8.797	35.915		0.404	1.291			404		404	5.488	5.73		726	1.453	10.411	65	242
1.614	1.614	1.776	0.726	0.242				2.018											0.888					0.807	2.26		1.291	0.161			1.372		7.102	9.443	13.72		888	7.909	5.246	14.769	242
1.049	1.937	2.502	1.291	1.13				3.148											1.533					4.681	3.067		0.161	3.713			968		913	3.632	4.035		323	7.909	7.506	968	161
2.098	0.646	2.018	0.968	1.937				2.341											1.211					4.6	2.098		0.807	12.59			646		81	3.874	3.39		565	10.331	9.362	1.291	1.13
2.098	0.081	2.421	2.341	2.502				2.26											0.081					13.882	1.695		0.081	0.807			2.583		565	106	7.022		323	5.811	5.569	1.049	161
0.726	2.018	1.937	3.067	1.291				2.179											1.776					2.825	2.421		0.161	0.242			19.128		323	8.071	4.842		968	565	6.053	6.214	7.99
0.404	0.404	2.179	2.905	1.856				1.533											4.358					4.358	3.793		19.208	1.453			646		323	752	81		5.811	646	4.762	18.159	565
1.372	0.484	4.923	2.663	1.291				1.372											4.6					3.067	0.888		0.323	1.211			646		565	6.86	6.376		8.232	323	5.004	8.959	323
1.614	2.26	2.018	1.533	1.211				3.551											1.372					1.776	1.695		1.695	6.779			161		161	5.73	8.151		484	161	565	13.64	323
1.856	1.776	1.937	1.776	5.085				1.695											0.161					0.807	4.6		1.776	6.86			12.752		484	9.846	6.134		7.022	484	7.829	11.46	1.13
1.695	3.067	2.179	1.614	2.421				2.098											0.161					0.565	0.161		4.842	0.161			1.695		6.618	6.295	9.685		484	5.65	81	4.116	1.937
1.776	1.211	2.825	0.484	2.018				1.291											0.888					0.565	1.453		4.681	0.968			242		161	173	6.053		17.029	81	11.299	9.039	1.776
1.453	0.726	2.663	3.551	1.13				2.018											3.551					0.404	1.291		6.457	6.053			242		5.972	5.811	9.766		23.163	404	565	1.049	484
0.404	0.404	2.018	1.533	1.453				3.309											0.161					8.232	0.323		0.323	16.303			1.695		565	5.246	81		11.622	726	14.124	323	888
0.888	1.937	2.583	0.565	1.614				1.211											0.161					4.52	2.905		9.846	0.726			242		484	5.488	6.941		807	6.779	8.474	888	404
1.776	2.26	3.148	3.067	0.726				0.404											0.726					5.569	1.291		0.161	7.587			1.211		323	7.022	3.713		323	5.246	6.941	2.018	81
1.533	0.323	2.744	3.309	0.888				1.211											7.99					3.39	0.242		0.484	0.161			968		888	3.874	6.537		7.022	13.075	6.295	7.829	1.856
1.372	1.372	2.018	2.421	3.955				1.049											2.26					0.081	0.404		0.807	0.888			161		565	7.829	11.703		646	12.833	5.892	4.923	2.825
0.807	0.484	1.291	2.018	3.874				2.421											0.484					4.923	46.165		0.565	0.968			14.85		8.232	5.811	5.73		11.46	323	4.197	807	242
1.049	2.179	1.533	0.807	2.744				0.968											4.116					0.161	0.807		17.352	0.565			1.211		9.604	5.65	7.102		9.443	22.195	726	888	242
0.888	1.937	3.309	3.47	1.453				2.018											2.018					0.565	4.035		1.13	0.081			14.769		6.214	14.285	9.362		404	646	5.246	3.067	484
1.13	1.614	3.47	3.067	3.228				3.955											1.13					0.161	0.161		0.161	1.291			12.913		404	10.169	2.825			9.362	8.959	9.846	242
1.211	2.018	2.986	1.211	2.018				2.744											2.825					2.744	83.694		5.085	0.888			1.13		646	4.035	9.766			10.976	5.569	3.47	323
1.614	5.246	2.583	2.179	2.986				1.614											1.614					1.211	3.793		0.161	0.323			15.092		404	3.47	8.636			565	5.65	11.138	484
1.695	0.081	1.372	1.13	1.372				1.937											3.632					6.295	3.39		0.646	1.776			484		13.64	7.102	10.25			323	2.26	726	726
1.614	0.081	2.905	2.502	1.13				2.018											6.86					4.439	1.291		0.081	0.484			1.13		331	4.923	8.959			161	2.098	1.776	242
1.695	0.726	2.663	3.713	0.726				1.372											0.323					1.695	0.565		2.26	1.049			726		242	81	976			404	4.762	3.793	1.291
2.583	1.937	2.905	3.955	2.986				2.825											1.211					5.488	4.52		0.081	2.502			646		2.341	6.618	4.197			646	5.327	7.667	807
1.453	2.179	2.663	3.067	2.583				0.807											5.569					2.744	0.161		0.323	0.323			594		1.372	8.313	3.713			11.299	242	3.955	888
0.404	0.242	2.744	2.421	1.937				2.421											3.067					1.695	52.137		0.888	9.201			323		404	6.214	484			15.254	6.214	4.278	1.049
0.726	1.856	1.776	1.856	1.695				2.502											0.807					0.968	0.646		0.081	2.905			1.13		1.695	6.053	1.937			4.278	10.976	6.86	1.291
1.372	1.776	2.744	1.453	1.372				1.049											0.404					2.26	0.404		0.323	0.404			161		565	169	888			323	6.295	726	2.341
1.937	1.533	2.825	0.242	3.47				1.13											3.632					8.716	5.407		0.807	1.695			285		7.022	8.071	8.797				6.295	888	468
1.291	1.211	2.421	3.309	1.695				1.372											1.453					0.323	11.864		0.484	4.035			1.372		1.856	242	646				3.228	242	323
1.856	1.937	3.228	3.874	2.018				2.583											1.049					0.484	0.323		0.726	0.081			161		161	6.86	3.39				10.734	1.291	323
0.565	3.067	2.744	0.565	1.614				1.291											0.807					1.856	0.807		0.565	1.533			81		81	3.713	646				8.071	646	565
1.13	0.565	3.228	1.533	2.341				1.695											1.695					0.081	2.502		1.533	0.968			1.13		323	6.779	646				14.285	3.793	714
0.323	0.081	1.695	2.341	2.26				1.453											4.923					2.744	12.187		0.404	19.693			726		0.75	5.811	4.439				45	1.533	1.13
0.161	0.565	3.632	0.726	4.762				1.776											3.632					0.323	0.888		0.807	7.748			805		299	7.264	6.457				2.744	5.407	565
0.807	1.937	2.905	3.632	3.955				4.278											3.228					1.049	1.856		2.502	0.968			81		161	9.362	6.295				14.689	7.506	1.211
1.291	1.695	1.533	1.13	1.937				3.228											1.13					1.695	12.51		3.228	6.537			81		404	2.986	3.228				5.811	807	968
1.695	3.148	3.228	3.713	1.776				1.453											1.049					6.618	2.421		0.161	1.13			323		726	9.927	646				82	646	565
2.018	0.565	4.358	3.713	1.372				0.807											0.807					2.179	5.246		0.161	3.632			161		81	10.25	807				173	5.65	726
0.968	1.049	2.502	1.776	1.937				1.614											1.695					1.937	2.421		1.049	1.856			565		1.13	9.12	807				807	11.057	726
2.26	0.161	5.73	3.309	1.453				1.856											0.565					0.161	0.968		0.081	1.453			646		161	11.46	4.842				9.846	1.776	807
1.049	1.291	3.228	2.825	1.049				1.211											7.102					6.214	3.067		0.323	0.081			646		807	299	5.972				3.874	3.309	161
0.484	1.856	2.502	1.211	1.372				1.049											2.583					0.726	1.453		0.484	0.161			216		323	4.278	646				242	3.793	2.341
1.13	2.502	1.614	0.646	3.39				3.632											0.565					2.986	3.632		0.888	0.726			1.776		81	888	1.291				447	1.211	484
1.856	0.323	2.825	1.937	1.856				3.39											1.372					3.793	2.502		0.484	0.888			81		81	4.035	726				13.559	8.071
1.453	0.323	2.905	1.372	1.372				2.179											6.618					3.309	1.695		0.242	0.726			12.106		404	2.179	1.453				10.25	11.138
0.565	0.646	1.776	4.439	3.874				2.744											4.035					0.484	0.081		10.25	7.344			195		242	9.201	2.26				8.394	726
1.211	1.533	3.39	2.098	2.421				1.533											0.161					3.148	8.636		0.323	11.057			1.049		161	888	807				79	484
0.807	1.856	1.776	4.035	1.614				1.372											9.281					0.484	10.815		0.888	0.242			242		769	8.959	2.744				689	7.183
1.13	1.614	3.39	2.179	1.937				0.404											2.583					4.116	2.986		1.049	0.242			81		646	9.362	5.004				3.148	1.211
1.291	1.856	2.502	4.116	0.888				0.968											5.892					1.776	5.569		12.833	0.968			404		565	726	3.47				10.25	1.291
1.372	1.776	2.502	5.246	1.211				1.372											1.13					3.309	0.081		0.161	0.081			6.86		323	3.309	3.39				12.268	4.6
1.937	1.614	2.583	1.372	0.888				3.148											1.695					3.874	51.814		1.291	0.807			484		484	726	0.46				9.604	2.502
1.614	3.713	1.695	1.614	1.453				2.905											2.583					2.018	12.025		0.646	0.323			323		484	807	3.067				7.909	2.663
0.081	2.421	1.776	1.695	2.098				0.726											3.067					1.937	1.372		2.583	1.291			2.986		565	4.6	2.986				689	8.878
0.888	1.695	2.098	1.614	1.372				0.807											4.358					1.695	0.807		0.242	0.646			484		323	726	242				10.976	1.776
1.695	0.081	5.892	3.067	1.856				1.13											7.99					0.968	4.6		12.671	0.161			484		81	6.779	3.228				8.878	807
0.888	0.484	2.825	1.937	2.905				1.695											0.807					6.779	3.148		0.161	4.923			15.98		323	3.47	807				7.102	9.604
0.888	1.049	1.937	1.937	2.502				1.291											1.13					5.085	5.488		0.404	0.242			81		622	807	242				242	2.098
1.533	1.453	3.713	2.341	2.018				3.713											0.646					1.695	0.726		20.338	0.081			807		1.453	4.923	3.309				7.344	9.281
1.211	0.404	1.937	2.341	1.695				2.986											0.404					12.429	2.018		11.299	1.211			10.653		404	968	646				949	3.39
1.291	0.888	1.614	1.856	0.968				3.309											1.776					1.776	2.663		0.968	0.807			484		268	6.214	3.551				6.618	6.295
0.565	1.453	2.098	1.937	1.372				2.26											2.098					16.142	0.081		0.807	0.807			968		323	968	968				8.071	4.842
1.372	1.856	2.018	1.291	4.6				3.955											1.614					2.986	0.161		0.968	1.533			81		242	968	4.6				11.299	7.022
1.372	0.484	2.341	3.39	2.018				2.341											1.372					3.874	4.842		0.161	1.291			1.614		496	1.614	1.211				404	464
1.453	0.646	2.26	1.937	2.421				1.533											5.488					10.411	1.13		4.52	0.484			81		142	807	646				5.004	7.022
0.726	0.081	2.663	2.179	2.26				3.067											0.888					7.748	1.937		0.242	1.291			1.291		565	3.067	3.39				9.12	968
1.211	1.372	2.583	1.695	1.13				2.825											1.211					0.081	1.695		3.228	0.646			9.685		81	5.085	1.695				6.699	646
1.291	1.533	3.713	0.968	1.372				2.986											0.404					0.807	1.13		6.941	0.161			81		161	2.179	1.291				7.102	646
1.211	1.372	1.614	3.39	0.646				1.291											0.807					0.565	2.825		0.242	0.081			807		161	3.39	1.695				7.748	2.421
0.081	1.937	2.502	2.502	0.646				3.47											0.968					3.39	0.726		15.334	1.291			404		404	3.39	1.211				3.874	2.018
1.453	2.098	2.098	4.116	0.081				1.856											1.13					8.313	0.323		0.323	0.646			726		484	3.067	3.228				968	5.65
1.372	1.211	2.421	3.39	2.018				2.905											4.197					5.085	0.888		0.161	0.565			404		323	404	1.291				11.46	11.38
0.081	0.807	2.905	2.26	2.583				2.905											0.484					6.053	1.372		0.081	1.453			807		6.941	6.295	565				7.022	565
0.888	1.533	2.502	4.762	1.211				0.888											2.179					0.242	1.856		1.049	0.484			404		565	3.632	4.116				2.018	2.986
2.098	0.081	2.502	1.776	2.26				0.888											1.291					0.081	0.081		1.533	2.986			161		242	888	3.793				9.685	2.098
1.695	0.726	4.923	3.551	1.211				2.179											1.291					4.681	2.421		14.285	1.372			81		242	242	2.421				323	258
0.565	0.081	3.148	0.404	2.583				3.632											0.888					0.323	4.762		0.242	0.161			1.695		5.811	404	2.502				11.783	8.071
0.565	0.161	3.148	2.179	1.372				4.358											1.291					1.211	0.242		0.323	3.309			1.776		807	726	3.148				3.47	4.197
1.211	0.404	2.583	4.116	2.098				2.26											3.309					0.323	20.823		0.242	0.242			323		81	3.874	4.116				4.278	8.716
0.888	1.049	3.39	0.565	1.695				0.807											2.098					35.673	0.484		1.776	1.049			3.309		161	1.13	2.905				6.86	726
1.695	1.695	2.583	2.986	3.632				0.968											0.161					6.295	1.13		0.484	1.211			161		242	3.551	7.102				8.716	1.13
1.695	2.098	3.47	0.807	2.825				1.453											3.228					2.098	1.695		0.646	1.13			161		6.618	4.842	3.148				726	3.713
1.372	3.793	2.26	1.937	0.807				1.211											5.407					6.134	1.533		2.098	4.197			6.699		161	1.453	807				1.372	1.049
1.13	0.323	1.211	0.404	2.018				0.726											1.291					6.295	1.776		3.47	0.484			161		2.583	807	2.663				1.211	4.116
1.049	0.242	2.26	2.744	1.13				2.421											4.52					5.165	1.695		5.327	0.323			81		242	3.228	2.26				458	984
1.211	1.291	3.713	2.421	0.484				2.098											0.888					3.228	2.744		2.341	0.565			323		565	1.776	1.13				1.614	12.429
1.13	0.484	3.47	0.404	4.358				2.341											1.049					1.695	1.049		11.945	1.372			949		404	1.453	968				646	8.232
0.242	1.776	2.744	3.228	1.049				1.614											2.26					0.726	1.453		0.081	0.323			242		242	1.776	968				6.941	12.59
0.968	2.098	2.663	6.779	2.098				1.856											3.309					2.663	38.74		0.565	0.081			81		8.636	1.372	2.825				1.13	6.618
0.968	0.323	3.067	2.421	1.856				1.13											1.049					1.372	0.323		7.506	1.13			1.776		323	3.228	1.453				807	8.716
1.372	0.726	4.278	3.47	2.098				1.533											0.807					0.161	3.793		0.081	0.807			726		161	1.291	565				3.793	8.151
0.807	0.565	3.632	2.341	1.856				3.632											0.565					1.291	4.278		0.807	1.695			161		81	726	484				968	11.46
1.372	0.726	1.776	4.842	1.533				1.937											0.323					5.004	6.941		2.341	1.049			14.85		161	2.583	1.291				5.73	5.246
1.533	0.565	1.614	2.905	2.341				2.341											4.197					3.067	0.242		0.726	3.067			161		323	4.278	888				1.533	8.555
1.211	1.453	3.067	2.26	1.695				1.614											1.13					0.807	0.807		8.313	1.13			968		323	2.663	7.344				7.748	366
1.533	1.695	3.148	2.179	2.905				1.533											2.905					4.681	0.404		0.726	4.842			242		2.26	3.067	2.744				1.695	2.825
1.695	2.341	3.47	1.937	2.341				0.968											4.439					4.116	9.039		9.362	1.614			726		815	4.439	2.663				404	81
1.291	1.695	2.744	2.098	1.291				1.291											1.533					6.86	68.924		2.502	0.404			404		81	3.874	807				81	1.614
1.695	2.179	2.341	2.018	2.018				1.856											0.565					1.856	0.726		1.614	0.646			404		81	2.986	807				2.018	5.65
2.341	0.081	2.583	3.713	1.533				4.439											0.404					34.301	2.018		5.65	0.161			646		7.344	3.47	2.018				47	1.13
1.13	0.726	4.035	2.098	2.098				0.726											0.161					1.776	2.502		5.569	0.323			81		2.098	3.713	5.569				1.533	5.246
0.968	1.533	2.905	1.937	1.049				2.905											1.049					2.986	7.99		3.067	0.081			242		81	1.533	1.695				646	1.211
0.726	1.695	3.309	5.085	2.744				0.726											1.695					1.372	10.653		7.425	1.453			338		323	6.941	3.713				404	3.067
0.646	2.26	2.905	1.856	0.726				1.211											0.565					1.211	5.407		3.47	1.211			161		242	2.341	646				1.453	594
1.211	1.937	2.341	1.937	2.018				0.565											5.246					0.161	2.744		5.327	0.404			10.008		565	622	7.183				484	285
1.695	0.323	5.327	2.018	1.776				0.565											5.327					4.762	0.161		2.502	0.081			646		81	1.13	646				404	484
0.404	1.776	5.327	4.6	2.663				3.148											1.776					2.825	0.323		0.081	0.646			1.291		161	1.049	726				323	4.197
1.13	0.807	2.26	2.986	1.049				1.937											0.404					0.565	7.022		5.165	0.081			565		242	2.663	1.614				6.214	5.407
0.807	1.937	2.421	2.098	3.067				0.888											1.776					2.179	7.344		0.242	3.067			242		2.26	1.049	1.372				807	2.583
1.211	3.632	3.551	1.291	2.098				0.888											2.018					4.035	34.704		16.384	0.968			323		968	2.905	1.776				646	242
0.726	0.646	3.39	1.856	1.049				0.404											4.681					6.295	3.632		0.081	8.394			161		81	1.776	646				1.614	15.657
0.242	1.372	2.018	1.937	1.211				2.26											0.404					1.453	7.022		1.291	0.565			1.13		404	646	646				8.797	14.85
1.614	1.533	2.098	6.214	2.26				0.968											0.968					3.39	8.071		15.415	0.081			3.148		1.13	1.533	565				242	5.327
0.081	2.179	3.874	3.228	1.291				1.049											13.72					7.587	0.807		3.148	0.161			968		242	968	2.744				3.067	4.197
0.484	1.372	1.856	1.211	2.421				3.067											4.358					14.608	1.776		0.081	8.555			726		323	2.744	726				646	3.148
1.372	2.018	2.986	4.842	2.744				1.614											1.533					7.667	0.242		2.179	14.527			161		81	2.663	1.211				4.197	4.197
1.614	0.081	3.148	1.453	1.291				3.067											0.726					0.726	9.927		18.079	0.323			242		323	888	807				7.183	12.833
1.13	0.081	3.39	5.165	3.228				0.888											3.228					1.13	2.341		1.372	0.968			484		1.372	1.533	1.049				242	9.201
0.242	0.161	2.26	3.874	3.309				2.986											3.955					4.035	2.825		0.888	17.11			81		6.053	2.098	1.614				161	565
1.291	0.161	2.421	2.502	1.776				0.726											0.888					2.26	0.565		0.161	1.533			423		5.004	5.488	565				484	1.533
1.13	0.888	2.502	1.856	2.986				1.13											13.236					4.197	2.421		4.52	0.565			565		81	1.856	4.197				323	2.26
1.049	1.453	2.26	5.085	0.484				2.502											0.646					0.807	1.614		1.614	0.968			404		161	3.632	2.018				16.868	22.84
0.968	0.565	1.856	2.905	0.404				0.888											2.421					2.744	4.197		0.807	5.407			242		565	646	726				10.088	14.608
0.484	0.565	1.937	1.695	3.713				1.453											0.081					7.829	8.797		1.049	0.484			484		161	7.344	404				565	4.358
0.807	1.856	2.905	1.856	1.372				0.646											0.404					1.695	0.726		0.565	0.081			81		161	1.049	5.085				3.793	3.067
0.968	0.484	2.26	4.439	1.776				0.807											4.842					16.303	6.699		2.986	0.646			15.334		484	7.667	484				646	2.744
0.484	0.081	1.776	2.663	1.291				2.825											2.421					6.134	0.565		0.161	0.242			7.264		565	1.614	565				1.453	1.695
0.726	0.646	2.663	1.856	1.453				2.905											0.968					0.726	0.404		0.646	2.018			242		404	807	726				1.291	4.52
1.13	0.807	2.341	2.179	2.26				1.13											0.726					1.856	1.049		10.411	1.937			323		161	1.372	1.453				7.425	7.102
1.13	0.726	1.695	1.049	1.695				0.968											0.242					4.116	8.474		0.565	2.905			565		242	1.695	4.116				2.825	1.372
0.323	0.807	4.52	2.502	2.663				1.049											0.565					1.291	2.26		2.018	0.646			646		888	888	4.439				726	1.291
0.968	0.404	6.053	2.663	2.179				1.453											0.404					1.614	0.081		50.927	2.018			81		323	646	726				1.856	3.148
0.161	1.614	2.502	1.856	2.341				0.484											2.583					0.242	6.537		0.726	0.807			1.372		1.856	2.744	646				4.197	242
0.565	0.323	4.762	1.695	1.856				0.161											1.211					1.533	0.646		0.888	0.726			1.856		565	726	888				323	11.541
1.13	1.291	3.148	1.695	1.937				1.533											5.569					1.533	0.565		0.726	0.888			242		81	1.291	4.6				5.246	1.291
1.13	0.404	3.793	0.161	2.018				0.968											1.776					1.13	5.892		5.569	0.484			242		1.533	888	1.856				769	1.13
0.404	0.968	1.695	4.842	1.695				2.905											2.098					3.47	1.211		1.776	2.986			1.937		161	1.211	968				2.825	1.291
1.372	1.211	2.26	4.923	1.614				1.372											1.13					1.533	0.807		6.214	2.26			242		81	1.776	1.937				161	6.699
0.081	0.242	1.453	1.776	3.309				0.565											0.646					4.035	5.407		1.533	0.565			242		81	726	161				4.035	3.228
0.565	0.646	2.421	3.228	2.018				0.807											0.161					5.811	5.004		2.744	2.098			888		1.372	4.358	807				404	6.134
0.242	1.372	0.807	3.228	1.372				1.13											0.161					2.421	1.856		1.291	0.484			726		807	2.018	4.197				565	10.169
1.13	0.404	3.47	2.905	2.098				0.726											0.404					0.242	5.65		0.081	0.081			634		242	726	565				478	10.25
0.888	0.888	2.179	1.614	1.695				3.632											1.533					1.695	2.744		0.323	1.856			404		484	484	2.341				1.291	1.614
0.888	2.341	1.937	1.049	1.372				2.018											4.278					4.681	0.968		11.299	3.47			565		81	5.165	1.291				323	1.291
1.049	2.341	0.807	3.793	2.421				2.098											1.614					4.358	9.12		0.323	1.13			173		161	565	1.211				5.085	1.049
0.888	2.018	3.713	3.39	3.713				1.049											0.565					2.905	5.165		1.533	0.726			8.313		81	565	1.533				3.955	3.39
0.968	1.372	5.569	2.583	0.726				0.646											1.372					0.646	1.13		0.242	1.049			726		161	726	1.776				4.842	1.453
1.776	2.663	2.421	3.39	2.018				0.404											0.242					45.519	0.646		6.214	4.035			81		81	1.695	1.453				4.197	169
0.081	2.421	1.856	2.905	1.614				0.726											4.842					17.594	0.404		0.242	0.161			3.713		242	3.955	565				3.551	1.372
1.13	1.937	2.663	4.6	2.018				0.726											2.663					3.551	7.183		0.646	1.13			935		4.52	4.439	2.098				5.407	5.165
1.291	0.161	3.955	3.39	3.228				0.484											6.779					0.081	0.161		0.726	0.323			323		404	807	1.372				3.39	1.372
0.242	2.986	4.116	2.744	1.211				0.888											0.404					1.049	28.328		0.726	6.053			484		161	726	323				622	1.372
0.161	0.484	3.874	3.39	2.341				1.372											0.565					1.695	1.049		1.291	0.242			1.211		242	968	3.309				81	4.116
0.646	0.484	4.439	1.776	2.663				1.614											4.278					0.888	3.793		3.793	0.161			323		565	4.439	1.291				3.632	1.937
1.049	1.291	2.098	4.762	2.905				1.211											2.341					1.695	3.793		0.888	0.807			242		404	1.856	1.453				6.537	1.291
0.404	1.776	3.39	3.228	2.341				2.986											5.165					0.161	0.404		0.807	0.081			242		815	323	1.372				3.955	1.13
0.404	1.856	5.892	3.39	2.986				3.067											2.26					0.968	5.569		6.618	13.397			161		404	2.018	1.291				4.197	1.049
1.13	0.484	5.569	4.116	2.502				2.341											2.663					1.372	0.888		23.567	0.565			726		1.049	726	1.291				323	1.372
1.049	0.242	5.569	2.663	4.197				2.502											0.565					0.726	0.565		2.098	0.404			484		81	968	2.018				646	1.13
0.968	0.807	3.39	3.793	2.583				0.242											4.681					1.614	2.341		0.646	7.022			968		8.716	4.358	1.453				8.555	1.211
0.726	0.807	5.488	5.407	2.905				0.968											1.695					1.211	4.278		2.663	0.484			3.067		1.13	726	323				1.695	1.695
0.242	0.807	4.278	2.663	2.098				0.323											2.583					3.067	0.807		0.081	50.039			565		323	2.341	81				1.776	6.779
1.049	0.888	6.537	2.744	2.502				0.484											0.565					1.211	0.404		0.968	6.537			404		484	1.533	1.372				2.825	1.049
0.726	0.565	2.986	2.986	2.583				2.744											3.713					8.474	0.404		2.583	1.211			81		161	1.211	484				323	1.937
0.323	0.081	3.874	3.309	2.179				1.695											3.551					2.986	1.049		2.825	0.161			81		323	1.614	1.453				968	3.632
0.323	0.646	4.197	2.825	2.825				0.323											0.807					2.744	0.404		12.348	0.807			1.13		242	1.776	1.291				2.098	888
0.161	0.565	2.825	3.309	0.968				0.565											0.484					8.151	0.161		2.341	0.242			565		81	1.533	161				3.47	888
1.13	1.211	4.439	2.583	1.533				1.533											0.323					0.807	0.565		0.888	1.695			2.018		1.049	2.098	404				1.372	2.502
0.484	0.968	4.923	2.26	2.744				0.242											4.116					1.776	4.197		5.892	1.049			81		323	1.453	323				404	3.551
1.13	0.807	3.713	2.905	2.663				3.309											4.278					5.246	1.776		0.484	0.726			81		323	646	8.959				323	968
0.323	1.533	4.923	2.421	2.986				0.161											4.197					2.421	1.533		2.421	0.323			81		1.13	323	888				2.986	888
1.291	1.856	5.004	2.583	2.26				0.807											1.856					1.211	2.744		12.59	0.081			888		81	3.228	7.506				3.955	807
1.13	1.372	2.905	3.47	1.211				0.565											2.26					1.291	0.968		1.211	0.323			1.211		2.018	1.372	807				1.13	1.13
0.565	0.565	4.52	2.421	1.614				0.646											0.081					1.453	6.376		6.699	1.049			484		888	1.372	9.362				404	2.583
0.161	1.049	4.116	2.905	0.646				2.583											2.421					0.161	3.632		0.888	53.671			565		81	1.372	968				8.555	1.13
0.484	2.341	3.793	2.905	0.726				1.776											1.533					1.049	2.825		2.018	0.323			323		2.018	2.179	1.13				726	1.533
0.484	2.421	3.39	1.372	3.551				1.13											6.295					0.081	18.482		4.278	0.484			679		323	1.211	1.291				2.502	323
0.968	0.323	4.842	2.905	2.179				1.049											1.372					1.776	1.533		7.748	0.646			323		404	404	323				1.211	888
0.888	0.081	2.421	4.842	2.744				3.874											1.937					2.502	0.968		7.344	0.968			384		161	1.533	807				1.291	1.049
0.807	1.211	5.569	2.341	1.372				1.13											3.228					5.65	1.049		1.13	0.081			81		81	1.372	1.13				7.99	13.236
0.323	1.13	1.533	3.39	1.372				1.776											2.098					1.13	2.26		6.295	51.814			161		242	242	323				2.341	726
0.565	1.614	3.309	3.955	2.341				1.372											3.39					1.372	2.502		1.937	0.565			81		161	1.291	6.86				161	4.197
0.081	0.323	2.905	1.695	1.211				1.211											0.161					2.502	2.421		3.632	17.029			81		161	404	323				3.39	2.744
1.13	1.937	3.228	3.793	1.856				0.565											0.081					3.148	8.232		2.179	0.888			807		81	1.533	323				1.937	565
0.161	0.646	4.116	4.197	3.228				0.726											2.098					2.583	0.807		2.26	0.565			484		968	1.291	5.892				807	968
1.049	2.26	2.583	2.825	1.453				1.937											0.807					0.323	9.846		1.453	1.211			726		81	242	5.569				968	646
1.049	0.726	4.035	3.067	2.098				1.856											6.134					12.59	0.888		1.776	2.986			81		242	323	807				565	6.457
0.484	1.049	3.551	5.085	1.372				0.807											2.421					4.762	0.161		1.937	0.161			161		888	404	1.049				1.211	4.278
1.049	1.211	4.197	3.955	2.825				1.533											0.081					9.12	3.793		6.699	0.323			1.937		646	9.12					8.474	323
0.323	0.161	4.842	3.874	2.098				1.614											3.793					1.211	2.098		26.069	0.161			646		81	888					13.155	565
0.081	1.856	3.228	2.744	2.26				2.663											0.726					0.646	1.695		0.081	0.161			484		81	7.506					7.748	12.268
0.323	1.049	1.13	4.035	2.341				0.646											3.067					1.049	5.004		1.856	0.888			7.264		81	888					2.663	2.098
0.081	0.565	2.583	6.295	2.825				0.726											0.323					6.779	7.425		2.421	0.807			1.049		807	9.604					807	2.663
0.807	0.726	3.067	4.681	3.228				0.968											11.864					0.323	6.134		1.211	0.726			565		81	888					2.421	1.372
0.565	2.179	2.179	3.067	0.968				0.242											4.681					3.874	1.614		2.421	2.098			1.533		484	1.291					5.246	565
0.081	0.484		4.681	3.551				1.695											0.323					14.447	25.988		0.081	1.291			81		726	1.291					1.13	3.148
0.242	0.807		2.502	5.892				0.161											0.161					1.049	3.713		0.888	12.833			1.533		323	242					323	3.793
1.13	1.13		1.13	2.421				1.856											0.807					4.923	4.681		3.632	0.081			2.421		81	888					726	2.018
0.161	0.646		2.421	2.583				1.291											0.161					0.484	1.856		2.341	0.323			7.667		404	968					1.372	2.26
0.161	0.484		2.663	2.825				1.695											0.081					0.404	1.533		5.569	0.646			807		242	323					323	2.744
0.323	1.372		1.211	2.421				0.161											5.004					0.242	3.067		3.874	1.211			565		1.13	6.941					4.6	404
0.646	0.484		2.744	1.776				1.291											3.067					1.533	3.632		3.955	0.242			81		646	323					5.488	2.018
0.484	0.646		2.825	1.776				1.372											2.663					3.228	0.646		0.081	0.323			404		81	404					1.049	484
0.888	0.161		2.825	3.713				1.776											5.085					3.551	4.923		0.888	2.26			81		8.555	5.972					404	2.098
1.211	0.323		3.067	3.228				0.807											2.663					3.148	8.394		0.161	0.081			1.695		404	5.569					5.004	1.453
0.646	1.372		3.632	2.744				0.565											0.404					0.323	6.457		5.488	0.726			807		81	888					484	323
0.484	1.614		3.148	1.533				0.807											0.081					3.309	6.699		6.86	2.018			484		81	1.13					2.341	404
0.807	0.161		5.407	2.341				0.323											0.323					2.825	2.583		0.888	0.807			81		161						2.744	1.13
0.888	0.323		3.39	1.776				0.484											2.018					6.295	0.888		0.565	0.161			242		161						646	161
0.888	2.098		2.421	2.098				2.341											4.681						0.161		0.726	0.646			161		323						888	1.211
0.484	0.242		2.905	1.533				1.291											1.049						3.551		6.699	0.242			484		81						888	2.663
0.323	1.453		4.116	0.081				2.421											0.484						22.437		5.165	0.081			968		81						1.533	1.291
0.161	0.242		3.228	1.695				2.583											0.565						33.978		0.565	1.614			323		1.533						5.004	5.73
0.484	0.807		4.358	4.358				1.614											1.13						1.937		1.049	0.161			82		323						1.937	1.049
0.565	0.404		2.26	4.278				1.049											1.614						7.183		2.098	1.776			1.13		161						1.937	1.13
0.888	0.404		4.358	3.39				0.404											4.116						5.569		0.565	0.161			323		1.614						1.614	5.73
0.888	0.807		2.098	1.453				0.323											4.116						3.067		0.807	0.968			2.018		161						968	10.331
0.323	2.018		1.372	2.663				1.776											1.695						3.148		1.291	0.968			807		242						2.905	968
0.323	2.179		2.098	2.179				1.695											0.646						2.825		0.404	31.557			468		81						1.695	2.825
0.726	0.323		4.035	3.874				2.018											0.646						0.888		17.433	0.968			1.049		161						1.856	7.102
0.646	0.323		2.744	2.341				2.744											0.968						0.484		0.323	0.323			404		161						2.663	14.124
0.323	0.888		3.39	1.049				0.646											0.404						10.25		2.018	1.13			565		646						3.39	565
0.081	0.888		3.955	2.098				0.484											1.372						5.004		0.404	0.323			81		81						1.856	1.211
0.726	0.565		3.955	3.309				0.888											0.726						0.646		0.726	0.323			161		323						1.776	646
0.968	1.372		3.148	3.067				3.067											3.551						1.533		5.73	1.049			1.049		242						10.492
0.888	0.565		2.825	2.583				0.323											0.081						0.161		1.776	2.825			646		726						12
0.726	1.856		2.341	1.937				0.404											2.179						1.776		0.161	0.161			1.291		13.72						323
0.081	0.081		3.228	2.421				1.13											2.663						0.323		1.856	9.12			1.13		161						1.453
0.242	0.242		2.502	1.049				0.242											2.341						0.404		0.323	0.081			161		726						1.776
0.565	0.404		4.52	1.533				0.242											1.614						2.905		0.888	2.583			584		807						242
0.484	1.13		4.197	1.937				0.565											4.439						4.358		4.842	0.565			646		242						323
0.242	0.565		2.905	3.309				0.323											1.291						2.502		0.242	0.323			565		81						7.99
0.565	0.726		1.13	2.502				0.323											0.888						0.565		2.26	5.085			736		161						9.766
0.565	1.614		3.39	1.695				2.986											6.053						0.161		1.533	1.13			356		484						968
0.484	1.776		4.116	2.905				1.776											2.26						10.573		0.565	0.242			726		161						1.533
0.081	0.807		6.699	2.26				0.161											0.081						1.614		1.937	0.565			646		81						888
0.565	1.049		2.744	2.502				0.968											4.6						0.726		1.776	0.161			81		888						1.291
0.404	3.551		3.632	3.067				1.453											2.663						2.421		3.955	0.323			1.13		81						7.183
0.646	2.179		3.39	0.968				0.404											3.309						1.695		21.468	5.327			1.453		81						968
0.242	0.081		2.421	3.148				0.565											4.035						0.968		3.632	1.049			968		161						565
0.484	1.049		4.278	2.583				0.484											0.968						2.502		0.565	0.323			646		323						323
0.404	0.646		4.439	2.744				0.646											1.614						2.663		1.049	0.807			242		646						484
0.404	0.404		2.583	2.825				0.484											1.856						8.959		1.049	0.081			12.671		81						6.134
0.968	1.049		2.583	2.583				0.404											5.246						7.425		1.049	0.484			646		726						726
0.242	1.776		4.842	1.13				1.13											0.807						2.179		0.081	0.404			81		12.025						968
0.323	1.211		4.116	2.179				1.049											2.018						1.211		0.726	0.484			81		81
0.726	0.242		4.842	2.179				0.484											2.179						36.48		1.695	0.242			81		647
0.323	0.484		3.874	1.533				1.856											1.614						2.825		5.488	0.565			81		161
0.081	0.484		2.179	3.148				2.098											3.793						0.565		0.404	0.161			161		646
0.081	0.888		5.892	2.26				0.565											1.049						2.583		1.372	0.242			484		6.86
0.323	1.13		3.309	3.228				0.726											3.309						0.968		4.116	2.905			323		242
0.323	1.695		2.825	3.228				2.098											2.825						0.968		2.663	0.242			888		293
0.404	2.098		4.6	2.905				2.179											0.646						1.856		4.035	0.242			81		81
0.404	0.323		0.323	3.148				0.323											0.242						2.502		4.358	0.081			1.291		404
0.323	0.161		2.663	2.825				1.291											4.197						0.081		9.685	0.242			161		242
0.323	0.404		3.067	2.825				0.565											1.937						6.295		0.565	0.323			1.049		1.211
0.404	0.888		3.874	2.098				1.776											0.484						1.614		2.179	0.565			726		81
0.484	0.968		2.905	3.148				0.807											4.923						15.657		1.211	0.646			9.281		12.752
0.323	1.856		2.341	3.067				1.291											4.035						1.695		8.313	0.323			484		81
0.404	0.888		4.439	2.179				0.807											2.905						6.941		3.309	0.968			323		161
0.484	0.565		6.134	6.86				0.726											4.358						2.502		19.531	0.807			726		9.524
0.323	0.807		3.955	4.035				0.565											3.067						6.053		0.484	9.927			484		323
0.565	1.049		3.309	2.986				0.323											2.502						2.018		1.049	75.3			565		81
0.484	0.484		4.52	3.309				0.484											2.502						8.232		1.695	3.551			646		81
0.242	0.888		5.165	2.905				0.484											1.049						4.6		3.713	0.323			646		0.62
0.323	1.13		2.825	1.856				1.13											1.211						1.533		0.161	1.13			646		161
0.484	0.968		4.358	3.39				1.049											0.242						2.663		5.569	0.323			1.453		404
0.565	0.242		8.716	2.663				1.13											0.726						1.13		3.309	1.453			12		1.614
0.726	0.807		3.309	0.726				0.404											2.421						1.856		2.341	0.404			1.614		323
0.404	0.484		5.085	2.179				0.404											1.937						2.583		0.404	0.888			594		8.474
0.161	0.404		5.65	2.341				0.161											0.081						1.291		1.372	0.323			12.106		242
0.646	1.13		2.098	1.291				0.081											0.484						1.614		1.211	0.323			565		161
0.161	1.13		5.407	2.502				1.614											3.955						2.502		1.695	0.484			484		242
0.242	1.211		3.793	2.502				0.161											5.65						1.533		1.533	0.081			484		81
0.161	1.614		2.018	1.695				0.565											2.341						4.923		0.888	0.323			81		161
0.646	0.484		5.972	2.986				0.323											2.825						2.018		2.421	0.484			565		81
0.323	0.968		3.793	1.695				0.726											3.148						0.888		1.13	0.565			242		323
0.404	0.646			3.955				1.211											3.148						1.856		5.972	0.404			10.815		726
0.242	0.404			3.309				0.726											2.098						2.502		4.116	1.372			807		738
0.323	1.695			2.421				0.726											2.583						1.695		5.65	0.404			81		404
0.161	1.776			2.663				1.695											3.228						3.39		1.453	0.081			484		4.52
0.323	1.13			2.583				0.161											2.098						11.541		5.327	0.404			565		539
0.081	0.323			2.986				2.098											0.807						11.622		0.968	0.646			773		565
0.161	1.049			2.744				0.081											0.888						23.647		0.323	2.663			404		81
0.404	0.242			2.825				0.404											1.533						7.183		0.081	0.323			484		161
0.323	0.404			1.614				0.161											1.372						4.762		0.807	0.242			242		161
0.161	0.484			4.439				1.776											3.067						2.018		6.053	0.323			968		646
0.484	0.807			3.39				1.453											2.905						11.864		0.081	0.323			81		665
0.242	0.565			6.618				1.776											0.565						1.937		1.049	0.565			17		404
0.404	0.242			3.309				0.888											1.291						0.484		2.421	1.13			1.291		81
0.242	0.484			2.421				0.242											2.179						1.533		0.888	3.632			726		484
0.242	0.968			3.713				0.968											4.842						1.13		1.13	0.161			2.421		242
0.242	1.291			3.551				0.565											3.632						3.47		4.681	0.242			807		12.106
0.242	0.726			2.341				0.404											3.228						1.695		2.502	0.807			726		161
0.242	0.807			2.905				1.856											1.372						5.165		7.829	0.161			12.106		47
0.242	1.614			3.713				0.807											0.646						3.309		0.484	0.161			161		81
0.161	1.13			3.067				1.13											2.341						5.004		1.211	18.159			323		242
0.161	0.081			2.744				1.856											1.291						1.291		0.081	0.242			1.372		323
0.161	0.404			3.632				1.13											0.888						4.762		1.211	0.565			484		935
0.323	0.484			4.035				0.404											0.888						9.201		1.453	0.242			1.049		323
0.161	0.807			3.309				0.807											1.291						6.86		1.776	1.453			968		404
0.081	1.211			3.713				1.291											1.937						4.842		30.346	0.565			646		323
0.242	1.13			3.551				0.807											0.404						5.165		1.049	0.323			404		484
0.081	0.726			3.713				0.404											2.098						2.421		0.888	3.148			404		323
0.161	0.242			2.098				1.13											0.968						0.161		0.323	0.323			646		81
0.565	0.404			4.116				0.081											0.484						22.76		1.695	0.968			726		81
0.081	0.323			4.52				2.179											2.018						0.081		1.13	1.695			303		15.98
0.323	0.242			4.278				2.018											3.309						1.614		2.744	0.081			646		161
0.081	0.807			3.309				1.211											1.614						11.864		0.565	0.081			161		541
0.161	0.726			2.018				1.695											1.937						7.102		0.726	0.646			404		384
0.484	0.081			1.856				0.807											1.695						0.161		4.358	0.807			323		244
0.161	0.646			1.614				2.098											1.13						0.161		0.404	0.242			484		81
0.161	1.211			4.116				0.807											0.242						9.846		0.888	0.242			726		81
0.242	0.726			3.632				0.565											1.776						1.614		0.646	0.161			807		81
0.081	0.726			2.663				0.161											2.179						3.793		11.299	0.807			1.533		451
0.242	0.323			4.358				1.533											0.565						3.228		0.404	0.646			242		889
0.242	0.404			4.762				1.049											2.744						7.102		8.232	0.646			726		81
0.161	0.726			2.341				0.807											0.081						0.161		1.695	1.372			484		81
0.323	0.807			4.197				0.081											3.874						4.278		0.726	0.161			404		346
0.161	0.888			0.484				0.565											0.807						0.081		9.039	0.968			565		81
0.323	0.565			2.986				0.726											0.161						0.323		2.986	0.646					81
0.081	0.484			3.228				0.081											1.695						0.161		0.484	1.695					81
0.081	1.049			2.26				0.081											0.404						0.888		19.208	2.098					81
0.323	0.807			0.161				0.646											1.453						2.179		1.211	0.161					205
0.646	0.484			4.842				0.242											2.018						3.874		0.161	0.242					81
0.081	0.968			3.874				0.726											2.098						0.081		0.404	0.161
0.242	1.049			4.762				0.323											0.726						0.161		0.242	0.081
0.081	0.968			4.762				0.484											0.726						5.165		0.404	0.242
0.242	0.888			6.537				0.968											0.404						0.888		0.404	0.323
	0.968			3.632				1.291											1.533						2.018		1.856	0.161
	1.533			5.165				1.049											0.888						1.614		0.726	0.968
	0.323			4.842				0.404											0.646						0.726			0.484
	0.565			5.488				0.161											1.695						0.081			0.161
	0.726			4.681				0.888											3.39						0.807			0.807
	0.484			5.165				1.291											1.211						1.13			0.242
	0.484			5.085				1.211											0.888						0.081			0.081
	0.081			3.309				0.888											1.291						3.632			0.081
	0.323			3.793				0.726											0.888						3.955			4.681
	1.049			3.713				0.081											1.776						6.618			0.646
	0.081			4.762				0.323											2.018						0.081			0.161
	0.484			3.793				1.049											1.211						2.26			0.565
	0.484			4.762				0.161											2.744						3.955			0.081
	0.565			3.793				1.937											1.776						1.049			0.081
	1.13			5.327				0.081											1.453						3.551			0.081
	1.453			5.407				1.372											0.323						4.278			0.484
	0.484			2.663				0.726											2.098						2.663			0.161
	0.484			2.421				0.161											0.081						1.453			0.081
	0.646			2.905				0.646											0.161						0.404			0.161
	0.484			4.358				0.161											1.614						2.825			0.081
	0.968			5.488															2.744						15.173			0.726
	1.937			6.295															0.888						0.081			1.856
	0.161			4.762															0.484						4.116			8.878
	0.484			2.744															1.614						0.807			0.323
	0.323			2.421															0.081						0.646			0.807
	0.646			5.811															1.13						4.278			0.323
	0.807			4.439															3.551						0.404			0.161
	0.726			1.13															0.404						1.695			0.081
	0.888																		3.47						0.081			5.004
	1.049																		1.291						0.565			3.309
	0.081																		0.081						3.309			0.807
	0.242																		2.26						0.484			0.081
	0.565																		0.888						4.197			0.726
	0.807																		1.211						0.484			0.807
	0.404																		1.372						13.236			0.081
	0.726																		0.968						2.744			0.081
	0.242																		2.421						6.134			0.081
	0.565																		2.421						1.049			16.949
	0.323																		0.081						2.018			0.646
	1.13																		0.484						0.565			0.726
	0.484																		2.421						0.484			0.565
	0.484																		2.905						0.888			0.726
	1.211																		0.161						0.242			0.323
	0.323																		0.161									0.404
	0.404																		3.228									2.583
	0.323																		4.6									1.776
	0.646																		3.228									2.825
	0.646																		3.874									0.484
	1.049																		1.937									0.404
	0.323																		1.13									0.161
	0.565																		0.646									0.807
	0.565																		0.646									1.856
	0.888																		2.098									0.484
	0.323																		0.646									0.323
	0.726																		1.533									0.161
	0.726																		0.726									0.565
	0.242																		1.372									0.081
	0.404																		1.049									0.404
	0.161																		0.242									12.106
	0.323																		0.565									0.161
	0.565																		1.049									0.404
	0.968																		0.081									28.732
	0.726																		0.242									3.067
	0.726																		3.955									0.565
	1.049																		0.484									0.161
	0.404																		3.551									0.081
	0.323																		3.228									0.161
	0.161																		1.533									0.646
	0.646																		0.968									0.161
	0.404																		0.242									0.323
	0.484																		0.646									0.565
	0.484																		0.726									0.404
	0.646																		1.533									0.081
	0.968																		0.081									0.565
	0.726																		1.211									0.081
	0.646																		0.404									0.484
	0.565																		0.807									0.404
	1.211																		0.484									0.726
	0.565																		0.242									0.646
	0.404																		0.081									0.404
	0.565																											0.565
	0.888																											0.081
	0.726																											0.323
	0.404																											5.65
	0.565																											0.807
	0.807																											0.807
	0.888																											0.323
	0.807																											0.323
	0.565																											3.632
	0.888																											11.864
	0.161																											0.323
	0.565																											0.726
	0.565																											0.726
	0.565																											0.081
	0.646																											2.018
	0.565																											0.323
	0.242																											0.404
	0.565																											1.937
	0.646																											0.646
	0.404																											0.323
	0.726																											0.404
	0.484																											1.614
	0.323																											0.726
	0.323																											0.161
	0.726																											0.161
	0.323																											0.161
	0.807																											1.533
	0.404																											0.161
	0.726																											0.323
	0.484																											0.323
	0.404																											17.675
	0.565																											0.323
	0.404																											0.404
	0.404																											0.161
	0.484																											0.161
	0.484																											25.342
	0.726																											0.242
	0.404																											0.242
	0.484																											0.323
	0.081																											0.081
	0.404																											2.26
	0.404																											0.242
	0.484																											1.533
	0.323																											2.018
	0.565																											0.807
	0.646																											0.565
	0.323																											0.081
	0.484																											0.081
	0.484																											43.663
	0.404																											0.081
	0.323																											0.081
	0.323																											1.291
	0.565																											0.323
	0.323																											1.937
	0.726																											0.081
	0.242																											0.242
	0.565																											0.484
	0.404																											21.71
	0.484																											0.484
	0.161																											1.291
	0.646																											0.807
	0.484																											0.081
	0.323																											0.726
	0.404																											0.646
	0.323																											1.211
	0.242																											44.147
	0.081																											1.856
	0.242																											0.404
	0.161																											0.081
	0.081																											0.404
	0.081																											0.242
	0.161																											0.081
																												0.161
																												0.242
																												0.323
																												15.577
																												0.081
																												0.484
																												0.081
																												0.484
																												0.242
																												0.565
																												1.856
																												2.098
																												0.081
																												0.807
																												1.291
																												39.708
																												0.242
																												0.968
																												33.09
																												1.211
																												15.334
																												0.968
																												0.081
																												0.242
																												1.291
																												0.242
																												23.889
																												14.85
																												0.888
																												0.161
																												0.242
																												0.161
																												0.161
																												0.484
																												0.888
																												0.565
																												0.161
																												0.161
																												0.726
																												0.323
																												0.161
																												0.323
																												2.018
																												0.646
																												2.26
																												36.561
																												0.968
																												1.13
																												0.726
																												0.484
																												1.453
																												0.484
																												0.323
																												1.049
																												0.807
																												1.776
																												0.726
																												0.161
																												0.081
																												0.807
																												0.646
																												0.888
																												0.807
																												0.161
																												0.484
																												0.888
																												0.323
																												0.081
																												0.161
																												0.888
																												0.242
																												35.189
																												0.646
																												0.081
																												1.049
																												22.356
																												0.807
																												0.161
																												0.161
																												0.323
																												0.726
																												0.484
																												0.807
																												0.888
																												0.646
																												0.404
																												0.888
																												0.565
																												23.567
																												2.098
																												0.242
																												0.242
																												0.565
																												1.13
																												35.269
																												0.646
																												0.404
																												0.404
																												0.646
																												0.484
																												0.323
																												0.807
																												0.484
																												0.161
																												0.323
																												0.565
																												0.565
																												40.273
																												0.081
																												0.404
																												0.807
																												0.323
																												28.328
																												13.72
																												0.404
																												0.242
																												0.161
																												0.726
																												0.323
																												0.081
																												0.968
																												0.161
																												0.484
																												0.161
																												0.161
																												0.161
																												49.716
																												0.404
																												0.081
																												0.161
																												0.081
																												0.161
																												0.242
																												0.161
																												0.161
																												0.323
																												0.323
																												0.726
																												0.081
																												0.161
																												0.242
																												0.323
																												0.404
																												0.242
																												0.726
																												0.968
																												0.081
																												0.161
																												0.484
																												0.161
																												0.161
																												0.484
																												0.081
																												0.404
																												0.161
																												36.561
																												0.161
																												39.708
																												0.484
																												0.565
																												0.565
																												0.161
																												42.614
																												0.646
																												0.484
																												0.323
																												0.161
																												1.049
																												36.076
																												0.565
																												0.323
																												0.323
																												0.081
																												0.807
																												0.242
																												0.726
																												0.081
																												0.081
																												0.161
																												0.323
																												0.242
																												0.323
																												0.081
																												0.484
																												0.242
																												21.307
																												0.242
																												0.323
																												25.988
																												0.081
																												1.372
																												0.081
																												0.161
																												0.323
																												0.081
																												0.242
																												0.404
																												0.565
																												0.242
																												0.565
																												21.468
																												52.944
																												0.242
																												0.081
																												0.081
																												43.259
																												0.242
																												0.323
																												0.404
																												36.561
																												0.081
																												0.484
																												0.404
																												0.323
																												0.081
																												0.565
																												19.854
																												24.777
																												0.081
																												0.161
																												0.242
																												0.404
																												19.935
																												0.323
																												28.893
																												0.242
																												0.323
																												0.161
																												0.323
																												1.291
																												0.161
																												0.565
																												0.323
																												0.242
																												19.854
																												0.404
																												0.161
																												0.484
																												0.081
																												0.323
																												0.646
																												0.161
																												0.565
																												46.003
																												0.161
																												0.242
																												0.242
																												0.161
																												0.323
																												20.742
																												47.295
																												0.081
																												0.242
																												0.323
																												0.242
																												0.646
																												0.484
																												0.161
																												0.161
																												41.08
																												0.646
																												0.726
																												16.626
																												35.027
																												0.242
																												0.323
																												0.081
																												0.081
																												1.614
																												0.404
																												0.726
																												52.46
																												40.435
																												0.323
																												0.242
																												0.323
																												25.423
																												0.081
																												52.379
																												0.404
																												0.242
																												43.744
																												19.451
																												0.323
																												0.404
																												0.081
																												0.081
																												0.081
																												0.242
																												0.161
																												0.081
																												0.646
																												0.081
																												0.323
																												0.081
																												61.176
																												0.323
																												0.161
																												0.404
																												0.081
																												0.726
																												0.161
																												0.081
																												0.161
																												0.242
																												0.081
																												0.081
																												0.888
																												0.161
																												0.161
																												0.081
																												0.242
																												0.565
																												0.323
																												0.161
																												0.323
																												0.242
																												0.565
																												0.161
																												0.242
																												0.081
																												31.557
																												0.161
																												64.324
																												117.43
																												0.323
																												75.3
																												0.081
																												0.242
																												0.081
																												0.081
																												0.081
																												0.484
																												0.161
																												22.275
																												61.903
																												58.917
																												0.484
																												0.323
																												0.081
																												0.968
																												1.049
																												0.404
																												0.323
																												0.323
																												0.081
																												0.726
																												120.9
																												54.639
																												21.145
																												0.081
																												0.081
																												0.081
																												0.242
																												0.242
																												0.484
																												0.161
																												0.323
																												0.242
																												0.161
																												40.757
																												72.153
																												15.254
																												0.404
																												0.323
																												26.391
																												100.32
																												0.565
																												47.86
																												0.646
																												0.161
																												0.484
																												31.718
																												0.565
																												0.242
																												102.337
																												0.161
																												0.484
																												0.323
																												74.493
																												39.385
																												0.081
																												0.323
																												30.588
																												0.323
																												0.161
																												58.674
																												0.807
																												49.474
																												44.712
																												0.888
																												0.161
																												72.556
																												0.565
																												0.484
																												0.565
																												61.499
																												61.338
																												0.161
																												0.081
																												56.253
																												67.956
																												0.161
