# Supplementary material for: A scale-invariant log-normal droplet size distribution below the critical concentration for protein phase separation
Source: eLife. 2024 Nov 18;13:RP94214. doi: 10.7554/eLife.94214 (PMC11573347; doi:10.7554/eLife.94214)
Supplement: Supplementary file 3. — Size distributions of α-synuclein condensates at 50 μM concentration as a function of the time. [file elife-94214-supp3.xlsx]

## Sheet: Condensate_size_distribution_50
6 min	11 min	16 min
00:33:00	03:48:00	01:05:00
03:15:00	00:13:00	00:33:00
03:15:00	01:05:00	00:33:00
01:38:00	00:39:00	00:33:00
05:25:00	03:15:00	01:05:00
00:13:00	00:13:00	00:13:00
00:26:00	00:33:00	01:38:00
07:03:00	01:05:00	00:13:00
01:05:00	00:33:00	01:38:00
00:33:00	03:15:00	00:33:00
02:43:00	00:33:00	01:05:00
01:38:00	01:38:00	01:05:00
01:05:00	01:05:00	01:38:00
07:35:00	03:48:00	01:05:00
01:38:00	01:05:00	00:13:00
02:43:00	07:35:00	01:38:00
03:15:00	00:33:00	01:38:00
00:33:00	05:58:00	01:05:00
05:58:00	00:33:00	00:33:00
04:53:00	03:15:00	03:15:00
00:26:00	00:33:00	01:05:00
08:08:00	03:48:00	01:38:00
03:15:00	02:43:00	01:38:00
00:39:00	07:35:00	00:13:00
10:18:00	08:08:00	02:43:00
05:25:00	00:13:00	01:05:00
13:01:00	03:48:00	00:33:00
00:33:00	07:03:00	01:38:00
02:43:00	05:25:00	04:53:00
03:22:00	03:15:00	01:38:00
07:35:00	05:25:00	02:43:00
03:48:00	01:05:00	03:15:00
05:29:00	07:03:00	00:13:00
07:03:00	00:33:00	03:48:00
03:15:00	00:13:00	02:43:00
00:33:00	09:13:00	03:15:00
13:33:00	03:15:00	02:43:00
08:41:00	00:39:00	03:48:00
05:58:00	00:26:00	03:48:00
00:13:00	00:13:00	01:38:00
00:33:00	00:39:00	01:05:00
08:41:00	09:46:00	01:38:00
01:38:00	11:56:00	01:05:00
11:59:00	02:43:00	04:53:00
12:28:00	04:53:00	01:05:00
05:25:00	05:58:00	00:13:00
14:38:00	00:26:00	00:33:00
11:23:00	00:26:00	00:13:00
04:56:00	00:33:00	01:05:00
00:13:00	00:33:00	03:48:00
10:22:00	05:58:00	01:05:00
03:48:00	03:48:00	00:39:00
13:33:00	00:13:00	02:43:00
02:43:00	02:43:00	01:38:00
15:44:00	05:58:00	00:33:00
08:08:00	00:13:00	01:05:00
00:26:00	02:43:00	00:26:00
09:46:00	00:33:00	00:33:00
14:06:00	00:13:00	00:33:00
14:42:00	11:23:00	07:35:00
05:25:00	14:38:00	05:58:00
00:39:00	09:13:00	03:15:00
11:23:00	01:38:00	04:53:00
10:18:00	03:51:00	05:25:00
11:56:00	03:48:00	00:13:00
13:33:00	01:38:00	00:33:00
09:13:00	01:38:00	00:13:00
02:46:00	04:53:00	05:58:00
16:16:00	09:46:00	00:26:00
00:26:00	03:48:00	02:43:00
01:38:00	01:05:00	05:25:00
13:33:00	05:25:00	02:43:00
04:24:00	00:39:00	01:05:00
03:48:00	00:13:00	00:13:00
08:41:00	05:25:00	02:43:00
11:23:00	08:08:00	00:26:00
10:18:00	01:05:00	02:43:00
11:23:00	00:33:00	03:48:00
12:32:00	02:43:00	00:33:00
16:16:00	00:33:00	01:05:00
05:29:00	05:25:00	03:48:00
07:06:00	01:38:00	00:13:00
01:09:00	05:25:00	01:05:00
11:59:00	00:13:00	00:13:00
11:56:00	11:23:00	03:48:00
16:16:00	05:58:00	01:38:00
16:16:00	03:15:00	00:13:00
17:28:00	04:53:00	05:25:00
02:14:00	05:29:00	08:08:00
06:34:00	03:48:00	07:03:00
13:33:00	07:35:00	04:53:00
07:06:00	07:35:00	00:13:00
15:44:00	04:56:00	02:43:00
04:24:00	00:33:00	07:03:00
03:48:00	13:33:00	03:48:00
15:44:00	01:09:00	07:35:00
14:06:00	02:43:00	04:53:00
02:32:00	07:35:00	04:53:00
17:28:00	04:56:00	03:15:00
06:34:00	04:24:00	05:25:00
13:33:00	05:25:00	07:35:00
07:03:00	03:48:00	01:05:00
07:06:00	06:34:00	01:38:00
14:09:00	00:26:00	08:08:00
08:12:00	11:23:00	03:15:00
13:33:00	05:25:00	05:25:00
08:44:00	07:03:00	05:25:00
09:13:00	07:35:00	00:33:00
08:44:00	14:38:00	08:41:00
12:28:00	04:53:00	05:25:00
2.7	04:53:00	00:33:00
01:41:00	08:44:00	03:48:00
05:58:00	06:01:00	03:15:00
09:13:00	00:26:00	05:58:00
13:04:00	05:58:00	02:43:00
01:09:00	13:01:00	01:05:00
08:08:00	05:25:00	00:33:00
08:44:00	00:33:00	11:23:00
01:09:00	05:25:00	07:35:00
11:23:00	08:12:00	01:38:00
07:39:00	07:35:00	07:03:00
08:08:00	00:13:00	02:43:00
14:06:00	04:24:00	03:15:00
13:01:00	05:25:00	01:05:00
12:28:00	09:13:00	08:08:00
02:46:00	15:11:00	01:05:00
09:13:00	13:01:00	09:46:00
00:26:00	14:06:00	07:35:00
06:34:00	10:18:00	05:25:00
12:28:00	04:53:00	07:03:00
03:51:00	03:48:00	00:39:00
07:39:00	15:44:00	12:28:00
08:41:00	09:17:00	13:33:00
06:01:00	07:03:00	02:43:00
03:55:00	08:41:00	05:25:00
11:59:00	13:33:00	05:25:00
08:12:00	08:41:00	07:35:00
16:52:00	05:58:00	03:48:00
06:34:00	00:13:00	03:48:00
16:52:00	08:41:00	07:03:00
14:09:00	11:56:00	00:39:00
00:39:00	07:06:00	00:26:00
04:53:00	14:09:00	03:15:00
11:59:00	08:41:00	08:08:00
00:13:00	12:28:00	03:15:00
04:24:00	09:13:00	01:05:00
06:01:00	05:25:00	00:13:00
13:04:00	00:26:00	08:08:00
13:01:00	03:15:00	08:08:00
01:41:00	03:15:00	07:03:00
09:17:00	13:01:00	09:46:00
15:47:00	05:29:00	08:08:00
15:11:00	12:28:00	07:03:00
02:05:00	01:41:00	11:23:00
01:09:00	04:53:00	00:33:00
06:01:00	00:39:00	00:26:00
06:01:00	00:26:00	05:58:00
10:54:00	01:38:00	00:33:00
09:13:00	15:11:00	04:53:00
07:06:00	05:25:00	09:46:00
14:09:00	01:41:00	03:48:00
10:54:00	01:38:00	03:48:00
09:24:00	08:08:00	07:03:00
14:42:00	03:19:00	10:51:00
08:44:00	12:28:00	04:53:00
12:32:00	02:43:00	13:33:00
02:32:00	09:17:00	03:15:00
11:59:00	02:14:00	00:39:00
00:33:00	11:56:00	09:13:00
01:41:00	09:17:00	10:18:00
02:17:00	05:25:00	03:48:00
10:58:00	13:37:00	10:51:00
15:15:00	17:25:00	13:01:00
07:06:00	11:34:00	03:15:00
11:59:00	06:01:00	10:51:00
04:56:00	14:38:00	10:51:00
03:55:00	07:46:00	10:51:00
06:01:00	14:38:00	00:26:00
07:39:00	15:15:00	08:08:00
17:28:00	02:14:00	11:56:00
16:16:00	05:29:00	12:28:00
17:25:00	11:56:00	05:25:00
01:41:00	08:08:00	10:51:00
14:38:00	01:41:00	09:13:00
11:27:00	06:34:00	03:48:00
17:28:00	14:06:00	11:23:00
01:41:00	07:46:00	11:23:00
11:27:00	09:13:00	13:01:00
14:42:00	11:27:00	00:26:00
07:43:00	02:05:00	12:28:00
14:13:00	11:59:00	10:18:00
07:06:00	10:58:00	08:41:00
14:06:00	18:01:00	10:18:00
11:27:00	15:11:00	11:23:00
04:56:00	11:56:00	10:51:00
09:13:00	02:17:00	01:09:00
12:35:00	01:09:00	09:46:00
09:49:00	15:44:00	07:03:00
17:25:00	15:44:00	07:35:00
12:39:00	07:06:00	12:28:00
09:56:00	15:47:00	12:28:00
02:18:00	09:49:00	09:13:00
12:28:00	12:32:00	07:35:00
13:37:00	09:13:00	01:38:00
06:34:00	2.7	12:28:00
04:24:00	04:24:00	01:05:00
09:17:00	06:34:00	05:25:00
15:44:00	13:33:00	08:08:00
12:35:00	07:06:00	09:46:00
04:56:00	02:17:00	15:11:00
16:52:00	04:24:00	12:28:00
14:42:00	02:46:00	12:28:00
07:46:00	13:37:00	11:56:00
02:44:00	03:51:00	09:46:00
15:47:00	13:37:00	07:35:00
07:43:00	02:44:00	10:51:00
12:32:00	09:17:00	12:28:00
09:53:00	10:54:00	10:51:00
14:45:00	06:34:00	05:25:00
16:16:00	11:23:00	11:56:00
12:03:00	03:51:00	08:08:00
15:47:00	12:32:00	04:53:00
02:44:00	03:22:00	15:11:00
04:27:00	16:23:00	05:58:00
11:27:00	08:44:00	15:44:00
13:04:00	15:15:00	07:35:00
03:55:00	16:52:00	10:18:00
08:15:00	15:15:00	16:16:00
02:31:00	15:15:00	11:23:00
09:17:00	17:28:00	11:23:00
13:37:00	13:08:00	03:48:00
14:13:00	05:39:00	13:01:00
02:05:00	02:17:00	03:48:00
06:34:00	11:27:00	03:48:00
06:08:00	02:32:00	00:26:00
05:32:00	07:06:00	00:26:00
09:53:00	01:09:00	08:12:00
12:32:00	08:44:00	02:14:00
10:54:00	18:37:00	13:33:00
04:27:00	14:42:00	14:38:00
11:59:00	13:04:00	15:11:00
07:39:00	12:28:00	13:33:00
03:19:00	02:57:00	16:16:00
02:18:00	04:34:00	15:11:00
00:33:00	03:26:00	11:23:00
00:33:00	10:25:00	14:38:00
11:59:00	15:15:00	01:41:00
11:56:00	03:19:00	11:23:00
15:15:00	15:11:00	12:28:00
18:33:00	04:27:00	11:23:00
17:25:00	07:43:00	12:28:00
11:59:00	08:44:00	08:41:00
00:33:00	15:15:00	07:35:00
07:03:00	10:51:00	13:33:00
02:32:00	16:27:00	11:23:00
02:46:00	03:51:00	02:46:00
17:25:00	06:41:00	15:44:00
04:24:00	11:27:00	10:18:00
10:25:00	08:48:00	00:13:00
05:07:00	03:51:00	04:53:00
07:43:00	07:06:00	14:06:00
12:35:00	14:38:00	05:29:00
01:09:00	11:23:00	14:38:00
18:33:00	10:51:00	04:24:00
15:47:00	14:42:00	10:51:00
07:39:00	11:27:00	07:39:00
15:11:00	06:01:00	09:13:00
12:35:00	14:38:00	03:51:00
03:26:00	08:12:00	07:03:00
07:06:00	09:49:00	13:04:00
13:08:00	02:32:00	00:26:00
12:32:00	17:28:00	15:11:00
07:06:00	14:42:00	08:41:00
03:55:00	14:38:00	04:24:00
02:18:00	15:11:00	16:16:00
11:01:00	10:51:00	13:33:00
14:42:00	03:58:00	16:16:00
03:55:00	02:05:00	00:33:00
16:52:00	11:27:00	05:25:00
10:58:00	2.7	13:04:00
03:58:00	15:51:00	04:56:00
08:48:00	09:53:00	01:09:00
01:09:00	02:05:00	09:13:00
13:37:00	05:36:00	15:44:00
16:52:00	11:23:00	06:34:00
05:58:00	09:53:00	16:16:00
13:04:00	09:46:00	07:03:00
15:22:00	13:08:00	15:44:00
12:35:00	14:13:00	15:44:00
02:57:00	00:33:00	02:46:00
11:23:00	14:09:00	06:34:00
05:32:00	07:43:00	07:06:00
03:22:00	06:34:00	07:35:00
13:08:00	01:09:00	08:41:00
08:15:00	03:22:00	11:56:00
13:37:00	03:19:00	15:44:00
07:06:00	14:45:00	12:28:00
2.7	03:22:00	01:05:00
11:59:00	02:44:00	13:33:00
12:32:00	12:35:00	06:01:00
13:33:00	17:25:00	16:16:00
03:58:00	15:51:00	03:19:00
03:58:00	07:39:00	02:46:00
13:33:00	02:18:00	03:19:00
02:17:00	02:14:00	01:41:00
00:33:00	02:31:00	03:51:00
04:27:00	09:27:00	14:38:00
10:36:00	03:22:00	16:16:00
17:28:00	02:32:00	14:06:00
08:15:00	02:31:00	15:44:00
16:56:00	10:58:00	02:46:00
00:33:00	10:18:00	02:14:00
03:22:00	12:32:00	05:29:00
06:01:00	2.7	08:44:00
15:51:00	06:01:00	03:19:00
00:33:00	02:44:00	08:12:00
15:47:00	15:47:00	03:51:00
07:35:00	03:22:00	10:51:00
02:05:00	12:32:00	06:34:00
00:33:00	12:06:00	01:09:00
03:55:00	03:58:00	07:06:00
10:25:00	16:27:00	03:51:00
04:31:00	12:03:00	14:38:00
09:49:00	05:29:00	03:15:00
02:17:00	11:27:00	13:33:00
07:43:00	09:49:00	11:23:00
02:44:00	08:48:00	08:12:00
06:37:00	10:58:00	11:56:00
12:35:00	14:16:00	06:01:00
11:27:00	08:12:00	01:09:00
07:06:00	03:51:00	13:01:00
02:17:00	12:39:00	07:06:00
10:58:00	05:32:00	11:59:00
08:44:00	09:24:00	05:29:00
15:51:00	04:31:00	15:11:00
03:22:00	02:44:00	06:01:00
03:55:00	09:49:00	15:44:00
09:17:00	08:44:00	02:32:00
13:04:00	12:28:00	08:12:00
16:16:00	04:27:00	09:46:00
00:33:00	14:56:00	06:01:00
16:52:00	17:32:00	15:44:00
09:53:00	15:47:00	04:56:00
12:32:00	09:27:00	06:01:00
03:19:00	14:45:00	00:26:00
06:34:00	13:11:00	01:41:00
15:51:00	05:36:00	07:06:00
08:48:00	16:16:00	16:16:00
17:25:00	03:22:00	11:56:00
16:27:00	04:27:00	10:22:00
16:56:00	16:52:00	04:56:00
11:59:00	08:12:00	04:24:00
09:27:00	07:06:00	01:41:00
01:38:00	14:13:00	07:06:00
08:48:00	06:37:00	02:14:00
16:56:00	06:34:00	07:06:00
16:16:00	02:18:00	14:06:00
12:35:00	07:17:00	02:46:00
15:51:00	06:41:00	07:06:00
06:05:00	04:31:00	04:24:00
13:37:00	11:34:00	06:01:00
14:13:00	02:32:00	15:44:00
09:13:00	15:18:00	01:41:00
15:18:00	03:58:00	04:24:00
05:29:00	04:56:00	13:33:00
05:03:00	12:35:00	07:35:00
00:33:00	05:03:00	13:04:00
18:33:00	15:18:00	08:44:00
03:22:00	12:35:00	06:01:00
14:45:00	02:05:00	11:27:00
09:49:00	02:31:00	02:46:00
15:47:00	04:31:00	12:32:00
13:01:00	14:13:00	08:08:00
16:52:00	05:36:00	06:34:00
02:31:00	2.7	08:41:00
10:54:00	14:42:00	14:38:00
00:33:00	07:43:00	11:59:00
07:35:00	18:33:00	06:01:00
16:52:00	11:59:00	06:34:00
15:47:00	12:06:00	01:41:00
03:55:00	08:19:00	03:19:00
03:55:00	14:13:00	11:56:00
12:03:00	17:28:00	07:06:00
13:44:00	15:18:00	16:16:00
05:07:00	07:43:00	08:41:00
2.7	12:39:00	04:56:00
06:08:00	02:57:00	15:11:00
02:57:00	08:15:00	01:09:00
10:25:00	17:25:00	09:13:00
03:58:00	11:59:00	03:55:00
08:19:00	02:31:00	08:12:00
2.7	15:47:00	05:29:00
02:31:00	10:25:00	12:32:00
01:05:00	06:37:00	11:27:00
16:56:00	15:22:00	09:49:00
14:09:00	10:51:00	07:06:00
06:37:00	05:32:00	14:42:00
14:13:00	13:37:00	08:44:00
17:32:00	05:32:00	03:15:00
03:22:00	07:03:00	06:01:00
09:49:00	04:24:00	07:06:00
00:33:00	06:01:00	03:22:00
2.7	04:27:00	08:12:00
12:03:00	05:32:00	15:15:00
13:44:00	08:51:00	10:54:00
01:05:00	13:15:00	17:25:00
00:33:00	10:32:00	04:27:00
12:35:00	02:57:00	10:18:00
14:06:00	15:51:00	11:59:00
02:44:00	08:48:00	11:27:00
00:33:00	15:44:00	11:27:00
00:33:00	08:44:00	09:17:00
13:37:00	02:46:00	12:32:00
02:44:00	03:26:00	16:52:00
12:32:00	14:45:00	11:59:00
08:15:00	11:01:00	11:23:00
13:08:00	06:34:00	04:24:00
14:42:00	15:51:00	13:01:00
03:22:00	14:42:00	12:32:00
14:13:00	10:58:00	06:01:00
03:22:00	08:55:00	07:39:00
09:46:00	17:25:00	07:06:00
13:08:00	15:18:00	14:09:00
05:03:00	02:31:00	09:46:00
03:58:00	09:53:00	13:37:00
19:09:00	06:41:00	14:42:00
01:38:00	07:46:00	15:15:00
14:13:00	03:51:00	10:54:00
11:01:00	12:03:00	05:29:00
00:33:00	14:42:00	07:06:00
03:58:00	02:44:00	11:27:00
18:33:00	06:01:00	15:44:00
09:24:00	13:33:00	04:24:00
14:45:00	10:25:00	10:54:00
13:04:00	06:45:00	04:27:00
14:09:00	17:28:00	07:35:00
16:52:00	2.7	14:42:00
06:01:00	02:31:00	09:49:00
10:58:00	07:35:00	06:01:00
17:28:00	08:48:00	02:18:00
11:27:00	16:56:00	04:56:00
15:22:00	06:37:00	02:32:00
10:25:00	05:03:00	11:27:00
05:03:00	10:58:00	02:05:00
12:32:00	16:59:00	11:59:00
14:13:00	15:15:00	09:49:00
00:33:00	10:22:00	11:59:00
01:38:00	16:56:00	13:37:00
06:01:00	07:46:00	11:27:00
10:18:00	18:01:00	04:24:00
11:59:00	07:39:00	06:34:00
00:33:00	10:51:00	13:37:00
00:33:00	08:19:00	08:48:00
14:53:00	07:43:00	13:37:00
08:15:00	03:58:00	03:19:00
00:33:00	08:41:00	10:22:00
07:46:00	19:16:00	13:04:00
07:14:00	03:58:00	15:47:00
04:27:00	02:57:00	13:04:00
15:22:00	17:28:00	08:44:00
06:41:00	03:55:00	03:55:00
11:27:00	09:53:00	15:15:00
07:14:00	11:59:00	13:04:00
13:37:00	03:58:00	09:17:00
08:15:00	11:37:00	02:31:00
01:38:00	02:43:00	16:52:00
16:27:00	02:17:00	13:04:00
13:04:00	07:14:00	06:34:00
03:51:00	10:54:00	04:24:00
10:25:00	17:25:00	15:44:00
00:33:00	14:45:00	09:49:00
04:02:00	06:05:00	08:12:00
08:15:00	13:04:00	12:32:00
18:33:00	06:41:00	02:17:00
15:18:00	02:57:00	07:39:00
13:04:00	08:12:00	11:23:00
00:33:00	14:45:00	14:09:00
04:31:00	08:48:00	10:25:00
17:35:00	09:17:00	11:27:00
00:33:00	15:47:00	02:32:00
17:32:00	10:58:00	10:54:00
00:33:00	15:47:00	06:05:00
02:05:00	04:31:00	15:11:00
08:48:00	08:48:00	12:32:00
03:55:00	02:05:00	09:17:00
14:42:00	04:56:00	05:32:00
02:05:00	17:25:00	02:32:00
00:33:00	16:52:00	09:17:00
13:04:00	07:06:00	02:18:00
11:01:00	11:59:00	08:12:00
02:31:00	02:57:00	02:17:00
08:51:00	10:54:00	09:53:00
04:31:00	11:56:00	08:44:00
2.7	16:23:00	15:44:00
06:48:00	09:49:00	06:37:00
11:37:00	04:31:00	16:52:00
12:35:00	02:05:00	11:59:00
02:44:00	07:17:00	17:25:00
13:37:00	06:37:00	03:19:00
07:46:00	15:47:00	14:09:00
15:18:00	08:19:00	13:37:00
06:08:00	10:32:00	15:15:00
13:33:00	08:15:00	09:17:00
03:55:00	07:06:00	10:54:00
05:03:00	14:13:00	13:04:00
16:52:00	14:13:00	02:31:00
14:09:00	14:06:00	17:25:00
15:22:00	09:53:00	15:15:00
15:54:00	18:33:00	02:17:00
2.7	09:53:00	09:17:00
00:33:00	02:17:00	06:01:00
13:04:00	14:09:00	04:56:00
11:27:00	15:51:00	04:27:00
14:13:00	15:15:00	14:09:00
17:32:00	16:23:00	14:42:00
13:18:00	01:41:00	02:17:00
03:22:00	06:08:00	17:25:00
14:42:00	14:42:00	12:32:00
10:29:00	05:25:00	11:59:00
00:33:00	16:56:00	08:44:00
08:51:00	06:08:00	07:39:00
09:27:00	02:05:00	16:52:00
08:48:00	15:15:00	14:45:00
14:16:00	13:04:00	16:52:00
15:25:00	13:01:00	13:37:00
06:41:00	08:48:00	09:17:00
11:34:00	10:22:00	15:15:00
18:37:00	13:37:00	15:15:00
00:33:00	00:26:00	10:25:00
15:51:00	16:52:00	05:32:00
12:06:00	16:59:00	13:01:00
17:03:00	03:55:00	07:39:00
19:09:00	06:37:00	13:37:00
13:18:00	05:02:00	14:09:00
02:31:00	08:15:00	09:49:00
05:39:00	10:58:00	05:32:00
04:31:00	13:44:00	02:05:00
12:39:00	06:37:00	10:54:00
13:11:00	04:31:00	15:15:00
18:33:00	10:25:00	02:44:00
15:22:00	10:58:00	08:44:00
06:45:00	16:56:00	06:37:00
16:59:00	17:25:00	05:32:00
02:57:00	05:03:00	16:52:00
05:36:00	15:18:00	07:43:00
15:54:00	10:58:00	06:05:00
10:32:00	08:48:00	14:42:00
15:51:00	2.7	13:04:00
06:45:00	14:13:00	11:59:00
03:26:00	11:27:00	10:58:00
06:37:00	10:25:00	15:15:00
04:34:00	12:32:00	05:03:00
14:49:00	13:04:00	10:22:00
18:33:00	08:19:00	13:37:00
05:03:00	02:44:00	14:09:00
05:36:00	15:47:00	07:06:00
05:07:00	08:12:00	08:48:00
19:13:00	05:32:00	05:32:00
06:08:00	08:51:00	02:18:00
15:18:00	13:08:00	07:43:00
08:19:00	15:22:00	02:14:00
00:33:00	12:35:00	15:15:00
04:02:00	07:35:00	14:09:00
12:32:00	03:48:00	02:05:00
18:01:00	03:22:00	02:31:00
13:44:00	14:09:00	15:15:00
17:32:00	10:25:00	08:48:00
17:25:00	10:54:00	16:52:00
04:23:00	02:31:00	11:59:00
05:07:00	08:15:00	15:47:00
10:36:00	05:32:00	15:44:00
18:01:00	02:05:00	15:15:00
2.7	02:17:00	03:22:00
07:06:00	04:56:00	10:54:00
02:17:00	08:44:00	04:27:00
07:17:00	16:56:00	07:43:00
16:27:00	03:58:00	03:19:00
14:16:00	09:56:00	03:55:00
06:08:00	00:26:00	04:27:00
16:01:00	04:27:00	10:25:00
02:44:00	02:18:00	02:32:00
12:35:00	18:33:00	13:37:00
12:32:00	15:51:00	17:25:00
17:25:00	14:45:00	10:54:00
02:44:00	08:19:00	13:04:00
06:12:00	07:43:00	14:42:00
00:33:00	12:42:00	06:05:00
06:08:00	03:58:00	13:37:00
02:57:00	02:18:00	02:14:00
07:06:00	08:44:00	06:37:00
00:33:00	11:27:00	02:05:00
02:18:00	07:43:00	14:49:00
08:51:00	06:01:00	14:13:00
15:47:00	04:36:00	08:48:00
14:09:00	03:22:00	06:05:00
05:36:00	02:14:00	03:55:00
15:18:00	17:32:00	02:05:00
02:31:00	14:42:00	02:32:00
12:32:00	14:45:00	04:27:00
12:35:00	03:19:00	02:05:00
14:45:00	06:01:00	02:14:00
10:25:00	05:32:00	07:39:00
	12:46:00	05:32:00
	03:48:00	17:25:00
	02:05:00	2.7
	12:39:00	12:32:00
	04:31:00	17:25:00
	17:03:00	14:09:00
	11:27:00	04:56:00
	08:19:00	07:06:00
	14:45:00	08:44:00
	07:21:00	02:57:00
	08:12:00	14:42:00
	05:36:00	02:18:00
	12:42:00	14:42:00
	07:39:00	07:39:00
	04:02:00	13:44:00
	11:01:00	02:32:00
	14:42:00	05:29:00
	11:27:00	12:03:00
	06:37:00	12:03:00
	04:02:00	13:04:00
	10:18:00	12:03:00
	09:17:00	15:44:00
	03:26:00	02:17:00
	15:25:00	10:25:00
	17:25:00	02:17:00
	10:58:00	06:41:00
	02:44:00	13:44:00
	14:16:00	15:47:00
	05:32:00	08:19:00
	14:09:00	12:03:00
	09:49:00	06:08:00
	14:42:00	02:05:00
	03:55:00	06:37:00
	15:15:00	08:15:00
	06:41:00	06:37:00
	07:06:00	08:51:00
	09:24:00	03:22:00
	06:05:00	03:22:00
	04:23:00	15:15:00
	17:28:00	16:23:00
	20:18:00	2.7
	14:13:00	08:48:00
	05:15:00	09:24:00
	06:05:00	05:36:00
	13:04:00	14:42:00
	07:17:00	08:48:00
	15:25:00	12:03:00
	07:43:00	06:34:00
	12:03:00	15:51:00
	11:05:00	15:18:00
	06:41:00	02:17:00
	14:09:00	11:01:00
	08:22:00	15:15:00
	08:08:00	03:26:00
	15:18:00	15:47:00
	13:44:00	08:44:00
	07:39:00	06:05:00
	08:44:00	02:44:00
	12:39:00	09:17:00
	12:03:00	02:32:00
	10:32:00	2.7
	05:29:00	13:08:00
	13:44:00	06:05:00
	06:34:00	08:15:00
	05:43:00	02:18:00
	16:27:00	03:22:00
	11:27:00	13:11:00
	11:27:00	15:51:00
	03:58:00	06:12:00
	03:26:00	13:08:00
	03:58:00	02:18:00
	18:33:00	02:32:00
	07:17:00	16:23:00
	02:32:00	07:17:00
	10:29:00	03:58:00
	13:15:00	12:35:00
	12:42:00	12:35:00
	07:14:00	17:25:00
	05:07:00	14:09:00
	04:34:00	06:37:00
	09:24:00	16:16:00
	14:45:00	06:37:00
	03:58:00	16:52:00
	09:27:00	12:35:00
	09:56:00	09:49:00
	09:31:00	12:35:00
	04:23:00	08:48:00
	05:36:00	14:42:00
	15:22:00	2.7
	14:13:00	02:46:00
	16:52:00	17:25:00
	11:37:00	18:01:00
	04:49:00	08:48:00
	10:29:00	09:49:00
	14:16:00	04:56:00
	02:17:00	02:32:00
	18:01:00	12:35:00
	06:05:00	14:16:00
	15:18:00	16:23:00
	18:01:00	07:43:00
	15:22:00	05:03:00
	19:09:00	10:22:00
	12:35:00	18:37:00
	18:04:00	13:11:00
	16:23:00	22:35:00
	03:55:00	03:58:00
	11:59:00	17:32:00
	08:55:00	17:28:00
	14:49:00	07:14:00
	03:58:00	05:32:00
	03:26:00	17:25:00
	2.7	17:25:00
	03:26:00	10:58:00
	14:49:00	07:14:00
	05:15:00	22:35:00
	11:34:00	12:03:00
	06:05:00	20:18:00
	15:54:00	15:15:00
	11:59:00	12:39:00
	16:56:00	14:45:00
	13:11:00	14:45:00
	05:03:00	16:27:00
	15:15:00	15:22:00
	14:49:00	12:39:00
	14:49:00	07:43:00
	07:21:00	09:53:00
	15:51:00	04:34:00
	13:08:00	05:36:00
	06:34:00	02:17:00
	09:49:00	13:44:00
	17:32:00	02:17:00
	10:29:00	15:22:00
	16:59:00	08:19:00
	16:23:00	02:05:00
	11:41:00	12:46:00
	15:15:00	09:53:00
	15:51:00	05:15:00
	04:24:00	03:26:00
	04:27:00	17:25:00
	02:05:00	2.7
	11:05:00	13:44:00
	12:03:00	13:44:00
	03:55:00	08:19:00
	01:09:00	11:34:00
	10:54:00	04:27:00
	06:08:00	16:56:00
	06:34:00	05:58:00
	04:24:00	06:34:00
	15:51:00	13:11:00
	14:45:00	07:53:00
	09:49:00	12:06:00
	02:57:00	11:01:00
	08:12:00	07:24:00
	02:44:00	14:49:00
	15:15:00	13:44:00
		03:58:00
		15:22:00
		10:32:00
		15:54:00
		11:37:00
		06:54:00
		18:37:00
		14:13:00
		13:08:00
		11:34:00
		05:36:00
		15:18:00
		14:56:00
		07:14:00
		07:06:00
		04:49:00
		08:29:00
		06:05:00
		04:34:00
		07:43:00
		11:05:00
		07:17:00
		08:22:00
		10:51:00
		12:39:00
		03:22:00
		05:03:00
		12:35:00
		06:52:00
		14:53:00
		05:32:00
		15:54:00
		02:44:00
		15:47:00
		15:51:00
		05:03:00
		07:14:00
		02:18:00
		14:13:00
		15:58:00
		04:36:00
		09:31:00
		06:08:00
		2.7
		06:37:00
		05:32:00
		11:01:00
		09:56:00
		07:39:00
		02:32:00
		2.7
		12:42:00
		04:34:00
		15:54:00
		10:54:00
		05:15:00
		10:03:00
		12:28:00
		05:03:00
		09:27:00
		19:09:00
		18:37:00
		02:05:00
		04:34:00
		06:41:00
		02:32:00
		11:34:00
		15:54:00
		07:57:00
		06:37:00
		15:22:00
		09:24:00
		11:34:00
		11:05:00
		15:47:00
		08:19:00
		14:49:00
		18:37:00
		19:09:00
		15:44:00
		09:53:00
		04:23:00
		18:04:00
		08:51:00
		04:31:00
		16:01:00
		05:43:00
		2.7
		04:34:00
		12:35:00
		18:11:00
		19:09:00
		11:34:00
		07:46:00
		04:36:00
		04:49:00
		06:15:00
		20:18:00
		14:42:00
		03:55:00
		10:25:00
		14:49:00
		14:31:00
		03:26:00
		10:25:00
		17:03:00
		11:12:00
		11:12:00
		18:37:00
		10:32:00
		05:03:00
		07:57:00
		06:41:00
		06:12:00
		04:49:00
		03:58:00
		06:08:00
		08:48:00
		07:43:00
		07:46:00
		04:27:00
		18:01:00
		20:54:00
		04:36:00
		05:28:00
		04:23:00
		07:17:00
		05:39:00
		13:15:00
		16:27:00
		08:58:00
		07:14:00
		13:44:00
		12:42:00
		05:07:00
		14:13:00
		11:05:00
		17:03:00
		05:07:00
		17:32:00
		04:36:00
		12:06:00
		04:36:00
		18:37:00
		19:45:00
		09:24:00
		17:28:00
		15:25:00
		13:11:00
		07:14:00
		10:58:00
		08:19:00
		14:13:00
		14:49:00
		13:18:00
		09:24:00
		01:41:00
		15:18:00
		15:44:00
		05:03:00
		10:07:00
		02:05:00
		18:01:00
		15:15:00
		08:51:00
		17:03:00
		18:44:00
		12:06:00
		16:27:00
		14:09:00
		04:36:00
		16:27:00
		02:18:00
		16:23:00
		03:22:00
		07:28:00
		05:15:00
		19:49:00
		15:22:00
		14:13:00
		05:39:00
		13:15:00
		12:06:00
		14:53:00
		13:11:00
		12:39:00
		10:22:00
		14:16:00
		06:01:00
		02:05:00
		10:22:00
		11:01:00
		17:39:00
		07:17:00
		01:09:00
		10:29:00
		08:19:00
		06:45:00
		16:27:00
		07:53:00
		15:51:00
		08:51:00
		11:37:00
		20:18:00
		11:37:00
		05:07:00
		13:11:00
		15:58:00
		04:56:00
		09:56:00
		14:38:00
		18:04:00
		18:18:00
		06:45:00
		05:39:00
		15:22:00
		16:23:00
		10:25:00
		13:44:00
		09:27:00
		11:08:00
		08:41:00
		18:37:00
		05:02:00
		03:58:00
		15:18:00
		06:37:00
		08:19:00
		02:18:00
		06:12:00
		11:01:00
		06:37:00
		16:27:00
		02:18:00
		03:55:00
		14:13:00
		09:56:00
		08:22:00
		10:29:00
		16:56:00
		10:58:00
		02:32:00
		02:18:00
		02:32:00
		04:56:00
		06:12:00
		12:35:00
		08:55:00
		02:17:00
		04:31:00
		17:06:00
		08:19:00
		14:09:00
		15:15:00
		21:26:00
		14:13:00
		14:49:00
		07:39:00
		03:48:00
		08:51:00
		09:56:00
		05:07:00
		12:35:00
		17:32:00
		04:49:00
		14:16:00
		13:37:00
		03:22:00
		12:28:00
		06:12:00
		11:27:00
		15:54:00
		04:36:00
		02:17:00
		18:01:00
		10:58:00
		07:14:00
		06:05:00
		13:08:00
		06:34:00
		02:31:00
		11:23:00
		17:32:00
		16:23:00
		13:44:00
		09:02:00
		17:28:00
		15:18:00
		18:04:00
		14:53:00
		14:13:00
		03:26:00
		15:51:00
		14:13:00
		16:59:00
		10:32:00
		16:27:00
		08:51:00
		14:45:00
		11:34:00
		16:23:00
		05:32:00
		08:15:00
		05:03:00
		14:42:00
		08:55:00
		07:46:00
		03:55:00
		07:43:00
		14:49:00
		10:25:00
		08:19:00
		05:43:00
		14:06:00
		11:23:00
		10:58:00
		15:18:00
		07:14:00
		02:18:00
		07:43:00
		15:47:00
		03:58:00
		15:51:00
		16:56:00
		16:56:00
		03:55:00
		16:27:00
		13:15:00
		10:18:00
		15:18:00
		12:39:00
		05:36:00
		18:04:00
		09:24:00
		13:11:00
		04:02:00
		05:36:00
		05:15:00
		05:36:00
		02:44:00
		15:47:00
		13:08:00
		05:32:00
		17:25:00
		15:18:00
		05:02:00
		15:15:00
		13:15:00
		10:58:00
		14:49:00
		14:42:00
		16:23:00
		14:09:00
		14:06:00
		19:49:00
		15:47:00
		14:45:00
		05:07:00
		16:59:00
		09:53:00
		05:39:00
		07:53:00
		02:05:00
		11:01:00
		19:13:00
		16:27:00
		02:32:00
		05:15:00
		14:45:00
		04:23:00
		10:32:00
		08:44:00
		15:51:00
		19:45:00
		14:45:00
		05:36:00
		04:27:00
		13:18:00
		06:41:00
		05:02:00
		18:33:00
		09:53:00
		03:22:00
		02:44:00
		04:34:00
		02:05:00
		04:34:00
		14:45:00
		04:49:00
		10:29:00
		21:26:00
		09:31:00
		06:08:00
		16:23:00
		06:37:00
		05:43:00
		07:46:00
		19:09:00
		11:37:00
		01:09:00
		10:58:00
		06:45:00
		15:54:00
		05:32:00
		03:22:00
		11:37:00
		07:17:00
		05:36:00
		04:49:00
		04:02:00
		02:17:00
		15:58:00
		06:52:00
		08:48:00
		08:15:00
		19:09:00
		16:59:00
		06:08:00
		06:15:00
		02:57:00
		05:15:00
		07:14:00
		10:36:00
		16:59:00
		14:53:00
		11:37:00
		08:51:00
		00:33:00
		07:17:00
		12:13:00
		13:47:00
		07:57:00
		20:18:00
		04:02:00
		09:27:00
		12:39:00
		14:13:00
		17:35:00
		06:15:00
		08:55:00
		04:49:00
		16:56:00
		13:44:00
		05:03:00
		05:02:00
		08:19:00
		05:02:00
		16:23:00
		10:22:00
		12:42:00
		13:44:00
		13:44:00
		14:49:00
		12:42:00
		14:16:00
		14:56:00
		05:39:00
		05:15:00
		02:18:00
		11:34:00
		06:12:00
		08:15:00
		17:35:00
		15:58:00
		10:07:00
		09:24:00
		08:51:00
		13:04:00
		20:18:00
		09:27:00
		04:49:00
		13:11:00
		11:44:00
		02:57:00
		10:29:00
		14:42:00
		02:57:00
		14:45:00
		06:48:00
		16:23:00
		10:54:00
		09:24:00
		08:15:00
		03:55:00
		14:16:00
		02:17:00
		09:56:00
		05:36:00
		02:44:00
		18:33:00
		15:15:00
		18:33:00
